# Supplementary material for: Comparison of emergency hospital admissions for drug poisoning and major diseases: a retrospective observational study using a nationwide administrative discharge database
Source: PubMed Central journal article supplement — BMJ Open. 2012 Dec 5;2(6):e001857. doi: 10.1136/bmjopen-2012-001857 (PMC3533045; doi:10.1136/bmjopen-2012-001857), 2012-12-05
Supplement: bmjopen-2012-001857.draft_revisions.pdf [file bmjopen-2012-001857.draft_revisions.pdf]

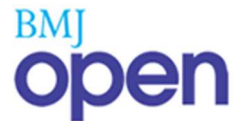

**Unique features of drug poisoning among the top 100 causes of emergency hospital admissions: a retrospective observational study using a nationwide administrative discharge database**

|                                 |                                                                                                                                                                                                                                                                                                                                                                                                                                                                                                                                                                                                                                                                                                               |
|---------------------------------|---------------------------------------------------------------------------------------------------------------------------------------------------------------------------------------------------------------------------------------------------------------------------------------------------------------------------------------------------------------------------------------------------------------------------------------------------------------------------------------------------------------------------------------------------------------------------------------------------------------------------------------------------------------------------------------------------------------|
| Journal:                        | <i>BMJ Open</i>                                                                                                                                                                                                                                                                                                                                                                                                                                                                                                                                                                                                                                                                                               |
| Manuscript ID:                  | bmjopen-2012-001857                                                                                                                                                                                                                                                                                                                                                                                                                                                                                                                                                                                                                                                                                           |
| Article Type:                   | Research                                                                                                                                                                                                                                                                                                                                                                                                                                                                                                                                                                                                                                                                                                      |
| Date Submitted by the Author:   | 25-Jul-2012                                                                                                                                                                                                                                                                                                                                                                                                                                                                                                                                                                                                                                                                                                   |
| Complete List of Authors:       | Okumura, Yasuyuki; National Institute of Mental Health, National Center of Neurology and Psychiatry, Department of Social Psychiatry Shimizu, Sayuri; Institute for Health Economics and Policy, Research Department<br>Ishikawa, Koichi; National Cancer Center, Statistics and Cancer Control Division<br>Matsuda, Shinya; University of Occupational and Environmental Health, Department of Preventive Medicine and Community Health<br>Fushimi, Kiyohide; Tokyo Medical and Dental University Graduate School of Medicine, Department of Health Policy and Informatics<br>Ito, Hiroto; National Institute of Mental Health, National Center of Neurology and Psychiatry, Department of Social Psychiatry |
| <b>Primary Subject Heading</b>: | Epidemiology                                                                                                                                                                                                                                                                                                                                                                                                                                                                                                                                                                                                                                                                                                  |
| Secondary Subject Heading:      | Mental health, Emergency medicine                                                                                                                                                                                                                                                                                                                                                                                                                                                                                                                                                                                                                                                                             |
| Keywords:                       | Suicide & self-harm < PSYCHIATRY, EPIDEMIOLOGY, HEALTH SERVICES ADMINISTRATION & MANAGEMENT                                                                                                                                                                                                                                                                                                                                                                                                                                                                                                                                                                                                                   |
|                                 |                                                                                                                                                                                                                                                                                                                                                                                                                                                                                                                                                                                                                                                                                                               |

SCHOLARONE™  
Manuscripts

1  
2  
3  
4  
5  
6  
7  
8  
9  
10  
11  
12  
13

# Unique features of drug poisoning among the top 100 causes of emergency hospital admissions: a retrospective observational study using a nationwide administrative discharge database

14 Yasuyuki Okumura,<sup>1</sup> Sayuri Shimizu,<sup>2</sup> Koichi B. Ishikawa,<sup>3</sup> Shinya Matsuda,<sup>4</sup> Kiyohide  
15 Fushimi,<sup>5</sup> Hiroto Ito<sup>1</sup>  
16  
17  
18  
19

20  
21 <sup>1</sup> Department of Social Psychiatry, National Institute of Mental Health, National Center of  
22 Neurology and Psychiatry, Tokyo 187-8553, Japan  
23

24  
25 <sup>2</sup> Research Department, Institute for Health Economics and Policy, Tokyo105-0003, Japan  
26

27  
28 <sup>3</sup> Statistics and Cancer Control Division, National Cancer Center, Tokyo 104-0045, Japan  
29

30  
31 <sup>4</sup> Department of Preventive Medicine and Community Health, University of Occupational  
32 and Environmental Health, Kitakyushu 807-8555, Japan  
33

34  
35 <sup>5</sup> Department of Health Policy and Informatics, Tokyo Medical and Dental University  
36 Graduate School of Medicine, Tokyo 113-8510, Japan  
37  
38  
39  
40  
41

42  
43 **Correspondence to** Yasuyuki Okumura, Department of Social Psychiatry, National Institute  
44 of Mental Health, National Center of Neurology and Psychiatry, 4-1-1 Ogawa-Higashi cho,  
45 Kodaira 187-8553, Tokyo, Japan; Tel.: + 81 42 346 2046; Fax: +81 42 346 2047; Email:  
46 yokumura@ncnp.go.jp  
47  
48  
49  
50  
51

52  
53  
54 **Key words** Retrospective studies; overdose; emergency medical services; epidemiology  
55

56  
57 **Word count:** 2215 word  
58  
59  
60

## ABSTRACT

**Objective:** To compare the clinical and procedural characteristics of the top 100 causes of emergency hospital admissions.

**Design:** Retrospective observational study.

**Setting:** Discharged patients from 855 acute care hospitals from 1 July to 31 December in 2008 in Japan.

**Results:** There were a total of 1 157 893 emergency hospital admissions. Among the top 100 causes, drug poisoning was ranked higher in terms of the percentage of patients using ambulatory (74.1%; 2nd) and tertiary emergency medical services (37.8%; 1st). Despite higher utilization of emergency care resources, drug poisoning ranked lower in terms of the median length of stay (2 days; 100th), percentage of requirement for surgery (1.7%; 91st), and in-hospital mortality ratio (0.3%; 74th).

**Conclusion:** Drug poisoning is unique among the top 100 causes of emergency admissions. Our findings suggest that drug poisoning imposes a greater burden on emergency care resources but has a less severe clinical course than other causes of admissions. Future research should focus on strategies to reduce the burden of drug poisoning on emergency medical systems.

## Article Summary

### Article focus

■ Only a few studies have compared resource use and clinical course among patients in a nationally representative sample. Our aim was to compare the clinical and procedural characteristics of the top 100 causes of emergency hospital admissions using a nationally representative sample of inpatients.

### Key messages

■ Drug poisoning is in an anomalous position among the top 100 causes of emergency admissions.

■ Patients with drug poisoning had a less severe clinical course than those with other causes, although they had higher utilization of emergency care resources.

### Strengths and limitations of this study

■ A large data from a nationwide discharge database was studied.

■ Our results are limited to inpatient admissions to acute care hospitals.

## INTRODUCTION

1  
2  
3  
4  
5  
6  
7 A better understanding of epidemiology in emergency medical services (EMS) is important  
8  
9 for planning EMS resource use and EMS personnel training needs.<sup>1</sup> Drug poisoning is a major  
10  
11 cause of admissions to acute care hospitals and places a considerable burden on EMS resources.  
12  
13 Drug poisoning accounts for over 15% of all admissions to intensive care units.<sup>2,3</sup> However,  
14  
15 most cases of drug poisoning do not result in clinical toxicity. Of patients with drug poisoning  
16  
17 admitted to an intensive care unit, 91% do not require advanced treatments.<sup>2</sup> Over 75% of  
18  
19 patients admitted to emergency departments can be released from medical observation after a  
20  
21 brief period (i.e., 1–2 days).<sup>4–6</sup> Less than 1% of cases result in mortality.<sup>7,8</sup> These previous  
22  
23 studies suggest that drug poisoning may impose a needless burden on high-level EMS despite  
24  
25 their limited requirements for advanced treatments.<sup>2,9</sup>  
26  
27  
28  
29

30 Although a number of studies have examined the detailed epidemiology of drug poisoning,<sup>2–8</sup>  
31  
32 only a few studies compare resource use and clinical course among patients in a nationally  
33  
34 representative sample.<sup>10–12</sup> It remains unknown whether drug poisoning imposes a greater  
35  
36 burden on emergency care resources and has a less severe clinical course among major causes of  
37  
38 admissions. We thus aimed to compare the clinical and procedural characteristics of the top 100  
39  
40 causes of emergency hospital admissions using a nationally representative sample of inpatients.  
41  
42  
43  
44  
45  
46  
47  
48  
49  
50  
51  
52  
53  
54  
55  
56  
57  
58  
59  
60

## METHODS

### Data source

We conducted a observational study using the nationwide discharge administrative database of the Diagnosis Procedure Combination/Per-Diem Payment System (DPC/PDPS), a Japanese case-mix classification system launched in 2002 by the Ministry of Health, Labour and Welfare of Japan.<sup>13</sup> Every year, the DPC Research Group conducts a survey of DPC/PDPS hospitals. In 2008, 855 of 1 558 DPC/PDPS hospitals participated in the survey. The DPC/PDPS database includes clinical and procedural information on all inpatients discharged from the participating hospitals between 1 July and 31 December. The database includes 2.86 million admissions, representing approximately 40% of all inpatient admissions to acute hospitals (excluding psychiatric and tuberculosis hospitals).<sup>14</sup> In the present study, we included all emergency hospital admissions and excluded planned admissions to the DPC/PDPS hospitals.

### Setting

In Japan, the EMS system is divided into 3 categories:<sup>15</sup> (1) primary EMS that provides care to patients who can be discharged without hospitalization; (2) secondary EMS that provides care to patients who require admission to a regular inpatient bed; and (3) tertiary EMS that provides care to severely ill and trauma patients who require intensive care. In 2008, there were 18 892 clinics and 963 hospitals for primary EMS, 3 053 hospitals for secondary EMS, and 214 hospitals for tertiary EMS.<sup>14</sup> In the present study, we focused on secondary and tertiary EMS rather than primary EMS, because the DPC/PDPS database is an inpatient database.

## Clinical and procedural characteristics

To describe clinical and procedural characteristics of emergency hospital admissions, we used the following study variables: (1) age; (2) gender; (3) major disease categories; (4) comorbidities at admissions; (5) level of consciousness assessed by the Japan Coma Scale (JCS);<sup>16</sup> (6) use of ambulance service; (7) use of tertiary EMS; (8) requirement for surgery; (9) length of stay (days); and (10) in-hospital mortality.

Physicians recorded information on diagnoses using the International Classification of Diseases 10th revision (ICD-10) codes. According to the ICD-10 codes, 506 major disease categories were defined in 2008. In the database, patients with drug, chemical, and unspecified poisoning (ICD-10 codes T360–T509, T510–T659, and T887, respectively) have the same major disease code (disease code 161070). In the present study, we modified the disease code to separate drug poisoning from chemical and unspecified poisoning.

In the database, up to 4 diagnosed comorbidities per patient were recorded. Using the criteria developed by the Global Burden of Disease study with some modifications,<sup>17</sup> we defined comorbid status of mental illness as being diagnosed with any of the following ICD-10 codes: unipolar depressive disorders (F32–F33); bipolar affective disorder (F30–F31); schizophrenia (F20–F29); alcohol use disorders (F10); drug use disorders (F11–F16 and F18–F19); post-traumatic stress disorder (F431); obsessive-compulsive disorder (F42); panic disorder (F400 and F410); or insomnia (F51).

## Statistical analyses

1  
2  
3  
4  
5  
6  
7  
8 First, we conducted univariate analyses to summarize the clinical and procedural  
9 characteristics of all emergency admissions. Second, we compared 8 variables among the top 100  
10 emergency causes of admissions. These variables were: (1) percentage of patients aged 65 years  
11 or older; (2) percentage of patients comorbid with mental illness; (3) percentage of patients  
12 admitted to hospitals with deep coma (JCS scores  $\geq 100$ , corresponding to scores of  $\leq 7$  on  
13 the Glasgow Coma Scale);<sup>16</sup> (4) percentage of patients using ambulatory services; (5)  
14 percentage of patients using tertiary EMS; (6) percentage of patients requiring surgery; (7)  
15 median length of stay; and (8) percentage of in-hospital mortality. To maximize interpretability,  
16 we restricted this analysis to patients with one of the top 100 causes of admissions. We used a  
17 predictive principal component analysis (PCA) biplot to reduce the dimensionality of  
18 multivariate data (i.e., 100 causes of admissions  $\times$  8 variables) and then to visualize 2 dimensions  
19 with minimal loss of information.<sup>18</sup> Before conducting the predictive PCA biplot, we  
20 standardized each variable with a mean of 0 and a standard deviation of 1 because the  
21 measurement units of 8 variables were incommensurable. In the predictive PCA biplot, the 8  
22 variables were represented by 8 biplot axes to read off predictive values of the variables for each  
23 of the top 100 causes. All statistical analyses were performed with R version 2.4.1.<sup>19</sup> The  
24 predictive PCA biplot was performed using the BiplotGUI package under R.<sup>19</sup>  
25  
26  
27  
28  
29  
30  
31  
32  
33  
34  
35  
36  
37  
38  
39  
40  
41  
42  
43  
44  
45  
46  
47  
48  
49  
50  
51  
52  
53  
54  
55  
56  
57  
58  
59  
60



## RESULTS

### Characteristics of all emergency hospital admissions

During the study period, there were a total of 1 157 893 emergency hospital admissions to 855 hospitals. Characteristics of these admissions are presented in Table 1. The majority (51.7%) of admissions were for patients aged  $\geq 65$  years. Patients aged 0–14 years accounted for less than one-sixth (15.3%) of the admissions. The most prevalent diagnosis was pneumonia, accounting for 10.2% of all admissions, followed by stroke (5.5%) and heart failure (2.8%). Drug poisoning ranked in the top 41 causes of admissions. Less than 5% of patients used tertiary EMS. Of those patients, 88.3% stayed for more than 3 days. About 7% of patients died during hospitalization.

-----  
Insert Table 1 here  
-----

### Comparison of drug poisoning and other causes of admissions

The top 100 causes of admissions cover 83% (965 749 admissions) of all admissions. Characteristics by cause of admission are shown in Table 2 for the top 10 causes and drug poisoning; the top 100 causes are also shown in the Supplemental Table. The predictive PCA biplot with 2 dimensions accounts for 62.9% of the variance in the data from the top 100 causes. The predictive PCA biplot revealed that drug poisoning was in a unique position (Figure 1). Among the top 100 causes, patients with drug poisoning were less likely to be aged  $\geq 65$  years (13.4%; 86th) and most likely to be diagnosed with mental illness (33.7%; 1st). In addition, patients with drug poisoning were more likely to be admitted to hospitals with deep coma (26.2%; 2nd), more likely to use ambulatory services (74.1%; 2nd), and most likely to use

1  
2  
3 tertiary EMS (37.8%; 1st). Despite the higher utilization of emergency care resources, clinical  
4  
5 course of drug poisoning was less severe. Among the top 100 causes, patients with drug  
6  
7 poisoning had the shortest median length of stay (2 days; 100th), were less likely to require  
8  
9 surgery (1.7%; 91st), and were less likely to die during hospitalization (0.3%; 74th).  
10  
11

12 -----

13  
14 Insert Table 2 and Figure 1 here  
15  
16

17 -----  
18  
19  
20  
21  
22  
23  
24  
25  
26  
27  
28  
29  
30  
31  
32  
33  
34  
35  
36  
37  
38  
39  
40  
41  
42  
43  
44  
45  
46  
47  
48  
49  
50  
51  
52  
53  
54  
55  
56  
57  
58  
59  
60

## DISCUSSION

To our knowledge, this is the first study that used a nationally representative sample to compare detailed clinical and procedural characteristics between drug poisoning and other causes of emergency hospital admissions. We found that drug poisoning was unique among the top 100 causes of emergency admissions. Patients with drug poisoning had a less severe clinical course than those with other causes, although they had higher utilization of emergency care resources. Our findings suggest that drug poisoning imposes a higher burden on emergency care resources than other causes of emergency admissions.

Our results are consistent with those of a case-control study conducted in Australia and New Zealand.<sup>10</sup> That study found that median length of stay in patients with drug poisoning was 3 days, which was much lower than the overall median length of stay (9 days) in patients with 1 of the 8 most common diagnoses in a tertiary intensive care unit. One possible explanation for the potential over-utilization of high-level EMS resource is that staff with significant experience in psychosocial assessment might be more available in high-level EMS facilities. In Japan, 85% of tertiary EMS hospitals have psychiatric departments, while 23% of secondary EMS hospitals are so equipped.<sup>14</sup> Because most patients with drug poisoning have attempted suicide,<sup>20</sup> and self-harm patients should receive a specialist psychosocial assessment according to the clinical guideline,<sup>21</sup> patients with drug poisoning are transferred to high-level EMS in which mental health specialists are more available.

Another explanation for the potential over-utilization is that staff in secondary EMS hospitals might decline to manage patients with drug poisoning. A survey conducted in Osaka city revealed that ambulance officers contacted more hospitals to transport patients with drug poisoning than all patients (average number of contacted hospitals: 7.6 vs. 1.8, respectively).<sup>22</sup>

1  
2  
3 It would be of great value to investigate triage tools predicting the need for advanced treatments  
4 based on information not only from early admission factors,<sup>23</sup> but also from pre-hospital  
5 factors.<sup>24</sup>  
6  
7  
8  
9

10 Our study has several limitations. First, our results cannot be generalized and are limited to  
11 inpatient admissions to acute care hospitals rather than emergency outpatient admissions or  
12 emergency admissions to psychiatric hospitals, because we used the DPC/PDPS database.  
13  
14 Second, we were unable to evaluate variables not included in the DPC/PDPS database. As a  
15 result, we could not assess other potentially important factors predicting the need for advanced  
16 treatments, such as acute physiology and chronic health evaluation (APACHE) scores at  
17 admission<sup>23</sup> or clinical management and course during pre-hospital period.<sup>24</sup> Third, although  
18 the database included approximately 40% of all inpatient admissions in Japan, participation in  
19 the survey was voluntary for each hospital and the patient selection procedure was not based on a  
20 random sampling technique from all acute hospitals.  
21  
22  
23  
24  
25  
26  
27  
28  
29  
30  
31  
32  
33

34 In conclusion, we have demonstrated that drug poisoning is unique among the top 100 causes  
35 of emergency admissions. Future research should focus on strategies to reduce the burden of  
36 drug poisoning on emergency medical systems.  
37  
38  
39  
40  
41  
42  
43  
44  
45  
46  
47  
48  
49  
50  
51  
52  
53  
54  
55  
56  
57  
58  
59  
60

## Acknowledgements

The authors would like to thank Dr. Toshie Noda for her feedbacks on an earlier draft of this article.

## Funding

Funding for administrating the study was supported by Grants-in-Aid for Research on Policy Planning and Evaluation (Japanese Ministry of Health, Labour and Welfare H22-SEISAKU-SITEI-031 and H24-SEISAKU-SITEI-012). Funding for writing this article was supported by a Health Labour Sciences Research Grant (H22-IYAKU-IPPAN-013) from the Ministry of Health, Labour and Welfare of Japan.

## Competing Interest

None.

## Ethic approval

The study protocol was approved by the institutional review board of the University of Occupational and Environmental Health, Fukuoka, Japan.

## Contributors

SM, KBI, and KF conducted data collection, data synthesis, and data management. KF and HI obtained funding. YO participated in study concept and design, analysis and interpretation of data, drafting of the manuscript, and critical revision of the manuscript. SS supervised data analysis. SS, KBI, KF, and HI participated in interpretation of data and critical revision of the

1  
2  
3 manuscript for important intellectual content. All authors contributed to and approved the final  
4  
5 manuscript.  
6  
7

### 8 9 **Provenance and peer review**

10  
11 Not commissioned; externally peer reviewed.  
12  
13

### 14 15 **Data sharing information**

16  
17 No additional data are available.  
18  
19  
20  
21  
22  
23  
24  
25  
26  
27  
28  
29  
30  
31  
32  
33  
34  
35  
36  
37  
38  
39  
40  
41  
42  
43  
44  
45  
46  
47  
48  
49  
50  
51  
52  
53  
54  
55  
56  
57  
58  
59  
60

## References

1. Platts-Mills TF, Leacock B, Cabanas JG, *et al.* Emergency medical services use by the elderly: analysis of a statewide database. *Prehosp Emerg Care* 2010;**14**:329-33.
2. Schwake L, Wollenschlager I, Stremmel W, *et al.* Adverse drug reactions and deliberate self-poisoning as cause of admission to the intensive care unit: a 1-year prospective observational cohort study. *Intensive Care Med* 2009;**35**:266-74.
3. McGrath J. A survey of deliberate self-poisoning. *Med J Aust* 1989;**150**:317-8, 320-1, 324.
4. Henderson A, Wright M, Pond SM. Experience with 732 acute overdose patients admitted to an intensive care unit over six years. *Med J Aust* 1993;**158**:28-30.
5. Hendrix L, Verelst S, Desruelles D, *et al.* Deliberate self-poisoning: characteristics of patients and impact on the emergency department of a large university hospital. *Emerg Med J* 2012.
6. Hollander JE, McCracken G, Johnson S, *et al.* Emergency department observation of poisoned patients: how long is necessary? *Acad Emerg Med* 1999;**6**:887-94.
7. Heyerdahl F, Bjornaas MA, Dahl R, *et al.* Repetition of acute poisoning in Oslo: 1-year prospective study. *Br J Psychiatry* 2009;**194**:73-9.
8. Xiang Y, Zhao W, Xiang H, *et al.* ED visits for drug-related poisoning in the United States, 2007. *Am J Emerg Med* 2011;**30**:293-301.
9. Hamad AE, Al-Ghadban A, Carvounis CP, *et al.* Predicting the need for medical intensive care monitoring in drug-overdosed patients. *J Intensive Care Med* 2000;**15**:321-328.
10. Flabouris A, Hart GK, George C. Outcomes of patients admitted to tertiary intensive care units after interhospital transfer: comparison with patients admitted from emergency departments. *Crit Care Resusc* 2008;**10**:97-105.

- 1  
2  
3 11. Spiller HA, Singleton MD. Comparison of incidence of hospital utilization for poisoning and  
4  
5 other injury types. *Public Health Rep* 2011;**126**:94-9.  
6  
7
- 8 12. Wadman MC, Muelleman RL, Coto JA, *et al*. The pyramid of injury: using ecodes to  
9  
10 accurately describe the burden of injury. *Ann Emerg Med* 2003;**42**:468-78.  
11  
12
- 13 13. Matsuda S, Ishikawa KB, Kuwabara K, *et al*. Development and use of the Japanese case-mix  
14  
15 system. *Eurohealth* 2008;**14**:25-30.  
16  
17
- 18 14. Statistics and Information Department, Minister's Secretariat, Ministry of Health, Labour and  
19  
20 Welfare. *2008 Summary of Static/Dynamic Surveys of Medical Institutions and Hospital*  
21  
22 *Report (in Japanese)*. Tokyo: Health and Welfare Statistics Association, 2010.  
23  
24
- 25 15. Japan International Cooperation Agency. Emergency medical care. *Japan's experiences in*  
26  
27 *public Health and medical systems: towards improving public health and medical systems in*  
28  
29 *developing countries*. Tokyo: Institute for International Cooperation, Japan International  
30  
31 Cooperation Agency, 2005:227-244.  
32  
33
- 34 16. Takeuchi E. Reliability of grading systems of impaired consciousness. Statistical evaluation  
35  
36 of inter-rater reliability and validity of the Japan coma scale (JCS) (in Japanese). *J Osaka*  
37  
38 *Medical College*, 1988:20-30.  
39  
40
- 41 17. World Health Organization. *The global burden of disease: 2004 update*: Author, 2004.  
42  
43
- 44 18. Gower J, Lubbe S, Roux NL. *Understanding biplots*: Wiley, 2011.  
45
- 46 19. R Development Core Team. *R: A language and environment for statistical computing*. Vienna,  
47  
48 Austria: R Foundation for Statistical Computing, 2011.  
49  
50
- 51 20. Hirata K, Matsumoto Y, Tomioka J, *et al*. Acute drug poisoning at critical care departments in  
52  
53 Japan. *Jpn J Hosp Pharm* 1998;**24**:340-348.  
54  
55  
56  
57  
58  
59  
60



- 1  
2  
3  
4  
5  
6  
7  
8  
9  
10  
11  
12  
13  
14  
15  
16  
17  
18  
19  
20  
21  
22  
23  
24  
25  
26  
27  
28  
29  
30  
31  
32  
33  
34  
35  
36  
37  
38  
39  
40  
41  
42  
43  
44  
45  
46  
47  
48  
49  
50  
51  
52  
53  
54  
55  
56  
57  
58  
59  
60
21. National Institute for Health and Clinical Excellence. *Self-harm: the short-term physical and psychological management and secondary prevention of self-harm in primary and secondary care*. Manchester: Author, 2004.
  22. Fire and Disaster Management Agency of the Ministry of Internal Affairs and Communications. *Reports on emergency medicine 2009* Tokyo, 2010.
  23. Eizadi Mood N, Sabzghabae AM, Khalili-Dehkordi Z. Applicability of different scoring systems in outcome prediction of patients with mixed drug poisoning-induced coma. *Indian J Anaesth* 2011;**55**:599-604.
  24. Gwini SM, Shaw D, Iqbal M, *et al*. Exploratory study of factors associated with adverse clinical features in patients presenting with non-fatal drug overdose/self-poisoning to the ambulance service. *Emerg Med J* 2011;**28**:892-4.

**Table 1** Characteristics of emergency hospital admissions

| Characteristic                                                                      | N of admissions | % of admissions | 95% CI    |
|-------------------------------------------------------------------------------------|-----------------|-----------------|-----------|
| Age                                                                                 |                 |                 |           |
| 0–14                                                                                | 177 092         | 15.3            | 15.2–15.4 |
| 15–64                                                                               | 382 025         | 33.0            | 32.9–33.1 |
| ≥ 65                                                                                | 598 776         | 51.7            | 51.6–51.8 |
| Gender women                                                                        | 547 280         | 47.3            | 47.2–47.3 |
| Top 10 causes of admissions and drug poisoning (Disease code)                       |                 |                 |           |
| 1. Pneumonia, acute bronchitis, acute bronchiolitis (040080)                        | 117 649         | 10.2            | 10.1–10.2 |
| 2. Stroke (010060)                                                                  | 63 931          | 5.5             | 5.5–5.6   |
| 3. Heart failure (050130)                                                           | 32 993          | 2.8             | 2.8–2.9   |
| 4. Intestinal obstruction without hernia (060210)                                   | 28 701          | 2.5             | 2.5–2.5   |
| 5. Fracture of proximal femur (160800)                                              | 25 905          | 2.2             | 2.2–2.3   |
| 6. Viral enteritis (150010)                                                         | 24 920          | 2.2             | 2.1–2.2   |
| 7. Asthma (040100)                                                                  | 23 858          | 2.1             | 2.0–2.1   |
| 8. Angina pectoris, chronic ischemic heart disease (050050)                         | 20 775          | 1.8             | 1.8–1.8   |
| 9. Disorder associated with shortened gestation period or low birth weight (140010) | 20 540          | 1.8             | 1.8–1.8   |
| 10. Renal infection (110310)                                                        | 19 853          | 1.7             | 1.7–1.7   |
| 41. Drug poisoning (161070)                                                         | 6 748           | 0.6             | 0.6–0.6   |
| Other causes                                                                        | 769 326         | 66.4            | 66.4–66.5 |
| Comorbid mental illness                                                             | 23 279          | 2.0             | 2.0–2.0   |
| Deep coma                                                                           | 26 792          | 2.3             | 2.3–2.3   |
| Ambulance services                                                                  | 311 333         | 26.9            | 26.8–27.0 |
| Tertiary EMS                                                                        | 54 938          | 4.7             | 4.7–4.8   |
| Surgery                                                                             | 321 974         | 27.8            | 27.7–27.9 |
| Length of stay (days)                                                               |                 |                 |           |
| ≤ 3                                                                                 | 135 096         | 11.7            | 11.6–11.7 |
| 4–7                                                                                 | 266 651         | 23.0            | 23.0–23.1 |
| 8–14                                                                                | 296 549         | 25.6            | 25.5–25.7 |
| 15–30                                                                               | 258 717         | 22.3            | 22.3–22.4 |
| 31–60                                                                               | 136 014         | 11.7            | 11.7–11.8 |
| ≥ 60                                                                                | 64 866          | 5.6             | 5.6–5.6   |
| Death during hospitalization                                                        | 78 226          | 6.8             | 6.7–6.8   |

Comorbidity of mental illness was defined as the following ICD-10 codes as comorbidities: unipolar depressive disorders (F32–F33), bipolar affective disorder (F30–F31), schizophrenia (F20–F29), alcohol use disorders (F10), drug use disorders (F11–F16 and F18–F19), post-traumatic stress disorder (F431), obsessive-compulsive disorder (F42), panic disorder (F400 and F410), or insomnia (F51). Deep coma was defined as a score on the Japan Soma Scale of 100 or more. EMS, emergency medical services.

## Emergency hospital admissions 18

**Table 2** Characteristics of poisoning and other causes of admissions

| Rank | Top 10 causes of admissions and drug poisoning (Disease code)                    | ICD-10 codes                                                                                                                                                                                                                                                                                                                                                                                             | N       | %    | Clinical and procedural characteristics, %/median, (rank) |                 |           |           |          |           |           |           |
|------|----------------------------------------------------------------------------------|----------------------------------------------------------------------------------------------------------------------------------------------------------------------------------------------------------------------------------------------------------------------------------------------------------------------------------------------------------------------------------------------------------|---------|------|-----------------------------------------------------------|-----------------|-----------|-----------|----------|-----------|-----------|-----------|
|      |                                                                                  |                                                                                                                                                                                                                                                                                                                                                                                                          |         |      | Age ≥ 65                                                  | Comorbid Mental | Deep Coma | Ambulance | Tertiary | Surgery   | LOS       | Mortality |
| 1    | Pneumonia, acute bronchitis, acute bronchiolitis (040080)                        | A370, A378, A379, A481, B012, B052, B371, B59, J13, J14, J15*, J16*, J17*, J18*, J20*, J21*, J22, J69*                                                                                                                                                                                                                                                                                                   | 117 649 | 10.2 | 48.7 (57)                                                 | 1.5 (53)        | 2.2 (23)  | 19.3 (53) | 2.2 (43) | 5.7 (82)  | 9.0 (62)  | 7.9 (29)  |
| 2    | Stroke (010060)                                                                  | G45*, G46*, I63*, I65*, I66*, I675, I679, I693, I978                                                                                                                                                                                                                                                                                                                                                     | 63 931  | 5.5  | 77.8 (11)                                                 | 1.5 (53)        | 4.0 (14)  | 44.1 (21) | 8.0 (21) | 8.0 (77)  | 17.0 (30) | 5.2 (35)  |
| 3    | Heart failure (050130)                                                           | I50*                                                                                                                                                                                                                                                                                                                                                                                                     | 32 993  | 2.8  | 86.0 (4)                                                  | 1.3 (60)        | 1.6 (26)  | 34.3 (27) | 9.3 (19) | 11.5 (67) | 18.0 (27) | 11.1 (24) |
| 4    | Intestinal obstruction without hernia (060210)                                   | K560, K562, K563, K564, K565, K566, K567, K913                                                                                                                                                                                                                                                                                                                                                           | 28 701  | 2.5  | 64.3 (33)                                                 | 1.9 (40)        | 0.2 (68)  | 18.1 (59) | 2.0 (48) | 19.3 (57) | 11.0 (51) | 2.4 (48)  |
| 5    | Fracture of proximal femur (160800)                                              | M2435, M2445, S7200, S7210, S7220, S7230, S7270, S7280, S7290, S730                                                                                                                                                                                                                                                                                                                                      | 25 905  | 2.2  | 90.6 (1)                                                  | 3.7 (9)         | 0.1 (75)  | 49.5 (14) | 1.5 (58) | 91.0 (5)  | 30.0 (2)  | 1.4 (58)  |
| 6    | Viral enteritis (150010)                                                         | A08*, A09                                                                                                                                                                                                                                                                                                                                                                                                | 24 920  | 2.2  | 23.4 (80)                                                 | 0.9 (73)        | 0.1 (75)  | 14.9 (67) | 0.3 (87) | 0.8 (95)  | 5.0 (89)  | 0.2 (79)  |
| 7    | Asthma (040100)                                                                  | J45*, J46                                                                                                                                                                                                                                                                                                                                                                                                | 23 858  | 2.1  | 12.0 (87)                                                 | 0.8 (76)        | 0.4 (52)  | 9.5 (85)  | 1.2 (64) | 0.5 (97)  | 6.0 (82)  | 0.3 (74)  |
| 8    | Angina pectoris, chronic ischemic heart disease (050050)                         | I20*, I25*                                                                                                                                                                                                                                                                                                                                                                                               | 20 775  | 1.8  | 68.2 (23)                                                 | 0.9 (73)        | 0.4 (52)  | 31.9 (31) | 7.7 (22) | 43.7 (29) | 7.0 (78)  | 0.8 (64)  |
| 9    | Disorder associated with shortened gestation period or low birth weight (140010) | P00*, P01*, P02*, P03*, P04*, P05*, P07*, P08*, P10*, P11*, P12*, P13*, P15*, P20*, P21*, P22*, P23*, P24*, P25*, P26*, P27*, P28*, P29*, P35*, P36*, P37*, P38, P39*, P50*, P51*, P52*, P53, P54*, P55*, P56*, P57*, P58*, P590, P591, P592, P593, P598, P599, P60, P61*, P70*, P71*, P72*, P74*, P75, P76*, P77, P780, P781, P782, P783, P789, P80*, P81*, P83*, P90, P91*, P92*, P93, P94*, P95, P96* | 20 540  | 1.8  | 0.0 (95)                                                  | 0.0 (98)        | 0.4 (52)  | 9.4 (86)  | 0.0 (97) | 10.5 (71) | 8.0 (70)  | 0.5 (69)  |
| 10   | Renal infection (110310)                                                         | N10, N151, N390                                                                                                                                                                                                                                                                                                                                                                                          | 19 853  | 1.7  | 63.7 (34)                                                 | 1.7 (44)        | 1.1 (32)  | 22.5 (47) | 1.3 (63) | 6.7 (80)  | 10.0 (55) | 1.5 (56)  |
| 41   | Drug poisoning* (161070)                                                         | T36*, T37*, T38*, T39*, T40*, T41*, T42*, T43*, T44*, T45*                                                                                                                                                                                                                                                                                                                                               | 6 748   | 0.6  | 13.4 (86)                                                 | 33.7 (1)        | 26.2 (2)  | 74.1 (2)  | 37.8 (1) | 1.7 (91)  | 2.0 (100) | 0.3 (74)  |

Rankings were based on data from the top 100 causes of admissions. Comorbidity of mental illness was defined as the following ICD-10 codes as comorbidities: unipolar depressive disorders (F32–F33), bipolar affective disorder (F30–F31), schizophrenia (F20–F29), alcohol use disorders (F10), drug use disorders (F11–F16 and F18–F19), post-traumatic stress disorder (F431), obsessive-compulsive disorder (F42), panic disorder (F400 and F410), or insomnia (F51). Deep coma was defined as a score on the Japan Soma Scale of 100 or more. Ambulance, ambulance service; LOS, median length of stay; Mortality, in-hospital mortality; Tertiary, tertiary emergency medical services; \*, wild card.

1  
2  
3  
4  
5  
6  
7  
8  
9  
10  
11  
12  
13  
14  
15  
16  
17  
18  
19  
20  
21  
22  
23  
24  
25  
26  
27  
28  
29  
30  
31  
32  
33  
34  
35  
36  
37  
38  
39  
40  
41  
42  
43  
44  
45  
46  
47  
48  
49  
50  
51  
52  
53  
54  
55  
56  
57  
58  
59  
60

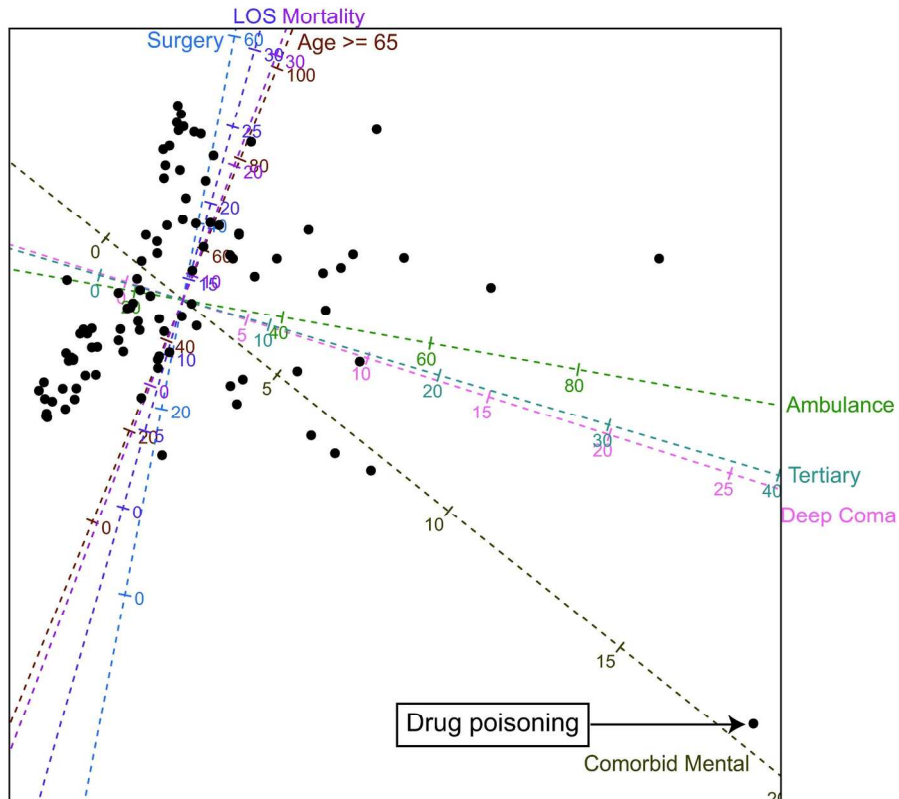

The predictive principal component biplot on data from the characteristics of the top 100 causes. Each dot represents one of the causes. Eight axes are positioned and calibrated so that the orthogonal projection of a dot onto an axis 'predicts' as best as is graphically possible the value of the corresponding disease on the corresponding variable. Ambulance, ambulance services; LOS, median length of stay; Mortality, in-hospital mortality; Surgery, surgical procedures; Tertiary, tertiary emergency medical services.  
177x177mm (300 x 300 DPI)

## Supplemental Table

| Rank | Clinical diagnosis (Disease code)                                                                   | ICD-10 codes                                                                                                                                                                                                                                                                                                                                                                                             | N       | %    | Clinical and procedural characteristics, %/median, (rank) |                 |           |           |          |           |           |           |
|------|-----------------------------------------------------------------------------------------------------|----------------------------------------------------------------------------------------------------------------------------------------------------------------------------------------------------------------------------------------------------------------------------------------------------------------------------------------------------------------------------------------------------------|---------|------|-----------------------------------------------------------|-----------------|-----------|-----------|----------|-----------|-----------|-----------|
|      |                                                                                                     |                                                                                                                                                                                                                                                                                                                                                                                                          |         |      | Age ≥ 65                                                  | Comorbid Mental | Deep Coma | Ambulance | Tertiary | Surgery   | LOS       | Mortality |
| 1    | Pneumonia, acute bronchitis, acute bronchiolitis (040080)                                           | A370, A378, A379, A481, B012, B052, B371, B59, J13, J14, J15*, J16*, J17*, J18*, J20*, J21*, J22, J69*                                                                                                                                                                                                                                                                                                   | 117 649 | 10.2 | 48.7 (57)                                                 | 1.5 (53)        | 2.2 (23)  | 19.3 (53) | 2.2 (43) | 5.7 (82)  | 9.0 (62)  | 7.9 (29)  |
| 2    | Stroke (010060)                                                                                     | G45*, G46*, I63*, I65*, I66*, I675, I679, I693, I978                                                                                                                                                                                                                                                                                                                                                     | 63 931  | 5.5  | 77.8 (11)                                                 | 1.5 (53)        | 4.0 (14)  | 44.1 (21) | 8.0 (21) | 8.0 (77)  | 17.0 (30) | 5.2 (35)  |
| 3    | Heart failure (050130)                                                                              | I50*                                                                                                                                                                                                                                                                                                                                                                                                     | 32 993  | 2.8  | 86.0 (4)                                                  | 1.3 (60)        | 1.6 (26)  | 34.3 (27) | 9.3 (19) | 11.5 (67) | 18.0 (27) | 11.1 (24) |
| 4    | Intestinal obstruction without hernia (060210)                                                      | K560, K562, K563, K564, K565, K566, K567, K913                                                                                                                                                                                                                                                                                                                                                           | 28 701  | 2.5  | 64.3 (33)                                                 | 1.9 (40)        | 0.2 (68)  | 18.1 (59) | 2.0 (48) | 19.3 (57) | 11.0 (51) | 2.4 (48)  |
| 5    | Fracture of proximal femur (160800)                                                                 | M2435, M2445, S7200, S7210, S7220, S7230, S7270, S7280, S7290, S730                                                                                                                                                                                                                                                                                                                                      | 25 905  | 2.2  | 90.6 (1)                                                  | 3.7 (9)         | 0.1 (75)  | 49.5 (14) | 1.5 (58) | 91.0 (5)  | 30.0 (2)  | 1.4 (58)  |
| 6    | Viral enteritis (150010)                                                                            | A08*, A09                                                                                                                                                                                                                                                                                                                                                                                                | 24 920  | 2.2  | 23.4 (80)                                                 | 0.9 (73)        | 0.1 (75)  | 14.9 (67) | 0.3 (87) | 0.8 (95)  | 5.0 (89)  | 0.2 (79)  |
| 7    | Asthma (040100)                                                                                     | J45*, J46                                                                                                                                                                                                                                                                                                                                                                                                | 23 858  | 2.1  | 12.0 (87)                                                 | 0.8 (76)        | 0.4 (52)  | 9.5 (85)  | 1.2 (64) | 0.5 (97)  | 6.0 (82)  | 0.3 (74)  |
| 8    | Angina pectoris, chronic ischemic heart disease (050050)                                            | I20*, I25*                                                                                                                                                                                                                                                                                                                                                                                               | 20 775  | 1.8  | 68.2 (23)                                                 | 0.9 (73)        | 0.4 (52)  | 31.9 (31) | 7.7 (22) | 43.7 (29) | 7.0 (78)  | 0.8 (64)  |
| 9    | Disorder associated with shortened gestation period or low birth weight (140010)                    | P00*, P01*, P02*, P03*, P04*, P05*, P07*, P08*, P10*, P11*, P12*, P13*, P15*, P20*, P21*, P22*, P23*, P24*, P25*, P26*, P27*, P28*, P29*, P35*, P36*, P37*, P38, P39*, P50*, P51*, P52*, P53, P54*, P55*, P56*, P57*, P58*, P590, P591, P592, P593, P598, P599, P60, P61*, P70*, P71*, P72*, P74*, P75, P76*, P77, P780, P781, P782, P783, P789, P80*, P81*, P83*, P90, P91*, P92*, P93, P94*, P95, P96* | 20 540  | 1.8  | 0.0 (95)                                                  | 0.0 (98)        | 0.4 (52)  | 9.4 (86)  | 0.0 (97) | 10.5 (71) | 8.0 (70)  | 0.5 (69)  |
| 10   | Renal infection (110310)                                                                            | N10, N151, N390                                                                                                                                                                                                                                                                                                                                                                                          | 19 853  | 1.7  | 63.7 (34)                                                 | 1.7 (44)        | 1.1 (32)  | 22.5 (47) | 1.3 (63) | 6.7 (80)  | 10.0 (55) | 1.5 (56)  |
| 11   | Gastroduodenal ulcer, gastric diverticulum, pyloric stenosis (060140)                               | K25*, K26*, K311, K312, K314                                                                                                                                                                                                                                                                                                                                                                             | 19 387  | 1.7  | 53.5 (52)                                                 | 1.6 (47)        | 0.4 (52)  | 37.2 (25) | 6.6 (26) | 62.1 (17) | 11.0 (51) | 1.8 (55)  |
| 12   | Chronic nephritic syndrome/chronic interstitial nephritis/chronic renal failure (110280)            | I120, I129, N02*, N03*, N05*, N06*, N07*, N08*, N11*, N12, N14*, N18*, N391, N392                                                                                                                                                                                                                                                                                                                        | 19 295  | 1.7  | 67.3 (27)                                                 | 1.4 (58)        | 1.0 (33)  | 18.7 (55) | 3.0 (37) | 31.2 (43) | 16.0 (34) | 6.8 (33)  |
| 13   | Appendicitis (060150)                                                                               | K35*, K36, K37, K38*                                                                                                                                                                                                                                                                                                                                                                                     | 18 566  | 1.6  | 11.9 (88)                                                 | 0.8 (76)        | 0.0 (82)  | 9.1 (88)  | 1.5 (58) | 75.4 (10) | 6.0 (82)  | 0.0 (85)  |
| 14   | Bile duct (intra/extra hepatic) lithiasis (060340)                                                  | K803, K804, K805, K830, K831, K832, K833, K834, K838, K839, K915                                                                                                                                                                                                                                                                                                                                         | 17 869  | 1.5  | 75.6 (13)                                                 | 1.1 (68)        | 0.3 (60)  | 16.9 (64) | 2.3 (42) | 68.3 (14) | 14.0 (44) | 2.9 (43)  |
| 15   | Inflammation of oesophagus, stomach, duodenum and other intestines (other benign diseases) (060130) | B054, I880, K20, K21*, K220, K221, K222, K223, K224, K225, K226, K228, K229, K23*, K27*, K28*, K29*, K30, K310, K313, K315, K316, K318, K52*, K58*, K627, K633, K634, K638, K639, K90*, K910, K911, K912, K914, K92*, K93*                                                                                                                                                                               | 17 715  | 1.5  | 60.8 (47)                                                 | 2.3 (28)        | 0.5 (50)  | 25.9 (42) | 4.0 (33) | 31.8 (42) | 9.0 (62)  | 2.3 (49)  |
| 16   | Skull and intracranial injury (160100)                                                              | S000, S007, S008, S009, S010, S017, S018, S019, S020*, S021*, S06*, S071, S079, S080, S089, S090, S091, S097                                                                                                                                                                                                                                                                                             | 17 372  | 1.5  | 57.9 (49)                                                 | 2.6 (22)        | 8.1 (9)   | 63.9 (6)  | 18.0 (8) | 44.4 (28) | 8.0 (70)  | 5.8 (34)  |
| 17   | Nontraumatic intracranial haematoma (excluding nontraumatic subdural haematoma) (010040)            | I61*, I629, I680, Q280, Q281, Q282, Q283                                                                                                                                                                                                                                                                                                                                                                 | 16 389  | 1.4  | 62.2 (42)                                                 | 1.1 (68)        | 19.6 (3)  | 70.0 (3)  | 21.8 (3) | 22.3 (55) | 23.0 (11) | 15.6 (21) |

## Supplemental Table

| Rank | Clinical diagnosis (Disease code)                                                                                        | ICD-10 codes                                                                                                                             | N      | %   | Clinical and procedural characteristics, %/median, (rank) |                 |           |           |           |           |           |           |
|------|--------------------------------------------------------------------------------------------------------------------------|------------------------------------------------------------------------------------------------------------------------------------------|--------|-----|-----------------------------------------------------------|-----------------|-----------|-----------|-----------|-----------|-----------|-----------|
|      |                                                                                                                          |                                                                                                                                          |        |     | Age ≥ 65                                                  | Comorbid Mental | Deep Coma | Ambulance | Tertiary  | Surgery   | LOS       | Mortality |
| 18   | Acute myocardial infarction, recurrent myocardial infarction (050030)                                                    | I21*, I22*, I24*                                                                                                                         | 15 812 | 1.4 | 63.6 (35)                                                 | 0.8 (76)        | 3.0 (19)  | 56.5 (8)  | 21.5 (4)  | 85.2 (6)  | 15.0 (38) | 7.9 (29)  |
| 19   | Benign disease of small and large intestine (including benign tumour) (060100)                                           | D12*, D133, D191, D197, D199, D201, D372, D373, D374, D375, K57*, K620, K621, K635                                                       | 13 657 | 1.2 | 43.6 (64)                                                 | 0.7 (82)        | 0.0 (82)  | 7.9 (90)  | 1.1 (65)  | 45.9 (27) | 7.0 (78)  | 0.3 (74)  |
| 20   | Malignant pulmonary tumour (040040)                                                                                      | C33, C34*, C780, D021, D022, D024                                                                                                        | 13 327 | 1.2 | 75.3 (14)                                                 | 2.3 (28)        | 0.8 (38)  | 19.5 (52) | 1.4 (60)  | 10.9 (69) | 21.0 (20) | 40.5 (4)  |
| 21   | Epilepsy (010230)                                                                                                        | G40*, G41*                                                                                                                               | 12 668 | 1.1 | 34.6 (70)                                                 | 3.3 (12)        | 12.7 (5)  | 68.6 (4)  | 10.4 (15) | 2.3 (88)  | 5.0 (89)  | 0.9 (62)  |
| 22   | Vestibular dysfunction (030400)                                                                                          | H810, H811, H812, H813, H818, H819                                                                                                       | 12 589 | 1.1 | 56.8 (51)                                                 | 1.2 (66)        | 0.0 (82)  | 48.3 (15) | 0.4 (86)  | 0.3 (99)  | 5.0 (89)  | 0.0 (85)  |
| 23   | Hydrops of gallbladder, cholecystitis (060335)                                                                           | D135, K800, K801, K81*, K820, K821, K822, K823, K824, K828, K829, K835, K870                                                             | 11 924 | 1.0 | 63.2 (39)                                                 | 1.5 (53)        | 0.3 (60)  | 18.2 (58) | 2.2 (43)  | 55.5 (22) | 15.0 (38) | 1.5 (56)  |
| 24   | Malignant gastric tumour (060020)                                                                                        | C16*, D002                                                                                                                               | 11 210 | 1.0 | 73.7 (16)                                                 | 1.6 (47)        | 0.4 (52)  | 15.4 (66) | 1.1 (65)  | 43.4 (30) | 23.0 (11) | 29.2 (7)  |
| 25   | Blood poisoning (180010)                                                                                                 | A021, A327, A391, A392, A393, A394, A395, A398, A399, A40*, A41*, B007, B250, B252, B376, B377, B387, B393, B407, B417, B427, B447, B464 | 10 923 | 0.9 | 67.4 (26)                                                 | 2.1 (31)        | 6.2 (11)  | 40.8 (23) | 12.1 (12) | 29.7 (46) | 17.0 (30) | 25.9 (10) |
| 26   | Acute pyoderma (080011)                                                                                                  | A46, L00, L01*, L020, L021, L022, L024, L028, L029, L03*, L08*                                                                           | 10 547 | 0.9 | 49.7 (55)                                                 | 1.1 (68)        | 0.2 (68)  | 9.3 (87)  | 0.7 (75)  | 13.5 (63) | 10.0 (55) | 0.5 (69)  |
| 27   | Upper respiratory tract inflammation (030270)                                                                            | B302, J00, J02*, J06*, J31*                                                                                                              | 10 124 | 0.9 | 6.4 (90)                                                  | 0.3 (93)        | 0.2 (68)  | 7.9 (90)  | 0.1 (91)  | 0.3 (99)  | 5.0 (89)  | 0.0 (85)  |
| 28   | Impairment from fracture of thoracic or lumbar vertebra or lower (including thoracic/lumbar spinal cord injury) (160690) | S220*, S221*, S230, S231, S232, S233, S240, S241, S242, S245, S320*, S330, S331, S340, S341, S342, S343, S344, S345, T08*                | 9 547  | 0.8 | 82.9 (8)                                                  | 2.7 (19)        | 0.1 (75)  | 45.3 (19) | 2.4 (39)  | 8.2 (76)  | 26.0 (6)  | 0.3 (74)  |
| 29   | Cirrhosis (including biliary cirrhosis) (060300)                                                                         | I81, I820, I850, I859, I864, I982, K717, K721, K729, K740, K741, K742, K743, K744, K745, K746, K765, K766                                | 9 189  | 0.8 | 61.7 (44)                                                 | 2.7 (19)        | 3.3 (17)  | 33.4 (28) | 6.2 (27)  | 39.5 (33) | 17.0 (30) | 19.4 (17) |
| 30   | Malignant tumour of liver/intrahepatic bile duct (including secondary tumour) (060050)                                   | C22*, C787, D015, D376                                                                                                                   | 8 854  | 0.8 | 74.5 (15)                                                 | 1.5 (53)        | 1.0 (33)  | 18.0 (60) | 1.6 (55)  | 31.2 (43) | 17.0 (30) | 42.9 (3)  |
| 31   | Acute tonsillitis, acute laryngopharyngitis (040060)                                                                     | A691, J03*, J04*, J05*, J390, J391, J392, J393, J399                                                                                     | 8 795  | 0.8 | 6.3 (91)                                                  | 0.5 (87)        | 0.1 (75)  | 5.6 (93)  | 0.5 (80)  | 2.7 (87)  | 5.0 (89)  | 0.1 (82)  |
| 32   | Pneumothorax (040200)                                                                                                    | J93*                                                                                                                                     | 8 764  | 0.8 | 27.4 (77)                                                 | 0.6 (85)        | 0.3 (60)  | 14.6 (68) | 2.2 (43)  | 37.3 (37) | 9.0 (62)  | 1.3 (59)  |
| 33   | Malignant tumour of colon (ascending to sigmoid colon) (060035)                                                          | C18*, C260, C269, C775, C785, D010                                                                                                       | 8 409  | 0.7 | 71.6 (19)                                                 | 1.5 (53)        | 0.3 (60)  | 12.7 (77) | 1.4 (60)  | 62.2 (16) | 24.0 (9)  | 17.2 (18) |
| 34   | Dehydration (100380)                                                                                                     | E86                                                                                                                                      | 8 380  | 0.7 | 61.5 (45)                                                 | 3.2 (13)        | 1.5 (29)  | 30.2 (35) | 1.6 (55)  | 2.1 (89)  | 6.0 (82)  | 2.6 (47)  |
| 35   | Tachyarrhythmia (050070)                                                                                                 | I456, I47*, I48, I490, I491, I492, I493, I494, I498                                                                                      | 7 779  | 0.7 | 65.5 (30)                                                 | 1.4 (58)        | 2.5 (22)  | 33.3 (29) | 6.7 (25)  | 21.6 (56) | 9.0 (62)  | 2.2 (51)  |
| 36   | Bradyarrhythmia (050210)                                                                                                 | I440, I441, I442, I443, I444, I445, I446, I447, I450, I451, I452, I453, I454, I455, I458, I459, I46*, I495, T821                         | 7 331  | 0.6 | 85.8 (5)                                                  | 1.8 (43)        | 16.0 (4)  | 47.0 (17) | 16.3 (9)  | 62.3 (15) | 13.0 (50) | 17.1 (19) |
| 37   | Premature labour, threatened premature labour (120170)                                                                   | O470, O471, O479, O60                                                                                                                    | 7 161  | 0.6 | 0.0 (95)                                                  | 0.5 (87)        | 0.0 (82)  | 13.7 (71) | 0.0 (97)  | 17.9 (59) | 16.0 (34) | 0.0 (85)  |
| 38   | Other infectious disease                                                                                                 | A060, A061, A062, A063, A067, A068, A069, A07*,                                                                                          | 6 959  | 0.6 | 22.5 (82)                                                 | 0.3 (93)        | 0.8 (38)  | 11.6 (82) | 1.9 (51)  | 9.3 (73)  | 6.0 (82)  | 5.1 (36)  |

Supplemental Table

| Rank | Clinical diagnosis (Disease code)                                         | ICD-10 codes                                                                                                                                                                                                                                                                                                                                                                                                                                                                                                                                                                                                                                                                                                                                                                                                                                                                                                                                                                                                                                                                                        | N     | %   | Clinical and procedural characteristics, %/median, (rank) |                 |           |           |          |           |           |           |  |
|------|---------------------------------------------------------------------------|-----------------------------------------------------------------------------------------------------------------------------------------------------------------------------------------------------------------------------------------------------------------------------------------------------------------------------------------------------------------------------------------------------------------------------------------------------------------------------------------------------------------------------------------------------------------------------------------------------------------------------------------------------------------------------------------------------------------------------------------------------------------------------------------------------------------------------------------------------------------------------------------------------------------------------------------------------------------------------------------------------------------------------------------------------------------------------------------------------|-------|-----|-----------------------------------------------------------|-----------------|-----------|-----------|----------|-----------|-----------|-----------|--|
|      |                                                                           |                                                                                                                                                                                                                                                                                                                                                                                                                                                                                                                                                                                                                                                                                                                                                                                                                                                                                                                                                                                                                                                                                                     |       |     | Age ≥ 65                                                  | Comorbid Mental | Deep Coma | Ambulance | Tertiary | Surgery   | LOS       | Mortality |  |
|      | (excluding fungal infection) (180030)                                     | A180, A181, A184, A185, A186, A187, A188, A20*, A21*, A22*, A23*, A24*, A25*, A26*, A27*, A28*, A30*, A311, A318, A320, A328, A329, A33, A34, A35, A36*, A371, A38, A42*, A43*, A44*, A482, A484, A488, A49*, A68*, A690, A692, A698, A699, A70, A748, A749, A75*, A77*, A78, A79*, A90, A91, A92*, A93*, A94, A95*, A96*, A98*, A99, B001, B002, B008, B009, B03, B04, B07, B080, B081, B082, B084, B085, B088, B09, B258, B259, B260, B268, B269, B33*, B34*, B35*, B36*, B370, B372, B373, B374, B378, B379, B380, B381, B382, B383, B388, B389, B390, B391, B392, B394, B395, B399, B400, B401, B402, B403, B408, B409, B410, B418, B419, B420, B421, B428, B429, B430, B432, B438, B439, B442, B448, B449, B460, B461, B462, B463, B465, B468, B469, B47*, B48*, B49, B50*, B51*, B52*, B53*, B54, B55*, B56*, B57*, B580, B581, B583, B588, B589, B60*, B64, B650, B651, B652, B653, B658, B660, B661, B662, B663, B665, B668, B669, B67*, B68*, B69*, B70*, B71*, B72, B73, B74*, B75, B76*, B77*, B78*, B79, B80, B81*, B82*, B83*, B85*, B86, B87*, B88*, B90*, B91, B92, B94*, T793, U049 |       |     |                                                           |                 |           |           |          |           |           |           |  |
| 39   | Complications due to operation and procedure (180040)                     | T80*, T81*, T820, T822, T823, T824, T825, T826, T827, T828, T829, T83*, T84*, T85*, T86*, T87*, T880, T881, T882, T883, T884, T885, T886, T888, T889                                                                                                                                                                                                                                                                                                                                                                                                                                                                                                                                                                                                                                                                                                                                                                                                                                                                                                                                                | 6 943 | 0.6 | 53.2 (54)                                                 | 1.3 (60)        | 0.6 (45)  | 12.5 (80) | 2.0 (48) | 60.0 (19) | 10.0 (55) | 2.3 (49)  |  |
| 40   | Pancreas and spleen tumor (06007x)                                        | C25*, C261, D136, D137, D377                                                                                                                                                                                                                                                                                                                                                                                                                                                                                                                                                                                                                                                                                                                                                                                                                                                                                                                                                                                                                                                                        | 6 815 | 0.6 | 72.6 (17)                                                 | 1.9 (40)        | 0.6 (45)  | 12.0 (81) | 0.6 (78) | 41.2 (31) | 22.0 (18) | 34.9 (5)  |  |
| 41   | Drug poisoning (161070)                                                   | T36*, T37*, T38*, T39*, T40*, T41*, T42*, T43*, T44*, T45*                                                                                                                                                                                                                                                                                                                                                                                                                                                                                                                                                                                                                                                                                                                                                                                                                                                                                                                                                                                                                                          | 6 748 | 0.6 | 13.4 (86)                                                 | 33.7 (1)        | 26.2 (2)  | 74.1 (2)  | 37.8 (1) | 1.7 (91)  | 2.0 (100) | 0.3 (74)  |  |
| 42   | Peritonitis, abdominal abscess (excluding female genital organs) (060370) | A183, K630, K631, K632, K65*, K67*                                                                                                                                                                                                                                                                                                                                                                                                                                                                                                                                                                                                                                                                                                                                                                                                                                                                                                                                                                                                                                                                  | 6 746 | 0.6 | 48.0 (59)                                                 | 1.6 (47)        | 1.0 (33)  | 28.5 (37) | 7.0 (24) | 56.6 (21) | 16.0 (34) | 7.7 (32)  |  |
| 43   | Acute pancreatitis (060350)                                               | B263, K85, K863, K871                                                                                                                                                                                                                                                                                                                                                                                                                                                                                                                                                                                                                                                                                                                                                                                                                                                                                                                                                                                                                                                                               | 6 494 | 0.6 | 43.6 (64)                                                 | 3.9 (7)         | 0.3 (60)  | 24.3 (44) | 4.5 (30) | 17.2 (61) | 14.0 (44) | 2.8 (45)  |  |
| 44   | Type 2 diabetes (excluding diabetic ketoacidosis) (100070)                | E112, E113, E114, E115, E116, E117, E118, E119                                                                                                                                                                                                                                                                                                                                                                                                                                                                                                                                                                                                                                                                                                                                                                                                                                                                                                                                                                                                                                                      | 6 265 | 0.5 | 58.1 (48)                                                 | 3.9 (7)         | 1.0 (33)  | 18.5 (57) | 1.0 (68) | 8.9 (74)  | 18.0 (27) | 0.9 (62)  |  |
| 45   | Inflammation with cerebrospinal infection (010080)                        | A066, A321, A390, A80*, A82*, A838, A839, A858, A88*, A89, B003, B004, B005, B010, B011, B020, B021, B050, B051, B060, B261, B262, B375, B384, B431, B582, G00*, G02*, G03*, G041, G042, G048, G049, G05*, G06*, G07, G08, G09, G958                                                                                                                                                                                                                                                                                                                                                                                                                                                                                                                                                                                                                                                                                                                                                                                                                                                                | 5 850 | 0.5 | 15.0 (85)                                                 | 1.3 (60)        | 4.0 (14)  | 20.8 (50) | 4.6 (28) | 8.0 (77)  | 9.0 (62)  | 2.2 (51)  |  |
| 46   | Subarachnoid haemorrhage, ruptured cerebral aneurysm (010020)             | I60*                                                                                                                                                                                                                                                                                                                                                                                                                                                                                                                                                                                                                                                                                                                                                                                                                                                                                                                                                                                                                                                                                                | 5 779 | 0.5 | 47.9 (60)                                                 | 0.8 (76)        | 33.9 (1)  | 76.0 (1)  | 30.3 (2) | 73.2 (11) | 28.0 (4)  | 26.9 (9)  |  |
| 47   | Bacterial enteritis (150020)                                              | A00*, A01*, A020, A022, A028, A029, A030, A031, A032, A033, A038, A039, A040, A041, A042, A043, A044, A045, A046, A047, A048, A049, A050, A052,                                                                                                                                                                                                                                                                                                                                                                                                                                                                                                                                                                                                                                                                                                                                                                                                                                                                                                                                                     | 5 632 | 0.5 | 25.1 (78)                                                 | 0.8 (76)        | 0.2 (68)  | 13.1 (74) | 0.6 (78) | 1.7 (91)  | 6.0 (82)  | 1.0 (60)  |  |



1  
2  
3  
4  
5  
6  
7  
8  
9  
10  
11  
12  
13  
14  
15  
16  
17  
18  
19  
20  
21  
22  
23  
24  
25  
26  
27  
28  
29  
30  
31  
32  
33  
34  
35  
36  
37  
38  
39  
40  
41  
42  
43  
44  
45  
46  
47  
48  
49

## Supplemental Table

| Rank | Clinical diagnosis (Disease code)                | ICD-10 codes                                                                                                                                                                                                                                                                                                                                                                                                                                                                                                                                                                                                                                                                                                                                                                                                                                                                                                                                                                                                                                                                                                                                                                                                                                                                                                                                                                                                                                                                      | N     | %   | Clinical and procedural characteristics, %/median, (rank) |                 |           |           |           |           |           |           |  |
|------|--------------------------------------------------|-----------------------------------------------------------------------------------------------------------------------------------------------------------------------------------------------------------------------------------------------------------------------------------------------------------------------------------------------------------------------------------------------------------------------------------------------------------------------------------------------------------------------------------------------------------------------------------------------------------------------------------------------------------------------------------------------------------------------------------------------------------------------------------------------------------------------------------------------------------------------------------------------------------------------------------------------------------------------------------------------------------------------------------------------------------------------------------------------------------------------------------------------------------------------------------------------------------------------------------------------------------------------------------------------------------------------------------------------------------------------------------------------------------------------------------------------------------------------------------|-------|-----|-----------------------------------------------------------|-----------------|-----------|-----------|-----------|-----------|-----------|-----------|--|
|      |                                                  |                                                                                                                                                                                                                                                                                                                                                                                                                                                                                                                                                                                                                                                                                                                                                                                                                                                                                                                                                                                                                                                                                                                                                                                                                                                                                                                                                                                                                                                                                   |       |     | Age ≥ 65                                                  | Comorbid Mental | Deep Coma | Ambulance | Tertiary  | Surgery   | LOS       | Mortality |  |
|      |                                                  | A053, A054, A058, A059                                                                                                                                                                                                                                                                                                                                                                                                                                                                                                                                                                                                                                                                                                                                                                                                                                                                                                                                                                                                                                                                                                                                                                                                                                                                                                                                                                                                                                                            |       |     |                                                           |                 |           |           |           |           |           |           |  |
| 48   | Herpes zoster (080020)                           | B022, B023, B027, B028, B029                                                                                                                                                                                                                                                                                                                                                                                                                                                                                                                                                                                                                                                                                                                                                                                                                                                                                                                                                                                                                                                                                                                                                                                                                                                                                                                                                                                                                                                      | 5 542 | 0.5 | 63.3 (38)                                                 | 2.6 (22)        | 0.0 (82)  | 2.8 (97)  | 0.1 (91)  | 0.9 (94)  | 8.0 (70)  | 0.1 (82)  |  |
| 49   | Respiratory failure (040130)                     | J96*                                                                                                                                                                                                                                                                                                                                                                                                                                                                                                                                                                                                                                                                                                                                                                                                                                                                                                                                                                                                                                                                                                                                                                                                                                                                                                                                                                                                                                                                              | 5 501 | 0.5 | 71.4 (20)                                                 | 2.7 (19)        | 9.5 (7)   | 42.3 (22) | 11.3 (13) | 10.9 (69) | 14.0 (44) | 21.8 (14) |  |
| 50   | Upper urinary tract disease (11012x)             | D301, D302, N132, N20*, N281, N288                                                                                                                                                                                                                                                                                                                                                                                                                                                                                                                                                                                                                                                                                                                                                                                                                                                                                                                                                                                                                                                                                                                                                                                                                                                                                                                                                                                                                                                | 5 291 | 0.5 | 28.8 (75)                                                 | 0.7 (82)        | 0.2 (68)  | 21.8 (48) | 0.9 (71)  | 38.9 (34) | 4.0 (95)  | 0.1 (82)  |  |
| 51   | Interstitial pneumonia (040110)                  | J60, J61, J62*, J63*, J64, J65, J66*, J67*, J68*, J70*, J82, J84*, J990, J991                                                                                                                                                                                                                                                                                                                                                                                                                                                                                                                                                                                                                                                                                                                                                                                                                                                                                                                                                                                                                                                                                                                                                                                                                                                                                                                                                                                                     | 5 266 | 0.5 | 78.8 (10)                                                 | 2.1 (31)        | 1.0 (33)  | 21.2 (49) | 4.6 (28)  | 6.3 (81)  | 21.0 (20) | 25.3 (11) |  |
| 52   | Ischemic enterocolitis (060190)                  | K55*                                                                                                                                                                                                                                                                                                                                                                                                                                                                                                                                                                                                                                                                                                                                                                                                                                                                                                                                                                                                                                                                                                                                                                                                                                                                                                                                                                                                                                                                              | 5 265 | 0.5 | 63.4 (37)                                                 | 1.1 (68)        | 0.6 (45)  | 17.3 (63) | 2.4 (39)  | 11.1 (68) | 10.0 (55) | 4.1 (38)  |  |
| 53   | Malignant tumour of gallbladder (060060)         | C23, C24*                                                                                                                                                                                                                                                                                                                                                                                                                                                                                                                                                                                                                                                                                                                                                                                                                                                                                                                                                                                                                                                                                                                                                                                                                                                                                                                                                                                                                                                                         | 5 159 | 0.4 | 84.1 (7)                                                  | 1.3 (60)        | 0.3 (60)  | 13.1 (74) | 0.8 (73)  | 58.2 (20) | 23.0 (11) | 28.8 (8)  |  |
| 54   | Brain tumour (010010)                            | C700, C709, C71*, C722, C723, C724, C793, D320, D329, D330, D331, D332, D333, D337, D339, D420, D429, D430, D431, D432, D433, D437, D439, G131, G132                                                                                                                                                                                                                                                                                                                                                                                                                                                                                                                                                                                                                                                                                                                                                                                                                                                                                                                                                                                                                                                                                                                                                                                                                                                                                                                              | 4 883 | 0.4 | 47.6 (62)                                                 | 1.7 (44)        | 3.2 (18)  | 28.2 (38) | 4.4 (31)  | 34.2 (40) | 23.0 (11) | 17.1 (19) |  |
| 55   | Spinal stenosis (including spondylosis) (07034x) | G551, G552, G553, G558, G950, G951, G952, G959, M4320, M4321, M4322, M4323, M4324, M4325, M4326, M4327, M4328, M4329, M4700, M4701, M4702, M4703, M4704, M4705, M4706, M4707, M4708, M4709, M4710, M4711, M4712, M4713, M4714, M4715, M4716, M4717, M4718, M4719, M4720, M4721, M4722, M4723, M4724, M4725, M4726, M4727, M4728, M4729, M4780, M4781, M4782, M4783, M4784, M4785, M4786, M4787, M4788, M4789, M4790, M4791, M4792, M4793, M4794, M4795, M4796, M4797, M4798, M4799, M4800, M4801, M4802, M4803, M4804, M4805, M4806, M4807, M4808, M4809, M4810, M4811, M4812, M4813, M4814, M4815, M4816, M4817, M4818, M4819, M4820, M4821, M4822, M4823, M4824, M4825, M4826, M4827, M4828, M4829, M4830, M4831, M4832, M4833, M4834, M4835, M4836, M4837, M4838, M4839, M4840, M4841, M4842, M4843, M4844, M4845, M4846, M4847, M4848, M4849, M4850, M4851, M4852, M4853, M4854, M4855, M4856, M4857, M4858, M4859, M4880, M4881, M4882, M4883, M4884, M4885, M4886, M4887, M4888, M4889, M4890, M4891, M4892, M4893, M4894, M4895, M4896, M4897, M4898, M4899, M4940, M4941, M4942, M4943, M4944, M4945, M4946, M4947, M4948, M4949, M4980, M4981, M4982, M4983, M4984, M4985, M4986, M4987, M4988, M4989, M5300, M5301, M5302, M5303, M5304, M5305, M5306, M5307, M5308, M5309, M5310, M5311, M5312, M5313, M5314, M5315, M5316, M5317, M5318, M5319, M5330, M5331, M5332, M5333, M5334, M5335, M5336, M5337, M5338, M5339, M5380, M5381, M5382, M5383, M5384, M5385, M5386 | 4 807 | 0.4 | 77.3 (12)                                                 | 2.0 (37)        | 0.0 (82)  | 23.6 (45) | 1.0 (68)  | 23.5 (52) | 20.0 (25) | 0.5 (69)  |  |



## Supplemental Table

| Rank | Clinical diagnosis (Disease code)                                                              | ICD*10 codes                                                                                                                                                                                                                                                                                                                                                                                                                                                                                                                                                                                                                                                | N     | %   | Clinical and procedural characteristics, %/median, (rank) |                 |           |           |          |           |           |           |  |
|------|------------------------------------------------------------------------------------------------|-------------------------------------------------------------------------------------------------------------------------------------------------------------------------------------------------------------------------------------------------------------------------------------------------------------------------------------------------------------------------------------------------------------------------------------------------------------------------------------------------------------------------------------------------------------------------------------------------------------------------------------------------------------|-------|-----|-----------------------------------------------------------|-----------------|-----------|-----------|----------|-----------|-----------|-----------|--|
|      |                                                                                                |                                                                                                                                                                                                                                                                                                                                                                                                                                                                                                                                                                                                                                                             |       |     | Age ≥ 65                                                  | Comorbid Mental | Deep Coma | Ambulance | Tertiary | Surgery   | LOS       | Mortality |  |
|      |                                                                                                | M5387, M5388, M5389, M5390, M5391, M5392, M5393, M5394, M5395, M5396, M5397, M5398, M5399, M9950, M9951, M9952, M9953, M9954, M9955, M9956, M9957, M9958, M9959, M9960, M9961, M9962, M9963, M9964, M9965, M9966, M9967, M9968, M9969, M9970, M9971, M9972, M9973, M9974, M9975, M9976, M9977, M9978, M9979                                                                                                                                                                                                                                                                                                                                                 |       |     |                                                           |                 |           |           |          |           |           |           |  |
| 56   | Anaemia (I30090)                                                                               | D500, D501, D508, D509, D510, D511, D512, D513, D518, D519, D520, D521, D528, D529, D530, D531, D532, D538, D539, D550, D551, D552, D559, D560, D561, D562, D563, D564, D569, D570, D571, D572, D573, D580, D581, D582, D588, D589, D590, D591, D592, D593, D594, D595, D596, D599, D62, D640, D641, D642, D643, D644, D648, D649                                                                                                                                                                                                                                                                                                                           | 4 756 | 0.4 | 63.1 (40)                                                 | 2.0 (37)        | 0.6 (45)  | 18.6 (56) | 1.9 (51) | 37.7 (36) | 11.0 (51) | 3.8 (39)  |  |
| 57   | Maternal care related to the fetus and amniotic cavity and possible delivery problems (I20180) | O30*, O31*, O32*, O33*, O34*, O35*, O36*, O40, O41*, O42*, O43*, O44*, O45*, O46*, O48                                                                                                                                                                                                                                                                                                                                                                                                                                                                                                                                                                      | 4 658 | 0.4 | 0.0 (95)                                                  | 0.4 (90)        | 0.0 (82)  | 13.3 (73) | 0.1 (91) | 70.6 (12) | 9.0 (62)  | 0.0 (85)  |  |
| 58   | Malignant tumour of rectum and anus (rectosigmoid colon to anus) (O60040)                      | C19, C20, C21*, D011, D012, D013, D014                                                                                                                                                                                                                                                                                                                                                                                                                                                                                                                                                                                                                      | 4 646 | 0.4 | 63.6 (35)                                                 | 1.9 (40)        | 0.4 (52)  | 14.6 (68) | 1.1 (65) | 49.8 (25) | 23.0 (11) | 21.0 (16) |  |
| 59   | Nontraumatic subdural haemorrhage (O10050)                                                     | I620, I621                                                                                                                                                                                                                                                                                                                                                                                                                                                                                                                                                                                                                                                  | 4 606 | 0.4 | 85.8 (5)                                                  | 2.2 (30)        | 2.7 (20)  | 27.9 (39) | 9.7 (18) | 92.6 (4)  | 10.0 (55) | 1.9 (54)  |  |
| 60   | Acute renal failure (I10290)                                                                   | K767, N17*                                                                                                                                                                                                                                                                                                                                                                                                                                                                                                                                                                                                                                                  | 4 034 | 0.3 | 70.1 (21)                                                 | 3.0 (16)        | 2.7 (20)  | 31.5 (32) | 7.3 (23) | 27.0 (49) | 15.0 (38) | 14.2 (22) |  |
| 61   | Intervertebral disk degeneration, disk herniation (O70350)                                     | M50*, M51*                                                                                                                                                                                                                                                                                                                                                                                                                                                                                                                                                                                                                                                  | 4 004 | 0.3 | 20.2 (84)                                                 | 1.6 (47)        | 0.0 (82)  | 27.4 (40) | 0.2 (89) | 28.8 (47) | 15.0 (38) | 0.0 (85)  |  |
| 62   | Autoimmune disease with systemic organ disease (O70560)                                        | D86*, I00, L88, L92*, L93*, L940, L941, L942, L943, L95*, L982, L983, M0200, M0208, M0209, M0210, M0218, M0219, M0220, M0228, M0229, M0280, M0288, M0289, M0290, M0298, M0299, M0300, M0310, M0320, M0360, M0720, M0740, M0748, M0749, M0750, M0758, M0759, M0760, M0768, M0769, M0830, M0838, M0839, M0840, M0848, M0849, M0880, M0888, M0889, M0890, M0898, M0899, M091*, M092*, M098*, M120*, M121*, M1230, M1238, M1239, M1300, M1302, M1303, M1305, M1310, M1380, M1390, M150, M153, M154, M158, M159, M1900, M300, M301, M302, M308, M31*, M32*, M330, M331, M332, M339, M34*, M350, M351, M352, M353, M354, M355, M356, M357, M358, M359, M36*, M633 | 3 864 | 0.3 | 45.3 (63)                                                 | 3.0 (16)        | 0.5 (50)  | 12.9 (76) | 1.8 (53) | 11.6 (66) | 21.0 (20) | 4.5 (37)  |  |
| 63   | Peritonsillar abscess (O30240)                                                                 | J36                                                                                                                                                                                                                                                                                                                                                                                                                                                                                                                                                                                                                                                         | 3 811 | 0.3 | 10.3 (89)                                                 | 0.3 (93)        | 0.0 (82)  | 2.3 (98)  | 0.2 (89) | 35.0 (39) | 6.0 (82)  | 0.0 (85)  |  |
| 64   | Dystocia with complication of labour or obstetric operation (I20260)                           | O61*, O62*, O63*, O64*, O65*, O66*, O67*, O68*, O69*, O70*, O71*, O720, O721, O722, O73*, O74*, O75*, O81*, O82*, O83*, O84*                                                                                                                                                                                                                                                                                                                                                                                                                                                                                                                                | 3 646 | 0.3 | 0.0 (95)                                                  | 0.4 (90)        | 0.0 (82)  | 13.6 (72) | 0.5 (80) | 84.8 (7)  | 8.0 (70)  | 0.0 (85)  |  |

1  
2  
3  
4  
5  
6  
7  
8  
9  
10  
11  
12  
13  
14  
15  
16  
17  
18  
19  
20  
21  
22  
23  
24  
25  
26  
27  
28  
29  
30  
31  
32  
33  
34  
35  
36  
37  
38  
39  
40  
41  
42  
43  
44  
45  
46  
47  
48  
49

Supplemental Table

| Rank | Clinical diagnosis (Disease code)                                                   | ICD-10 codes                                                                                                                                                                                                                                                                                  | N     | %   | Clinical and procedural characteristics, %/median, (rank) |                 |           |           |           |           |           |           |
|------|-------------------------------------------------------------------------------------|-----------------------------------------------------------------------------------------------------------------------------------------------------------------------------------------------------------------------------------------------------------------------------------------------|-------|-----|-----------------------------------------------------------|-----------------|-----------|-----------|-----------|-----------|-----------|-----------|
|      |                                                                                     |                                                                                                                                                                                                                                                                                               |       |     | Age ≥ 65                                                  | Comorbid Mental | Deep Coma | Ambulance | Tertiary  | Surgery   | LOS       | Mortality |
| 65   | Disseminated intravascular coagulation (I30100)                                     | D65, D683, O723                                                                                                                                                                                                                                                                               | 3 631 | 0.3 | 72.0 (18)                                                 | 2.1 (31)        | 8.3 (8)   | 45.5 (18) | 13.9 (11) | 49.6 (26) | 23.0 (11) | 46.0 (1)  |
| 66   | Other humoral/electrolyte/acid–base balance disorders (I00393)                      | E870, E871, E872, E873, E874, E875, E877, E878                                                                                                                                                                                                                                                | 3 622 | 0.3 | 61.5 (45)                                                 | 7.0 (4)         | 4.0 (14)  | 32.3 (30) | 8.3 (20)  | 4.6 (86)  | 8.0 (70)  | 2.7 (46)  |
| 67   | Kawasaki disease (I500709)                                                          | M303                                                                                                                                                                                                                                                                                          | 3 576 | 0.3 | 0.0 (95)                                                  | 0.0 (98)        | 0.0 (82)  | 2.1 (99)  | 0.0 (97)  | 0.8 (95)  | 11.0 (51) | 0.0 (85)  |
| 68   | Retinal detachment (O20160)                                                         | H330, H332, H333, H334, H335                                                                                                                                                                                                                                                                  | 3 566 | 0.3 | 23.4 (80)                                                 | 0.3 (93)        | 0.0 (82)  | 0.2 (100) | 0.0 (97)  | 99.2 (1)  | 14.0 (44) | 0.0 (85)  |
| 69   | Non–Hodgkin lymphoma (I30030)                                                       | C820, C821, C822, C827, C829, C830, C831, C832, C833, C834, C835, C836, C837, C838, C839, C840, C841, C842, C843, C844, C845, C850, C851, C857, C859                                                                                                                                          | 3 492 | 0.3 | 68.0 (24)                                                 | 1.7 (44)        | 0.7 (41)  | 13.9 (70) | 2.0 (48)  | 38.5 (35) | 29.0 (3)  | 24.3 (13) |
| 70   | Sudden idiopathic hearing loss (O30428)                                             | H912                                                                                                                                                                                                                                                                                          | 3 489 | 0.3 | 33.9 (71)                                                 | 0.6 (85)        | 0.0 (82)  | 5.3 (94)  | 0.1 (91)  | 2.1 (89)  | 10.0 (55) | 0.0 (85)  |
| 71   | Hypertension or other diseases associated with pregnancy/labour/puerperium (I20160) | O10*, O11, O12*, O13, O14*, O15*, O16, O21*, O22*, O23*, O25, O26*                                                                                                                                                                                                                            | 3 480 | 0.3 | 0.1 (93)                                                  | 0.8 (76)        | 0.1 (75)  | 10.7 (84) | 0.3 (87)  | 30.6 (45) | 9.0 (62)  | 0.0 (85)  |
| 72   | Other digestive tract disorders (O60570)                                            | K00*, K01*, K02*, K03*, K04*, K05*, K06*, K08*, K09*, K10*, K14*, K319, K590, K591, K592, K594, K598, K599, K629, K66*, K759, K764, K769, K918, K919                                                                                                                                          | 3 420 | 0.3 | 48.2 (58)                                                 | 2.6 (22)        | 0.3 (60)  | 17.7 (61) | 2.2 (43)  | 10.0 (72) | 8.0 (70)  | 2.0 (53)  |
| 73   | Arteriosclerosis obliterans (O50170)                                                | I700, I702, I708, I709, I720, I721, I724, I73*, I740, I741, I742, I743, I744, I745, I748, I749                                                                                                                                                                                                | 3 393 | 0.3 | 82.1 (9)                                                  | 1.1 (68)        | 0.6 (45)  | 22.9 (46) | 4.4 (31)  | 60.9 (18) | 18.0 (27) | 9.1 (28)  |
| 74   | Febrile convulsion (I50040)                                                         | R560                                                                                                                                                                                                                                                                                          | 3 365 | 0.3 | 0.1 (93)                                                  | 0.0 (98)        | 4.2 (13)  | 55.2 (9)  | 1.0 (68)  | 0.4 (98)  | 4.0 (95)  | 0.0 (85)  |
| 75   | Fracture/dislocation of ankle joint or foot (I60850)                                | M8437, S8250, S8260, S8280, S9200, S9210, S9220, S9230, S9240, S9250, S9270, S9290, S930, S931, S932, S933                                                                                                                                                                                    | 3 345 | 0.3 | 36.3 (69)                                                 | 2.1 (31)        | 0.0 (82)  | 28.8 (36) | 1.8 (53)  | 83.5 (8)  | 27.0 (5)  | 0.0 (85)  |
| 76   | Periarticular fracture/dislocation of knee (I60820)                                 | S7240, S8200, S8210, S8270                                                                                                                                                                                                                                                                    | 3 343 | 0.3 | 66.3 (29)                                                 | 2.4 (27)        | 0.2 (68)  | 38.6 (24) | 1.4 (60)  | 69.1 (13) | 35.0 (1)  | 0.4 (73)  |
| 77   | Influenza, viral pneumonia (O40070)                                                 | J10*, J11*, J12*                                                                                                                                                                                                                                                                              | 3 309 | 0.3 | 4.4 (92)                                                  | 0.3 (93)        | 0.3 (60)  | 6.8 (92)  | 0.1 (91)  | 1.2 (93)  | 6.0 (82)  | 0.2 (79)  |
| 78   | Multiple injuries (I60990)                                                          | S434, S435, S436, S437, S49*, S59*, S69*, S79*, S89*, S99*, T00*, T01*, T02*, T03*, T04*, T06*, T07                                                                                                                                                                                           | 3 254 | 0.3 | 57.3 (50)                                                 | 3.6 (10)        | 1.6 (26)  | 65.2 (5)  | 15.9 (10) | 40.5 (32) | 19.0 (26) | 0.8 (64)  |
| 79   | Fulminant hepatitis, acute liver failure, acute hepatitis (O60270)                  | B150, B159, B160, B161, B162, B169, B170, B171, B172, B178, B19*, B251, K710, K711, K712, K719, K720, K762, K763                                                                                                                                                                              | 3 212 | 0.3 | 28.8 (75)                                                 | 2.1 (31)        | 1.2 (31)  | 10.8 (83) | 2.8 (38)  | 6.8 (79)  | 14.0 (44) | 7.8 (31)  |
| 80   | Chronic obstructive lung disease (O40120)                                           | J43*, J44*                                                                                                                                                                                                                                                                                    | 3 165 | 0.3 | 87.7 (3)                                                  | 2.1 (31)        | 1.5 (29)  | 31.4 (33) | 3.8 (34)  | 4.7 (85)  | 15.0 (38) | 10.7 (25) |
| 81   | Unspecified injury (I61060)                                                         | T090, T091, T092, T093, T094, T095, T098, T099, T10*, T110, T119, T12*, T130, T131, T132, T133, T134, T135, T138, T139, T140, T141, T142*, T143, T144, T145, T146, T148, T149, T189, T288, T289, T66, T71, T73*, T751, T753, T758, T782, T783, T784, T788, T789, T794, T795, T797, T798, T799 | 3 127 | 0.3 | 32.7 (73)                                                 | 2.9 (18)        | 5.5 (12)  | 54.2 (10) | 20.1 (7)  | 25.7 (50) | 3.0 (98)  | 3.8 (39)  |
| 82   | Haemorrhage in early                                                                | O20*                                                                                                                                                                                                                                                                                          | 3 108 | 0.3 | 0.0 (95)                                                  | 0.4 (90)        | 0.0 (82)  | 5.2 (95)  | 0.1 (91)  | 8.3 (75)  | 9.0 (62)  | 0.0 (85)  |

Supplemental Table

| Rank | Clinical diagnosis (Disease code)                                                  | ICD-10 codes                                                                                                                                                                                                      | N     | %   | Clinical and procedural characteristics, %/median, (rank) |                 |           |           |           |           |           |           |  |
|------|------------------------------------------------------------------------------------|-------------------------------------------------------------------------------------------------------------------------------------------------------------------------------------------------------------------|-------|-----|-----------------------------------------------------------|-----------------|-----------|-----------|-----------|-----------|-----------|-----------|--|
|      |                                                                                    |                                                                                                                                                                                                                   |       |     | Age ≥ 65                                                  | Comorbid Mental | Deep Coma | Ambulance | Tertiary  | Surgery   | LOS       | Mortality |  |
|      | pregnancy (120150)                                                                 |                                                                                                                                                                                                                   |       |     |                                                           |                 |           |           |           |           |           |           |  |
| 83   | Leucocytic disease (130070)                                                        | D70, D720, D721, D728, D729                                                                                                                                                                                       | 3 049 | 0.3 | 48.9 (56)                                                 | 1.2 (66)        | 0.1 (75)  | 4.8 (96)  | 0.5 (80)  | 17.7 (60) | 7.0 (78)  | 2.9 (43)  |  |
| 84   | Dissecting aneurysm (050161)                                                       | I710                                                                                                                                                                                                              | 2 974 | 0.3 | 64.4 (32)                                                 | 1.6 (47)        | 2.2 (23)  | 58.8 (7)  | 21.5 (4)  | 33.7 (41) | 23.0 (11) | 10.2 (26) |  |
| 85   | Alcoholic liver disease (060280)                                                   | K70*                                                                                                                                                                                                              | 2 964 | 0.3 | 30.7 (74)                                                 | 14.7 (2)        | 1.6 (26)  | 25.2 (43) | 2.4 (39)  | 12.7 (64) | 14.0 (44) | 9.4 (27)  |  |
| 86   | Male genital diseases (11022x)                                                     | D294, I861, N41*, N43*, N44, N45*, N46, N47, N48*, N508                                                                                                                                                           | 2 841 | 0.2 | 53.3 (53)                                                 | 0.9 (73)        | 0.0 (82)  | 8.9 (89)  | 0.7 (75)  | 15.3 (62) | 8.0 (70)  | 0.3 (74)  |  |
| 87   | Pulmonary/mediastinal infection and abscess (040150)                               | A065, B440, B441, B45*, B659, B664, E321, E328, J850, J851, J852, J853, J86*, J985                                                                                                                                | 2 834 | 0.2 | 62.2 (42)                                                 | 2.6 (22)        | 0.7 (41)  | 20.4 (51) | 3.8 (34)  | 18.9 (58) | 24.0 (9)  | 11.4 (23) |  |
| 88   | Malignant tumour of oesophagus (including cervical region) (060010)                | C150, C151, C152, C153, C154, C155, C158, C159, D001                                                                                                                                                              | 2 805 | 0.2 | 66.6 (28)                                                 | 2.0 (37)        | 0.4 (52)  | 12.7 (77) | 0.7 (75)  | 36.5 (38) | 22.0 (18) | 30.9 (6)  |  |
| 89   | Pelvic injury (160980)                                                             | S321*, S322*, S323*, S324*, S325*, S327*, S328*, S332, S333, S334, S335, S336, S337, S348, S377*, S378*, S379*, S383, S39*                                                                                        | 2 783 | 0.2 | 67.7 (25)                                                 | 3.2 (13)        | 0.7 (41)  | 53.3 (12) | 10.2 (17) | 22.6 (54) | 25.0 (7)  | 1.0 (60)  |  |
| 90   | Muscle and tendon injury of the extremities (160610)                               | M620*, M621*, M623*, M626*, M628*, M629*, M660*, M661*, M662*, M663*, M664*, M665*, S46*, S534, S56*, S633, S634, S635, S636, S637, S66*, S731, S76*, S86*, S934, S935, S936, S96*, T112, T115                    | 2 700 | 0.2 | 33.3 (72)                                                 | 4.5 (5)         | 0.8 (38)  | 30.8 (34) | 3.6 (36)  | 55.5 (22) | 10.0 (55) | 0.6 (66)  |  |
| 91   | Retroperitoneal disease (110050)                                                   | C786, D200, D483                                                                                                                                                                                                  | 2 695 | 0.2 | 65.1 (31)                                                 | 1.6 (47)        | 0.4 (52)  | 12.7 (77) | 0.9 (71)  | 28.4 (48) | 21.0 (20) | 45.7 (2)  |  |
| 92   | Chemical poisoning (161070)                                                        | T46*, T47*, T48*, T49*, T50*, T51*, T52*, T53*, T54*, T55, T56*, T57*, T58, T59*, T60*, T61*, T62*, T63*, T64, T65*, T887                                                                                         | 2 694 | 0.2 | 40.5 (68)                                                 | 9.0 (3)         | 7.9 (10)  | 52.6 (13) | 21.3 (6)  | 12.7 (64) | 3.0 (98)  | 3.8 (39)  |  |
| 93   | Facial injury (including oral/pharyngeal injury) (160200)                          | S003, S004, S005, S012, S013, S014, S015, S022*, S023*, S024*, S025*, S026*, S027*, S028*, S029*, S041, S042, S043, S044, S045, S046, S047, S048, S049, S070, S078, S081, S088, S099, S100, S101, T180            | 2 576 | 0.2 | 24.3 (79)                                                 | 2.6 (22)        | 1.9 (25)  | 53.4 (11) | 11.3 (13) | 55.0 (24) | 5.0 (89)  | 0.6 (66)  |  |
| 94   | Malignant tumour of bone or soft tissue (excluding spine and spinal cord) (070040) | C400, C401, C402, C403, C408, C409, C413, C418, C419, C471, C472, C473, C474, C475, C476, C478, C479, C491, C492, C493, C494, C495, C496, C498, C499, C764, C765, C773, C774, C795, C96*, D092, D097              | 2 550 | 0.2 | 63.1 (40)                                                 | 3.5 (11)        | 0.2 (68)  | 17.5 (62) | 0.5 (80)  | 24.1 (51) | 25.0 (7)  | 24.4 (12) |  |
| 95   | Malignant prostatic tumour (110080)                                                | C61, C637, D075                                                                                                                                                                                                   | 2 549 | 0.2 | 90.3 (2)                                                  | 1.3 (60)        | 0.7 (41)  | 15.6 (65) | 0.5 (80)  | 23.1 (53) | 16.0 (34) | 21.8 (14) |  |
| 96   | Periarticular fracture/dislocation of elbow (160740)                               | S4240, S5200, S5210, S530, S531                                                                                                                                                                                   | 2 494 | 0.2 | 20.3 (83)                                                 | 0.7 (82)        | 0.0 (82)  | 18.8 (54) | 0.8 (73)  | 95.8 (2)  | 4.0 (95)  | 0.2 (79)  |  |
| 97   | Fracture of forearm (160760)                                                       | S5220, S5230, S5240, S5250, S5270, S5280, S5290                                                                                                                                                                   | 2 463 | 0.2 | 41.0 (67)                                                 | 0.5 (87)        | 0.1 (75)  | 27.1 (41) | 1.6 (55)  | 95.4 (3)  | 7.0 (78)  | 0.0 (85)  |  |
| 98   | Diabetic ketoacidosis, nonketotic coma (100040)                                    | E100, E101, E110, E111, E130, E131, E140, E141                                                                                                                                                                    | 2 444 | 0.2 | 41.7 (66)                                                 | 4.0 (6)         | 9.8 (6)   | 44.7 (20) | 10.4 (15) | 4.9 (84)  | 15.0 (38) | 3.4 (42)  |  |
| 99   | Other musculoskeletal/connective tissue diseases (071030)                          | M!!!!, M0000, M0008, M0009, M0010, M0018, M0019, M0020, M0028, M0029, M0080, M0088, M0089, M0090, M0098, M0099, M0100, M0108, M0109, M0110, M0118, M0119, M0120, M0128, M0129, M0130, M0138, M0139, M0140, M0148, | 2 389 | 0.2 | 47.7 (61)                                                 | 1.3 (60)        | 0.0 (82)  | 47.1 (16) | 0.5 (80)  | 5.5 (83)  | 8.0 (70)  | 0.5 (69)  |  |

## Supplemental Table

| Rank | Clinical diagnosis (Disease code)                    | ICD-10 codes                                                                                                                                                                                                                                                                                                                                                                                                                                                                                                                                                                                                                                                                                                                                                                                                                                                                                                                                                                                                                                                                                                                                                                                                                                                                                                                                                                                                                                                                                                                                                                                                                                | N     | %   | Clinical and procedural characteristics, %/median, (rank) |                 |           |           |          |          |           |           |  |
|------|------------------------------------------------------|---------------------------------------------------------------------------------------------------------------------------------------------------------------------------------------------------------------------------------------------------------------------------------------------------------------------------------------------------------------------------------------------------------------------------------------------------------------------------------------------------------------------------------------------------------------------------------------------------------------------------------------------------------------------------------------------------------------------------------------------------------------------------------------------------------------------------------------------------------------------------------------------------------------------------------------------------------------------------------------------------------------------------------------------------------------------------------------------------------------------------------------------------------------------------------------------------------------------------------------------------------------------------------------------------------------------------------------------------------------------------------------------------------------------------------------------------------------------------------------------------------------------------------------------------------------------------------------------------------------------------------------------|-------|-----|-----------------------------------------------------------|-----------------|-----------|-----------|----------|----------|-----------|-----------|--|
|      |                                                      |                                                                                                                                                                                                                                                                                                                                                                                                                                                                                                                                                                                                                                                                                                                                                                                                                                                                                                                                                                                                                                                                                                                                                                                                                                                                                                                                                                                                                                                                                                                                                                                                                                             |       |     | Age ≥ 65                                                  | Comorbid Mental | Deep Coma | Ambulance | Tertiary | Surgery  | LOS       | Mortality |  |
|      |                                                      | M0149, M0150, M0158, M0159, M0160, M0168, M0169, M0180, M0188, M0189, M0308, M0309, M0312, M0318, M0319, M0328, M0329, M0368, M0369, M1240, M1248, M1249, M1250, M1258, M1259, M1280, M1288, M1289, M1309, M1319, M1389, M1399, M1908, M1909, M1910, M1918, M1919, M1920, M1928, M1929, M1980, M1988, M1989, M1990, M1998, M1999, M2100, M2108, M2109, M2110, M2118, M2119, M2120, M2128, M2129, M2170, M2178, M2179, M2180, M2188, M2189, M2190, M2198, M2199, M2450, M2458, M2459, M2460, M2468, M2469, M2480, M2488, M2489, M2500, M2508, M2509, M2510, M2518, M2519, M2540, M2548, M2549, M2550, M2551, M2552, M2554, M2555, M2556, M2557, M2558, M2559, M2560, M2568, M2569, M2570, M2578, M2579, M2580, M2588, M2589, M2590, M2598, M2599, M540*, M541*, M542*, M543*, M544*, M545*, M546*, M548*, M549*, M671, M678, M679, M798*, M799*, M8300, M8301, M8302, M8303, M8304, M8305, M8307, M8308, M8309, M8310, M8311, M8312, M8313, M8314, M8315, M8317, M8318, M8319, M8320, M8321, M8322, M8323, M8324, M8325, M8327, M8328, M8329, M8330, M8331, M8332, M8333, M8334, M8335, M8337, M8338, M8339, M8340, M8341, M8342, M8343, M8344, M8345, M8347, M8348, M8349, M8350, M8351, M8352, M8353, M8354, M8355, M8357, M8358, M8359, M8380, M8381, M8382, M8383, M8384, M8385, M8387, M8388, M8389, M8390, M8391, M8392, M8393, M8394, M8395, M8397, M8398, M8399, M852*, M858*, M859*, M8600, M8800, M8801, M8802, M8803, M8804, M8805, M8806, M8807, M8809, M889*, M900*, M901*, M902*, M906*, M907*, M913*, M938, M951, M952, M953, M954, M955, M958, M959, M961, M966, M968, M969, M990*, M991*, M992*, M993*, M994*, M998*, M999* |       |     |                                                           |                 |           |           |          |          |           |           |  |
| 100  | Fracture or dislocation around the shoulder (160720) | M2431, M2441, S4220, S4230, S4270, S4280, S4290, S430, S431, S432, S433                                                                                                                                                                                                                                                                                                                                                                                                                                                                                                                                                                                                                                                                                                                                                                                                                                                                                                                                                                                                                                                                                                                                                                                                                                                                                                                                                                                                                                                                                                                                                                     | 2 370 | 0.2 | 68.9 (22)                                                 | 3.1 (15)        | 0.0 (82)  | 35.6 (26) | 2.2 (43) | 76.8 (9) | 21.0 (20) | 0.6 (66)  |  |

Rankings were based on data from the top 100 causes of admissions. Comorbidity of mental illness was defined as the following ICD-10 codes as comorbidities: unipolar depressive disorders (F32–F33), bipolar affective disorder (F30–F31), schizophrenia (F20–F29), alcohol use disorders (F10), drug use disorders (F11–F16 and F18–F19), post-traumatic stress disorder (F431), obsessive-compulsive disorder (F42), panic disorder (F40 and F410), or insomnia (F51). Deep coma was defined as a score on the Japan Soma Scale of 100 or more. Ambulance, ambulance service; LOS, median length of stay; Mortality, in-hospital mortality; Tertiary, tertiary emergency medical services; \*, wild card; M!!!!, ICD-10 code numbers starting with ‘M’ not elsewhere classified.



**Comparison of emergency hospital admissions for drug poisoning and major diseases: a retrospective observational study using a nationwide administrative discharge database**

|                                 |                                                                                                                                                                                                                                                                                                                                                                                                                                                                                                                                                                                                                                                                                                                  |
|---------------------------------|------------------------------------------------------------------------------------------------------------------------------------------------------------------------------------------------------------------------------------------------------------------------------------------------------------------------------------------------------------------------------------------------------------------------------------------------------------------------------------------------------------------------------------------------------------------------------------------------------------------------------------------------------------------------------------------------------------------|
| Journal:                        | <i>BMJ Open</i>                                                                                                                                                                                                                                                                                                                                                                                                                                                                                                                                                                                                                                                                                                  |
| Manuscript ID:                  | bmjopen-2012-001857.R1                                                                                                                                                                                                                                                                                                                                                                                                                                                                                                                                                                                                                                                                                           |
| Article Type:                   | Research                                                                                                                                                                                                                                                                                                                                                                                                                                                                                                                                                                                                                                                                                                         |
| Date Submitted by the Author:   | 16-Oct-2012                                                                                                                                                                                                                                                                                                                                                                                                                                                                                                                                                                                                                                                                                                      |
| Complete List of Authors:       | Okumura, Yasuyuki; National Institute of Mental Health, National Center of Neurology and Psychiatry, Department of Social Psychiatry<br>Shimizu, Sayuri; Institute for Health Economics and Policy, Research Department<br>Ishikawa, Koichi; National Cancer Center, Statistics and Cancer Control Division<br>Matsuda, Shinya; University of Occupational and Environmental Health, Department of Preventive Medicine and Community Health<br>Fushimi, Kiyohide; Tokyo Medical and Dental University Graduate School of Medicine, Department of Health Policy and Informatics<br>Ito, Hiroto; National Institute of Mental Health, National Center of Neurology and Psychiatry, Department of Social Psychiatry |
| <b>Primary Subject Heading</b>: | Epidemiology                                                                                                                                                                                                                                                                                                                                                                                                                                                                                                                                                                                                                                                                                                     |
| Secondary Subject Heading:      | Mental health, Emergency medicine                                                                                                                                                                                                                                                                                                                                                                                                                                                                                                                                                                                                                                                                                |
| Keywords:                       | Suicide & self-harm < PSYCHIATRY, EPIDEMIOLOGY, HEALTH SERVICES ADMINISTRATION & MANAGEMENT                                                                                                                                                                                                                                                                                                                                                                                                                                                                                                                                                                                                                      |
|                                 |                                                                                                                                                                                                                                                                                                                                                                                                                                                                                                                                                                                                                                                                                                                  |

SCHOLARONE™  
Manuscripts

1  
2  
3  
4  
5  
6  
7  
8  
9  
10  
11  
12  
13  
14  
15  
16  
17  
18  
19  
20  
21  
22  
23  
24  
25  
26  
27  
28  
29  
30  
31  
32  
33  
34  
35  
36  
37  
38  
39  
40  
41  
42  
43  
44  
45  
46  
47  
48  
49  
50  
51  
52  
53  
54  
55  
56  
57  
58  
59  
60

# Comparison of emergency hospital admissions for drug poisoning and major diseases: a retrospective observational study using a nationwide administrative discharge database

Yasuyuki Okumura,<sup>1</sup> Sayuri Shimizu,<sup>2</sup> Koichi B. Ishikawa,<sup>3</sup> Shinya Matsuda,<sup>4</sup> Kiyohide Fushimi,<sup>5</sup> Hiroto Ito<sup>1</sup>

<sup>1</sup> Department of Social Psychiatry, National Institute of Mental Health, National Center of Neurology and Psychiatry, Tokyo 187-8553, Japan

<sup>2</sup> Research Department, Institute for Health Economics and Policy, Tokyo105-0003, Japan

<sup>3</sup> Statistics and Cancer Control Division, National Cancer Center, Tokyo 104-0045, Japan

<sup>4</sup> Department of Preventive Medicine and Community Health, University of Occupational and Environmental Health, Kitakyushu 807-8555, Japan

<sup>5</sup> Department of Health Policy and Informatics, Tokyo Medical and Dental University Graduate School of Medicine, Tokyo 113-8510, Japan

**Correspondence to** Yasuyuki Okumura, Department of Social Psychiatry, National Institute of Mental Health, National Center of Neurology and Psychiatry, 4-1-1 Ogawa-Higashi cho, Kodaira 187-8553, Tokyo, Japan; Tel.: + 81 42 346 2046; Fax: +81 42 346 2047; Email: yokumura@ncnp.go.jp

**Key words** Retrospective studies; overdose; emergency medical services; epidemiology

**Word count:** 2224 word

## ABSTRACT

**Objective:** To compare the clinical and procedural characteristics of emergency hospital admissions for drug poisoning and major diseases.

**Design:** Retrospective observational study.

**Setting:** Discharged patients from 855 acute care hospitals from 1 July to 31 December in 2008 in Japan.

**Results:** There were a total of 1 157 893 emergency hospital admissions. Among the top 100 causes, drug poisoning was ranked higher in terms of the percentage of patients using ambulance services (74.1%; 2nd) and tertiary emergency medical services (37.8%; 1st). Despite higher utilization of emergency care resources, drug poisoning ranked lower in terms of the median length of stay (2 days; 100th), percentage of requirement for surgical procedures (1.7%; 91st), and in-hospital mortality ratio (0.3%; 74th).

**Conclusion:** Drug poisoning is unique among the top 100 causes of emergency admissions. Our findings suggest that drug poisoning imposes a greater burden on emergency care resources but has a less severe clinical course than other causes of admissions. Future research should focus on strategies to reduce the burden of drug poisoning on emergency medical systems.

## Article Summary

### Article focus

■ Only a few multicenter studies have compared resource use and clinical course of emergency hospital admissions. Our aim was to compare the clinical and procedural characteristics of emergency hospital admissions for drug poisoning and major diseases by using a nationwide administrative discharge database.

### Key messages

■ Drug poisoning is in an anomalous position among the top 100 causes of emergency admissions.

■ Patients with drug poisoning had a less severe clinical course than those with other causes, although they had higher utilization of emergency care resources.

### Strengths and limitations of this study

■ A large data from a nationwide discharge database was studied.

■ Our results are limited to inpatient admissions to acute care hospitals.



## INTRODUCTION

A better understanding of epidemiology in emergency medical services (EMS) is important for planning EMS resource use and EMS personnel training needs.<sup>1</sup> Drug poisoning is a major cause of admissions to acute care hospitals and places a considerable burden on EMS resources. Drug poisoning accounts for over 15% of all admissions to intensive care units.<sup>2,3</sup> However, most cases of drug poisoning do not result in clinical toxicity. Of patients with drug poisoning admitted to an intensive care unit, 91% do not require advanced treatments.<sup>2</sup> Over 75% of patients admitted to emergency departments can be released from medical observation after a brief period (i.e., 1–2 days).<sup>4-6</sup> Less than 1% of cases result in mortality.<sup>7,8</sup> These previous studies suggest that drug poisoning may impose a needless burden on high-level EMS despite their limited requirements for advanced treatments.<sup>2,9</sup>

Although a number of studies have examined the detailed epidemiology of drug poisoning,<sup>2-8</sup> only a few multicenter studies have compared resource use and clinical course of emergency hospital admissions.<sup>10-12</sup> It remains unknown whether drug poisoning imposes a greater burden on emergency care resources and has a less severe clinical course among major causes of admissions. We thus aimed to compare the clinical and procedural characteristics of emergency hospital admissions for drug poisoning and major diseases by using a nationwide administrative discharge database.

## METHODS

### Data source

We conducted an observational study using the nationwide discharge administrative database of the Diagnosis Procedure Combination/Per-Diem Payment System (DPC/PDPS), a Japanese case-mix classification system launched in 2002 by the Ministry of Health, Labour and Welfare of Japan.<sup>13</sup> Every year, the DPC Research Group conducts a survey of DPC/PDPS hospitals. In 2008, 855 of 1 558 DPC/PDPS hospitals voluntarily participated in the survey. The DPC/PDPS database includes clinical and procedural information on *all* inpatients discharged from the participating hospitals between 1 July and 31 December. All the data for each patient were recorded at discharge. The database includes 2.86 million admissions, representing approximately 40% of all inpatient admissions to acute care hospitals in Japan (excluding psychiatric and tuberculosis hospitals).<sup>14</sup> In the present study, we included all emergency hospital admissions and excluded planned admissions to the DPC/PDPS hospitals.

### Setting

In Japan, the EMS system is divided into 3 categories:<sup>15</sup> (1) primary EMS that provides care to patients who can be discharged without hospitalization; (2) secondary EMS that provides care to patients who require admission to a regular inpatient bed; and (3) tertiary EMS that provides care to severely ill and trauma patients who require intensive care. In 2008, there were 18 892 clinics and 963 hospitals for primary EMS, 3 053 hospitals for secondary EMS, and 214 hospitals for tertiary EMS.<sup>14</sup> In the present study, we focused on secondary and tertiary EMS rather than primary EMS, because the DPC/PDPS database is an inpatient database. Among the 855 participating hospitals in the DPC/PDPS database, 130 provide tertiary EMS.

## Clinical and procedural characteristics

To describe clinical and procedural characteristics of emergency hospital admissions, we used the following study variables: (1) age; (2) gender; (3) major disease categories; (4) comorbidities at admissions; (5) level of consciousness assessed by the Japan Coma Scale (JCS);<sup>16</sup> (6) use of ambulance service; (7) use of tertiary EMS; (8) requirement for surgical procedures that include both major surgery and suturing in an emergency department; (9) length of stay (days); and (10) in-hospital mortality.

Physicians recorded information on diagnoses using the International Classification of Diseases 10th revision (ICD-10) codes. According to the ICD-10 codes, 506 major disease categories were defined in 2008 (see Supplemental Table). In the database, patients with drug, chemical, and unspecified poisoning (ICD-10 codes T360–T509, T510–T659, and T887, respectively) have the same major disease code (disease code 161070). In the present study, we modified the disease code to separate drug poisoning (modified disease code 161070a) from chemical and unspecified poisoning (modified disease code 161070b) according to their ICD-10 codes.

In the database, up to 4 diagnosed comorbidities per patient were recorded. Using the criteria developed by the Global Burden of Disease study with some modifications,<sup>17</sup> we defined comorbid status of mental illness as being diagnosed with any of the following ICD-10 codes: unipolar depressive disorders (F32–F33); bipolar affective disorder (F30–F31); schizophrenia (F20–F29); alcohol use disorders (F10); drug use disorders (F11–F16 and F18–F19); post-traumatic stress disorder (F431); obsessive-compulsive disorder (F42); panic disorder (F400 and F410); or insomnia (F51).

## Statistical analyses

First, we conducted univariate analyses to summarize the clinical and procedural characteristics of all emergency admissions. Second, we selected patients diagnosed with one of the top 100 major disease codes and calculated summary statistics of 8 variables by disease code. These variables were as follows: (1) percentage of patients aged 65 years or older; (2) percentage of patients comorbid with mental illness; (3) percentage of patients admitted to hospitals with deep coma (JCS scores  $\geq 100$ , corresponding to scores of  $\leq 7$  on the Glasgow Coma Scale);<sup>16</sup> (4) percentage of patients using ambulance services; (5) percentage of patients using tertiary EMS; (6) percentage of patients requiring surgical procedures; (7) median length of stay; and (8) percentage of in-hospital mortality. To maximize interpretability, we restricted this analysis to patients with one of the top 100 causes of admissions. We used a predictive principal component analysis (PCA) biplot to reduce the dimensionality of multivariate data (i.e., 100 causes of admissions  $\times$  8 variables) and then to visualize 2 dimensions with minimal loss of information.<sup>18</sup> Before conducting the predictive PCA biplot, we standardized each variable with a mean of 0 and a standard deviation of 1 because the measurement units of 8 variables were incommensurable. In the predictive PCA biplot, the 8 variables were represented by 8 biplot axes to read off predictive values of the variables for each of the top 100 causes. All statistical analyses were performed with R version 2.4.1.<sup>19</sup> The predictive PCA biplot was performed using the BiplotGUI package under R.<sup>19</sup>

## RESULTS

### Characteristics of all emergency hospital admissions

During the study period, there were a total of 1 157 893 emergency hospital admissions to 855 hospitals. Characteristics of these admissions are presented in Table 1. The majority (51.7%) of admissions were for patients aged  $\geq 65$  years. Patients aged 0–14 years accounted for less than one-sixth (15.3%) of the admissions. The most prevalent diagnosis was pneumonia, accounting for 10.2% of all admissions, followed by stroke (5.5%) and heart failure (2.8%). Drug poisoning ranked 41st among causes of admissions. Less than 5% of patients used tertiary EMS. Of those patients, 88.3% stayed for more than 3 days. About 7% of patients died during hospitalization.

-----  
Insert Table 1 here  
-----

### Comparison of drug poisoning and major diseases

The top 100 causes of admissions covered 83% (965 749 admissions) of all admissions. Characteristics by cause of admission are shown in Table 2 for the top 10 causes and drug poisoning; the top 100 causes are also shown in Supplemental Table. The predictive PCA biplot with 2 dimensions accounts for 62.9% of the variance in the data from the top 100 causes. The predictive PCA biplot revealed that drug poisoning was in a unique position (Figure 1). Among the top 100 causes, patients with drug poisoning were less likely to be aged  $\geq 65$  years (13.4%; 86th) and most likely to be diagnosed with mental illness (33.7%; 1st). In addition, patients with drug poisoning were more likely to be admitted to hospitals with deep coma (26.2%; 2nd), more likely to use ambulance services (74.1%; 2nd), and most likely to use tertiary EMS (37.8%; 1st).

1  
2  
3 Despite the higher utilization of emergency care resources, clinical course of drug poisoning was  
4  
5 less severe. Among the top 100 causes, patients with drug poisoning had the shortest median  
6  
7 length of stay (2 days; 100th), were less likely to require surgical procedures (1.7%; 91st), and  
8  
9 were less likely to die during hospitalization (0.3%; 74th).  
10  
11

12  
13 In terms of the percentage of patients admitted to tertiary EMS, subarachnoid haemorrhage  
14  
15 and ruptured cerebral aneurysm (disease code 010020) ranked second (30.3%; 2nd; see the 46th  
16  
17 row in Supplemental Table). Patients with subarachnoid haemorrhage and ruptured cerebral  
18  
19 aneurysm were most likely to be admitted to hospitals with deep coma (33.9%; 1st) and most  
20  
21 likely to use ambulance services (76.0%; 1st). They had a longer median length of stay (28 days;  
22  
23 4th), were more likely to require surgical procedures (73.2%; 11st), and were more likely to die  
24  
25 during hospitalization (26.9%; 9th).  
26  
27  
28  
29  
30  
31

32 -----  
33  
34 Insert Table 2 and Figure 1 here  
35  
36 -----  
37  
38  
39  
40  
41  
42  
43  
44  
45  
46  
47  
48  
49  
50  
51  
52  
53  
54  
55  
56  
57  
58  
59  
60

## DISCUSSION

To our knowledge, this is the first study that used a nationwide administrative discharge database to compare detailed clinical and procedural characteristics of emergency hospital admissions for drug poisoning and major diseases. We found that drug poisoning was unique among the top 100 causes of emergency admissions. Patients with drug poisoning had a less severe clinical course than those with other causes, although they had higher utilization of emergency care resources. Our findings suggest that drug poisoning imposes a higher burden on emergency care resources than other causes of emergency admissions.

Our results are consistent with those of a case-control study conducted in Australia and New Zealand.<sup>10</sup> That study found that the median length of stay in patients with drug poisoning was 3 days, which was much lower than the overall median length of stay (9 days) in patients with 1 of the 8 most common diagnoses in a tertiary intensive care unit. One possible explanation for the potential over-utilization of high-level EMS resources is that staff with significant experience in psychosocial assessment might be more available in high-level EMS facilities. In Japan, 85% of tertiary EMS hospitals have psychiatric departments, while 23% of secondary EMS hospitals are so equipped.<sup>14</sup> Because most patients with drug poisoning have attempted suicide,<sup>20</sup> and self-harm patients should receive a specialist psychosocial assessment according to the clinical guideline,<sup>21</sup> patients with drug poisoning are transferred to high-level EMS in which mental health specialists are more available.

Another explanation for the potential over-utilization may relate to difficulties that confront ambulance officers. First, staff in secondary EMS hospitals might decline to manage patients with drug poisoning. A survey conducted in Osaka city revealed that ambulance officers contacted more hospitals to transport patients with drug poisoning than all patients (average

1  
2  
3 number of contacted hospitals: 7.6 vs. 1.8, respectively).<sup>22</sup> Second, ambulance officers might  
4 transport patients with drug poisoning to high-level EMS because of their deep coma. Drug  
5 poisoning ranked within the top 2 in terms of the percentage of patients with deep coma and  
6 percentage of patients admitted to tertiary EMS. However, patients with drug poisoning had a  
7 less severe clinical course than those with other causes. For example, subarachnoid haemorrhage  
8 and ruptured cerebral aneurysm had the second highest percentage of patients admitted to tertiary  
9 EMS and had a much more severe clinical course than drug poisoning. It would be of great value  
10 to investigate triage tools predicting the need for advanced treatments based on information not  
11 only from early admission factors,<sup>23</sup> but also from pre-hospital factors.<sup>24</sup>  
12  
13  
14  
15  
16  
17  
18  
19  
20  
21  
22  
23  
24

25 Our study has several limitations. First, our results cannot be generalized and are limited to  
26 inpatient admissions to acute care hospitals rather than emergency outpatient admissions or  
27 emergency admissions to psychiatric hospitals, because we used the DPC/PDPS database.  
28  
29 Second, we were unable to evaluate variables not included in the DPC/PDPS database. As a  
30 result, we could not assess other potentially important factors predicting the need for advanced  
31 treatments, such as acute physiology and chronic health evaluation (APACHE) scores at  
32 admission<sup>23</sup> or clinical management and course during pre-hospital period.<sup>24</sup> Third, we  
33 included all types of drug poisoning (i.e., deliberate, accidental, and undetermined intent) as in a  
34 previous study,<sup>7</sup> because data on external causes (ICD-10 codes V01–Y98) are not recorded in  
35 the DPC/PDPS database. As a result, we could not distinguish between deliberate and accidental  
36 drug poisoning. Fourth, although the database included approximately 40% of all inpatient  
37 admissions in Japan, participation in the survey was voluntary for each hospital and the patient  
38 selection procedure was not based on a random sampling technique from all acute hospitals.  
39  
40  
41  
42  
43  
44  
45  
46  
47  
48  
49  
50  
51  
52  
53

54  
55 In conclusion, we have demonstrated that drug poisoning is unique among the top 100 causes  
56  
57  
58  
59  
60



1  
2  
3 of emergency admissions. Future research should focus on strategies to reduce the burden of  
4  
5  
6 drug poisoning on emergency medical systems.  
7  
8  
9  
10  
11  
12  
13  
14  
15  
16  
17  
18  
19  
20  
21  
22  
23  
24  
25  
26  
27  
28  
29  
30  
31  
32  
33  
34  
35  
36  
37  
38  
39  
40  
41  
42  
43  
44  
45  
46  
47  
48  
49  
50  
51  
52  
53  
54  
55  
56  
57  
58  
59  
60

For peer review only

## Acknowledgements

The authors would like to thank Dr. Toshie Noda for her feedbacks on an earlier draft of this article.

## Funding

Funding for administrating the study was supported by Grants-in-Aid for Research on Policy Planning and Evaluation (Japanese Ministry of Health, Labour and Welfare H22-SEISAKU-SITEI-031 and H24-SEISAKU-SITEI-012). Funding for writing this article was supported by a Health Labour Sciences Research Grant (H22-IYAKU-IPPAN-013) from the Ministry of Health, Labour and Welfare of Japan.

## Competing Interest

None.

## Ethic approval

The study protocol was approved by the institutional review board of the University of Occupational and Environmental Health, Fukuoka, Japan.

## Contributors

SM, KBI, and KF conducted data collection, data synthesis, and data management. KF and HI obtained funding. YO participated in study concept and design, analysis and interpretation of data, drafting of the manuscript, and critical revision of the manuscript. SS supervised data analysis. SS, KBI, KF, and HI participated in interpretation of data and critical revision of the

1  
2  
3 manuscript for important intellectual content. All authors contributed to and approved the final  
4  
5 manuscript.  
6  
7

### 8 9 **Provenance and peer review**

10  
11 Not commissioned; externally peer reviewed.  
12  
13

### 14 15 **Data sharing information**

16  
17 No additional data are available.  
18  
19  
20  
21  
22  
23  
24  
25  
26  
27  
28  
29  
30  
31  
32  
33  
34  
35  
36  
37  
38  
39  
40  
41  
42  
43  
44  
45  
46  
47  
48  
49  
50  
51  
52  
53  
54  
55  
56  
57  
58  
59  
60

## References

1. Platts-Mills TF, Leacock B, Cabanas JG, *et al.* Emergency medical services use by the elderly: analysis of a statewide database. *Prehosp Emerg Care* 2010;**14**:329-33.
2. Schwake L, Wollenschlager I, Stremmel W, *et al.* Adverse drug reactions and deliberate self-poisoning as cause of admission to the intensive care unit: a 1-year prospective observational cohort study. *Intensive Care Med* 2009;**35**:266-74.
3. McGrath J. A survey of deliberate self-poisoning. *Med J Aust* 1989;**150**:317-8, 320-1, 324.
4. Henderson A, Wright M, Pond SM. Experience with 732 acute overdose patients admitted to an intensive care unit over six years. *Med J Aust* 1993;**158**:28-30.
5. Hendrix L, Verelst S, Desruelles D, *et al.* Deliberate self-poisoning: characteristics of patients and impact on the emergency department of a large university hospital. *Emerg Med J* 2012.
6. Hollander JE, McCracken G, Johnson S, *et al.* Emergency department observation of poisoned patients: how long is necessary? *Acad Emerg Med* 1999;**6**:887-94.
7. Heyerdahl F, Bjornaas MA, Dahl R, *et al.* Repetition of acute poisoning in Oslo: 1-year prospective study. *Br J Psychiatry* 2009;**194**:73-9.
8. Xiang Y, Zhao W, Xiang H, *et al.* ED visits for drug-related poisoning in the United States, 2007. *Am J Emerg Med* 2011;**30**:293-301.
9. Hamad AE, Al-Ghadban A, Carvounis CP, *et al.* Predicting the need for medical intensive care monitoring in drug-overdosed patients. *J Intensive Care Med* 2000;**15**:321-328.
10. Flabouris A, Hart GK, George C. Outcomes of patients admitted to tertiary intensive care units after interhospital transfer: comparison with patients admitted from emergency departments. *Crit Care Resusc* 2008;**10**:97-105.

- 1  
2  
3 11. Spiller HA, Singleton MD. Comparison of incidence of hospital utilization for poisoning and  
4  
5 other injury types. *Public Health Rep* 2011;**126**:94-9.  
6  
7
- 8 12. Wadman MC, Muelleman RL, Coto JA, *et al*. The pyramid of injury: using ecodes to  
9  
10 accurately describe the burden of injury. *Ann Emerg Med* 2003;**42**:468-78.  
11  
12
- 13 13. Matsuda S, Ishikawa KB, Kuwabara K, *et al*. Development and use of the Japanese case-mix  
14  
15 system. *Eurohealth* 2008;**14**:25-30.  
16  
17
- 18 14. Statistics and Information Department, Minister's Secretariat, Ministry of Health, Labour and  
19  
20 Welfare. *2008 Summary of Static/Dynamic Surveys of Medical Institutions and Hospital*  
21  
22 *Report (in Japanese)*. Tokyo: Health and Welfare Statistics Association, 2010.  
23  
24
- 25 15. Japan International Cooperation Agency. Emergency medical care. *Japan's experiences in*  
26  
27 *public Health and medical systems: towards improving public health and medical systems in*  
28  
29 *developing countries*. Tokyo: Institute for International Cooperation, Japan International  
30  
31 Cooperation Agency, 2005:227-244.  
32  
33
- 34 16. Takeuchi E. Reliability of grading systems of impaired consciousness. Statistical evaluation  
35  
36 of inter-rater reliability and validity of the Japan coma scale (JCS) (in Japanese). *J Osaka*  
37  
38 *Medical College*, 1988:20-30.  
39  
40
- 41 17. World Health Organization. *The global burden of disease: 2004 update*: Author, 2004.  
42  
43
- 44 18. Gower J, Lubbe S, Roux NL. *Understanding biplots*: Wiley, 2011.  
45  
46
- 47 19. R Development Core Team. *R: A language and environment for statistical computing*. Vienna,  
48  
49 Austria: R Foundation for Statistical Computing, 2011.  
50  
51
- 52 20. Hirata K, Matsumoto Y, Tomioka J, *et al*. Acute drug poisoning at critical care departments in  
53  
54 Japan. *Jpn J Hosp Pharm* 1998;**24**:340-348.  
55  
56  
57  
58  
59  
60

- 1  
2  
3  
4  
5  
6  
7  
8  
9  
10  
11  
12  
13  
14  
15  
16  
17  
18  
19  
20  
21  
22  
23  
24  
25  
26  
27  
28  
29  
30  
31  
32  
33  
34  
35  
36  
37  
38  
39  
40  
41  
42  
43  
44  
45  
46  
47  
48  
49  
50  
51  
52  
53  
54  
55  
56  
57  
58  
59  
60
21. National Institute for Health and Clinical Excellence. *Self-harm: the short-term physical and psychological management and secondary prevention of self-harm in primary and secondary care*. Manchester: Author, 2004.
  22. Fire and Disaster Management Agency of the Ministry of Internal Affairs and Communications. *Reports on emergency medicine 2009* Tokyo, 2010.
  23. Eizadi Mood N, Sabzghabae AM, Khalili-Dehkordi Z. Applicability of different scoring systems in outcome prediction of patients with mixed drug poisoning-induced coma. *Indian J Anaesth* 2011;**55**:599-604.
  24. Gwini SM, Shaw D, Iqbal M, *et al*. Exploratory study of factors associated with adverse clinical features in patients presenting with non-fatal drug overdose/self-poisoning to the ambulance service. *Emerg Med J* 2011;**28**:892-4.

**Table 1** Characteristics of emergency hospital admissions

| Characteristic                                                                      | N of admissions | % of admissions | 95% CI    |
|-------------------------------------------------------------------------------------|-----------------|-----------------|-----------|
| Age                                                                                 |                 |                 |           |
| 0–14                                                                                | 177 092         | 15.3            | 15.2–15.4 |
| 15–64                                                                               | 382 025         | 33.0            | 32.9–33.1 |
| ≥ 65                                                                                | 598 776         | 51.7            | 51.6–51.8 |
| Gender women                                                                        | 547 280         | 47.3            | 47.2–47.3 |
| Top 10 causes of admissions and drug poisoning (Disease code)                       |                 |                 |           |
| 1. Pneumonia, acute bronchitis, acute bronchiolitis (040080)                        | 117 649         | 10.2            | 10.1–10.2 |
| 2. Stroke (010060)                                                                  | 63 931          | 5.5             | 5.5–5.6   |
| 3. Heart failure (050130)                                                           | 32 993          | 2.8             | 2.8–2.9   |
| 4. Intestinal obstruction without hernia (060210)                                   | 28 701          | 2.5             | 2.5–2.5   |
| 5. Fracture of proximal femur (160800)                                              | 25 905          | 2.2             | 2.2–2.3   |
| 6. Viral enteritis (150010)                                                         | 24 920          | 2.2             | 2.1–2.2   |
| 7. Asthma (040100)                                                                  | 23 858          | 2.1             | 2.0–2.1   |
| 8. Angina pectoris, chronic ischemic heart disease (050050)                         | 20 775          | 1.8             | 1.8–1.8   |
| 9. Disorder associated with shortened gestation period or low birth weight (140010) | 20 540          | 1.8             | 1.8–1.8   |
| 10. Renal infection (110310)                                                        | 19 853          | 1.7             | 1.7–1.7   |
| 41. Drug poisoning (161070a)                                                        | 6 748           | 0.6             | 0.6–0.6   |
| Other causes                                                                        | 769 326         | 66.4            | 66.4–66.5 |
| Comorbid mental illness                                                             | 23 279          | 2.0             | 2.0–2.0   |
| Deep coma                                                                           | 26 792          | 2.3             | 2.3–2.3   |
| Ambulance services                                                                  | 311 333         | 26.9            | 26.8–27.0 |
| Tertiary EMS                                                                        | 54 938          | 4.7             | 4.7–4.8   |
| Surgical procedures                                                                 | 321 974         | 27.8            | 27.7–27.9 |
| Length of stay (days)                                                               |                 |                 |           |
| ≤ 3                                                                                 | 135 096         | 11.7            | 11.6–11.7 |
| 4–7                                                                                 | 266 651         | 23.0            | 23.0–23.1 |
| 8–14                                                                                | 296 549         | 25.6            | 25.5–25.7 |
| 15–30                                                                               | 258 717         | 22.3            | 22.3–22.4 |
| 31–60                                                                               | 136 014         | 11.7            | 11.7–11.8 |
| ≥ 60                                                                                | 64 866          | 5.6             | 5.6–5.6   |
| Death during hospitalization                                                        | 78 226          | 6.8             | 6.7–6.8   |

Comorbidity of mental illness was defined as the following ICD-10 codes as comorbidities: unipolar depressive disorders (F32–F33), bipolar affective disorder (F30–F31), schizophrenia (F20–F29), alcohol use disorders (F10), drug use disorders (F11–F16 and F18–F19), post-traumatic stress disorder (F431), obsessive-compulsive disorder (F42), panic disorder (F400 and F410), or insomnia (F51). Deep coma was defined as a score on the Japan Soma Scale of 100 or more.

EMS, emergency medical services.

**Table 2** Characteristics of poisoning and other causes of admissions

| Rank | Top 10 causes of admissions and drug poisoning (Disease code)                    | ICD-10 codes                                                                                                                                                                                                                                                                                                                                                                                             | N       | %    | Clinical and procedural characteristics, %/median, (rank) |                 |           |           |          |           |           | Mortality |
|------|----------------------------------------------------------------------------------|----------------------------------------------------------------------------------------------------------------------------------------------------------------------------------------------------------------------------------------------------------------------------------------------------------------------------------------------------------------------------------------------------------|---------|------|-----------------------------------------------------------|-----------------|-----------|-----------|----------|-----------|-----------|-----------|
|      |                                                                                  |                                                                                                                                                                                                                                                                                                                                                                                                          |         |      | Age ≥ 65                                                  | Comorbid Mental | Deep Coma | Ambulance | Tertiary | Surgery   | LOS       |           |
| 1    | Pneumonia, acute bronchitis, acute bronchiolitis (040080)                        | A370, A378, A379, A481, B012, B052, B371, B59, J13, J14, J15*, J16*, J17*, J18*, J20*, J21*, J22, J69*                                                                                                                                                                                                                                                                                                   | 117 649 | 10.2 | 48.7 (57)                                                 | 1.5 (53)        | 2.2 (23)  | 19.3 (53) | 2.2 (43) | 5.7 (82)  | 9.0 (62)  | 7.9 (29)  |
| 2    | Stroke (010060)                                                                  | G45*, G46*, I63*, I65*, I66*, I675, I679, I693, I978                                                                                                                                                                                                                                                                                                                                                     | 63 931  | 5.5  | 77.8 (11)                                                 | 1.5 (53)        | 4.0 (14)  | 44.1 (21) | 8.0 (21) | 8.0 (77)  | 17.0 (30) | 5.2 (35)  |
| 3    | Heart failure (050130)                                                           | I50*                                                                                                                                                                                                                                                                                                                                                                                                     | 32 993  | 2.8  | 86.0 (4)                                                  | 1.3 (60)        | 1.6 (26)  | 34.3 (27) | 9.3 (19) | 11.5 (67) | 18.0 (27) | 11.1 (24) |
| 4    | Intestinal obstruction without hernia (060210)                                   | K560, K562, K563, K564, K565, K566, K567, K913                                                                                                                                                                                                                                                                                                                                                           | 28 701  | 2.5  | 64.3 (33)                                                 | 1.9 (40)        | 0.2 (68)  | 18.1 (59) | 2.0 (48) | 19.3 (57) | 11.0 (51) | 2.4 (48)  |
| 5    | Fracture of proximal femur (160800)                                              | M2435, M2445, S7200, S7210, S7220, S7230, S7270, S7280, S7290, S730                                                                                                                                                                                                                                                                                                                                      | 25 905  | 2.2  | 90.6 (1)                                                  | 3.7 (9)         | 0.1 (75)  | 49.5 (14) | 1.5 (58) | 91.0 (5)  | 30.0 (2)  | 1.4 (58)  |
| 6    | Viral enteritis (150010)                                                         | A08*, A09                                                                                                                                                                                                                                                                                                                                                                                                | 24 920  | 2.2  | 23.4 (80)                                                 | 0.9 (73)        | 0.1 (75)  | 14.9 (67) | 0.3 (87) | 0.8 (95)  | 5.0 (89)  | 0.2 (79)  |
| 7    | Asthma (040100)                                                                  | J45*, J46                                                                                                                                                                                                                                                                                                                                                                                                | 23 858  | 2.1  | 12.0 (87)                                                 | 0.8 (76)        | 0.4 (52)  | 9.5 (85)  | 1.2 (64) | 0.5 (97)  | 6.0 (82)  | 0.3 (74)  |
| 8    | Angina pectoris, chronic ischemic heart disease (050050)                         | I20*, I25*                                                                                                                                                                                                                                                                                                                                                                                               | 20 775  | 1.8  | 68.2 (23)                                                 | 0.9 (73)        | 0.4 (52)  | 31.9 (31) | 7.7 (22) | 43.7 (29) | 7.0 (78)  | 0.8 (64)  |
| 9    | Disorder associated with shortened gestation period or low birth weight (140010) | P00*, P01*, P02*, P03*, P04*, P05*, P07*, P08*, P10*, P11*, P12*, P13*, P15*, P20*, P21*, P22*, P23*, P24*, P25*, P26*, P27*, P28*, P29*, P35*, P36*, P37*, P38, P39*, P50*, P51*, P52*, P53, P54*, P55*, P56*, P57*, P58*, P590, P591, P592, P593, P598, P599, P60, P61*, P70*, P71*, P72*, P74*, P75, P76*, P77, P780, P781, P782, P783, P789, P80*, P81*, P83*, P90, P91*, P92*, P93, P94*, P95, P96* | 20 540  | 1.8  | 0.0 (95)                                                  | 0.0 (98)        | 0.4 (52)  | 9.4 (86)  | 0.0 (97) | 10.5 (71) | 8.0 (70)  | 0.5 (69)  |
| 10   | Renal infection (110310)                                                         | N10, N151, N390                                                                                                                                                                                                                                                                                                                                                                                          | 19 853  | 1.7  | 63.7 (34)                                                 | 1.7 (44)        | 1.1 (32)  | 22.5 (47) | 1.3 (63) | 6.7 (80)  | 10.0 (55) | 1.5 (56)  |
| 41   | Drug poisoning (161070a)                                                         | T36*, T37*, T38*, T39*, T40*, T41*, T42*, T43*, T44*, T45*                                                                                                                                                                                                                                                                                                                                               | 6 748   | 0.6  | 13.4 (86)                                                 | 33.7 (1)        | 26.2 (2)  | 74.1 (2)  | 37.8 (1) | 1.7 (91)  | 2.0 (100) | 0.3 (74)  |

Rankings were based on data from the top 100 causes of admissions. Comorbidity of mental illness was defined as the following ICD-10 codes as comorbidities: unipolar depressive disorders (F32–F33), bipolar affective disorder (F30–F31), schizophrenia (F20–F29), alcohol use disorders (F10), drug use disorders (F11–F16 and F18–F19), post-traumatic stress disorder (F431), obsessive-compulsive disorder (F42), panic disorder (F400 and F410), or insomnia (F51). Deep coma was defined as a score on the Japan Soma Scale of 100 or more. Ambulance, ambulance services; LOS, median length of stay; Mortality, in-hospital mortality; Surgery, surgical procedures; Tertiary, tertiary emergency medical services; \*, wild card.



Emergency hospital admissions 1

**Comparison of emergency hospital admissions for drug poisoning and major diseases: a retrospective observational study using a nationwide administrative discharge database**  
**Unique features of drug poisoning among the top 100 causes of emergency hospital admissions: a retrospective observational study using a nationwide administrative discharge database**

Yasuyuki Okumura,<sup>1</sup> Sayuri Shimizu,<sup>2</sup> Koichi B. Ishikawa,<sup>3</sup> Shinya Matsuda,<sup>4</sup> Kiyohide Fushimi,<sup>5</sup> Hiroto Ito<sup>1</sup>

<sup>1</sup> Department of Social Psychiatry, National Institute of Mental Health, National Center of Neurology and Psychiatry, Tokyo 187-8553, Japan

<sup>2</sup> Research Department, Institute for Health Economics and Policy, Tokyo105-0003, Japan

<sup>3</sup> Statistics and Cancer Control Division, National Cancer Center, Tokyo 104-0045, Japan

<sup>4</sup> Department of Preventive Medicine and Community Health, University of Occupational and Environmental Health, Kitakyushu 807-8555, Japan

<sup>5</sup> Department of Health Policy and Informatics, Tokyo Medical and Dental University Graduate School of Medicine, Tokyo 113-8510, Japan

**Correspondence to** Yasuyuki Okumura, Department of Social Psychiatry, National Institute of Mental Health, National Center of Neurology and Psychiatry, 4-1-1 Ogawa-Higashi cho, Kodaira 187-8553, Tokyo, Japan; Tel.: + 81 42 346 2046; Fax: +81 42 346 2047; Email:

Emergency hospital admissions 2

yokumura@ncnp.go.jp

**Key words** Retrospective studies; overdose; emergency medical services; epidemiology

**Word count:** 2224 word

## ABSTRACT

**Objective:** To compare the clinical and procedural characteristics of emergency hospital admissions for the top 100 drug poisoning and major diseases, ~~causes of emergency hospital admissions.~~

**Design:** Retrospective observational study.

**Setting:** Discharged patients from 855 acute care hospitals from 1 July to 31 December in 2008 in Japan.

**Results:** There were a total of 1 157 893 emergency hospital admissions. Among the top 100 causes, drug poisoning was ranked higher in terms of the percentage of patients using ambulatory ambulance services (74.1%; 2nd) and tertiary emergency medical services (37.8%; 1st). Despite higher utilization of emergency care resources, drug poisoning ranked lower in terms of the median length of stay (2 days; 100th), percentage of requirement for surgery surgical procedures (1.7%; 91st), and in-hospital mortality ratio (0.3%; 74th).

**Conclusion:** Drug poisoning is unique among the top 100 causes of emergency admissions. Our findings suggest that drug poisoning imposes a greater burden on emergency care resources but has a less severe clinical course than other causes of admissions. Future research should focus on strategies to reduce the burden of drug poisoning on emergency medical systems.

1  
2  
3  
4  
5  
6  
7  
8  
9  
10  
11  
12  
13  
14  
15  
16  
17  
18  
19  
20  
21  
22  
23  
24  
25  
26  
27  
28  
29  
30  
31  
32  
33  
34  
35  
36  
37  
38  
39  
40  
41  
42  
43  
44  
45  
46  
47  
48  
49  
50  
51  
52  
53  
54  
55  
56  
57  
58  
59  
60

Emergency hospital admissions 3

For peer review only

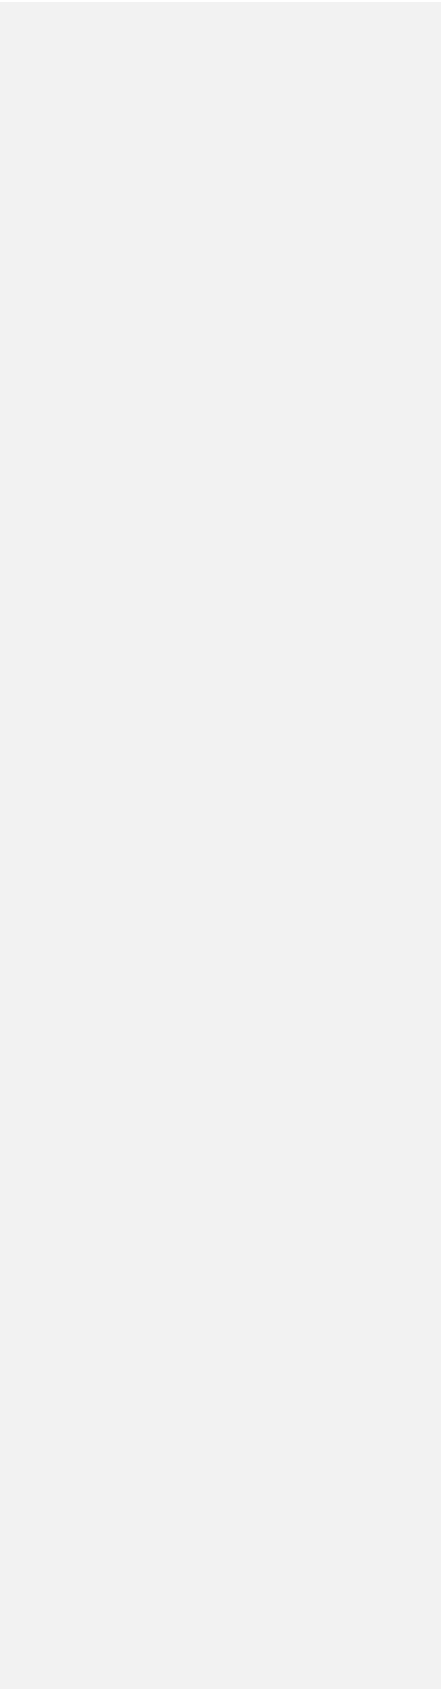

Emergency hospital admissions 4

## Article Summary

### Article focus

■ ~~Only a few multicenter studies have compared resource use and clinical course of emergency hospital admissions. Only a few studies have compared resource use and clinical course among patients in a nationally representative sample.~~ Our aim was to compare the clinical and procedural characteristics of emergency hospital admissions for drug poisoning and major diseases by using a nationwide administrative discharge database. ~~compare the clinical and procedural characteristics of the top 100 causes of emergency hospital admissions using a nationally representative sample of inpatients.~~

### Key messages

■ Drug poisoning is in an anomalous position among the top 100 causes of emergency admissions.

■ Patients with drug poisoning had a less severe clinical course than those with other causes, although they had higher utilization of emergency care resources.

### Strengths and limitations of this study

■ A large data from a nationwide discharge database was studied.

■ Our results are limited to inpatient admissions to acute care hospitals.

Emergency hospital admissions 5

## INTRODUCTION

A better understanding of epidemiology in emergency medical services (EMS) is important for planning EMS resource use and EMS personnel training needs.<sup>1</sup> Drug poisoning is a major cause of admissions to acute care hospitals and places a considerable burden on EMS resources. Drug poisoning accounts for over 15% of all admissions to intensive care units.<sup>2,3</sup> However, most cases of drug poisoning do not result in clinical toxicity. Of patients with drug poisoning admitted to an intensive care unit, 91% do not require advanced treatments.<sup>2</sup> Over 75% of patients admitted to emergency departments can be released from medical observation after a brief period (i.e., 1–2 days).<sup>4-6</sup> Less than 1% of cases result in mortality.<sup>7,8</sup> These previous studies suggest that drug poisoning may impose a needless burden on high-level EMS despite their limited requirements for advanced treatments.<sup>2,9</sup>

Although a number of studies have examined the detailed epidemiology of drug poisoning,<sup>2-8</sup> only a few multicenter studies have compared resource use and clinical course of among emergency hospital admissions patients in a nationally representative sample.<sup>10-12</sup> It remains unknown whether drug poisoning imposes a greater burden on emergency care resources and has a less severe clinical course among major causes of admissions. We thus aimed to compare the clinical and procedural characteristics of emergency hospital admissions for drug poisoning and major diseases the top 100 causes of emergency hospital admissions by using a nationwide administrative discharge database nationally representative sample of inpatients.

Field Code Changed

Emergency hospital admissions 6

## METHODS

### Data source

We conducted an observational study using the nationwide discharge administrative database of the Diagnosis Procedure Combination/Per-Diem Payment System (DPC/PDPS), a Japanese case-mix classification system launched in 2002 by the Ministry of Health, Labour and Welfare of Japan.<sup>13</sup> Every year, the DPC Research Group conducts a survey of DPC/PDPS hospitals. In 2008, 855 of 1 558 DPC/PDPS hospitals voluntarily participated in the survey. The DPC/PDPS database includes clinical and procedural information on *all* inpatients discharged from the participating hospitals between 1 July and 31 December. All the data for each patient were recorded at discharge. The database includes 2.86 million admissions, representing approximately 40% of all inpatient admissions to acute care hospitals in Japan (excluding psychiatric and tuberculosis hospitals).<sup>14</sup> In the present study, we included all emergency hospital admissions and excluded planned admissions to the DPC/PDPS hospitals.

### Setting

In Japan, the EMS system is divided into 3 categories;<sup>15</sup> (1) primary EMS that provides care to patients who can be discharged without hospitalization; (2) secondary EMS that provides care to patients who require admission to a regular inpatient bed; and (3) tertiary EMS that provides care to severely ill and trauma patients who require intensive care. In 2008, there were 18 892 clinics and 963 hospitals for primary EMS, 3 053 hospitals for secondary EMS, and 214 hospitals for tertiary EMS.<sup>14</sup> In the present study, we focused on secondary and tertiary EMS rather than primary EMS, because the DPC/PDPS database is an inpatient database. Among the 855 participating hospitals in the DPC/PDPS database, 130 provide tertiary EMS.

Field Code Changed

Formatted: Font: Italic

Field Code Changed

Field Code Changed

Field Code Changed

1  
2  
3  
4  
5  
6  
7  
8  
9  
10  
11  
12  
13  
14  
15  
16  
17  
18  
19  
20  
21  
22  
23  
24  
25  
26  
27  
28  
29  
30  
31  
32  
33  
34  
35  
36  
37  
38  
39  
40  
41  
42  
43  
44  
45  
46  
47  
48  
49  
50  
51  
52  
53  
54  
55  
56  
57  
58  
59  
60

Emergency hospital admissions 7

For peer review only

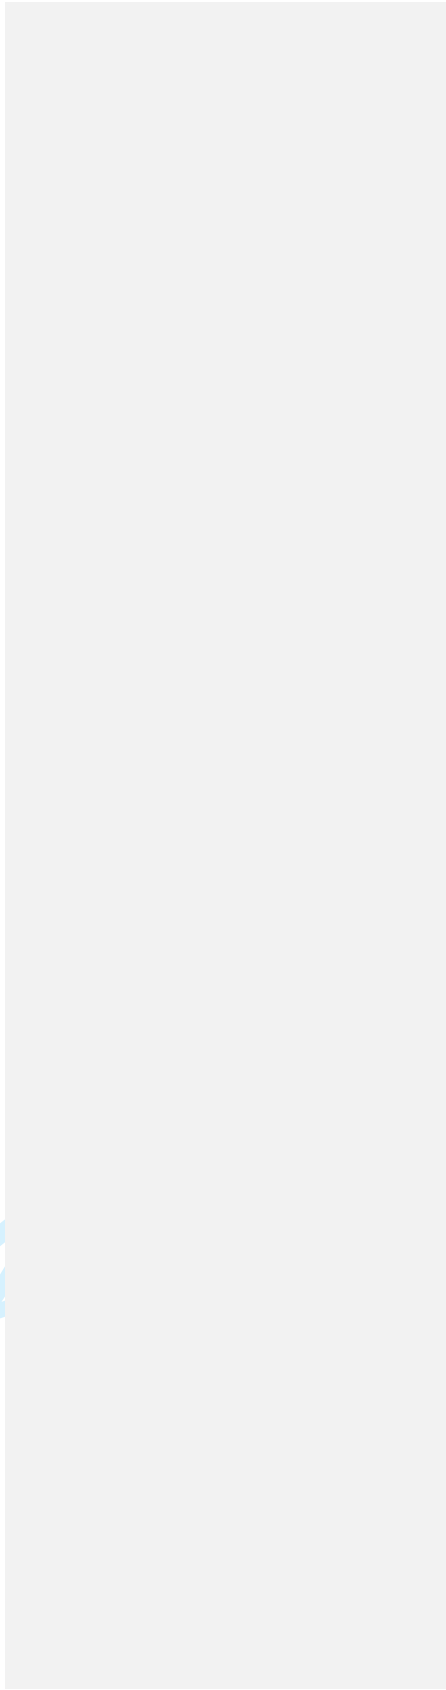

Emergency hospital admissions 8

## Clinical and procedural characteristics

To describe clinical and procedural characteristics of emergency hospital admissions, we used the following study variables: (1) age; (2) gender; (3) major disease categories; (4) comorbidities at admissions; (5) level of consciousness assessed by the Japan Coma Scale (JCS);<sup>16</sup> (6) use of ambulance service; (7) use of tertiary EMS; (8) requirement for ~~surgery~~surgical procedures that include both major surgery and suturing in an emergency department; (9) length of stay (days); and (10) in-hospital mortality.—

Physicians recorded information on diagnoses using the International Classification of Diseases 10th revision (ICD-10) codes. According to the ICD-10 codes, 506 major disease categories were defined in 2008 ([see Supplemental Table](#)). In the database, patients with drug, chemical, and unspecified poisoning (ICD-10 codes T360–T509, T510–T659, and T887, respectively) have the same major disease code (disease code 161070). In the present study, we modified the disease code to separate drug poisoning ([modified disease code 161070a](#)) from chemical and unspecified poisoning ([modified disease code 161070b](#)) according to their ICD-10 codes.

In the database, up to 4 diagnosed comorbidities per patient were recorded. Using the criteria developed by the Global Burden of Disease study with some modifications,<sup>17,17</sup> we defined comorbid status of mental illness as being diagnosed with any of the following ICD-10 codes: unipolar depressive disorders (F32–F33); bipolar affective disorder (F30–F31); schizophrenia (F20–F29); alcohol use disorders (F10); drug use disorders (F11–F16 and F18–F19); post-traumatic stress disorder (F431); obsessive-compulsive disorder (F42); panic disorder (F400 and F410); or insomnia (F51).

Field Code Changed

Field Code Changed



1  
2  
3  
4  
5  
6  
7  
8  
9  
10  
11  
12  
13  
14  
15  
16  
17  
18  
19  
20  
21  
22  
23  
24  
25  
26  
27  
28  
29  
30  
31  
32  
33  
34  
35  
36  
37  
38  
39  
40  
41  
42  
43  
44  
45  
46  
47  
48  
49  
50  
51  
52  
53  
54  
55  
56  
57  
58  
59  
60

Emergency hospital admissions 9

For peer review only

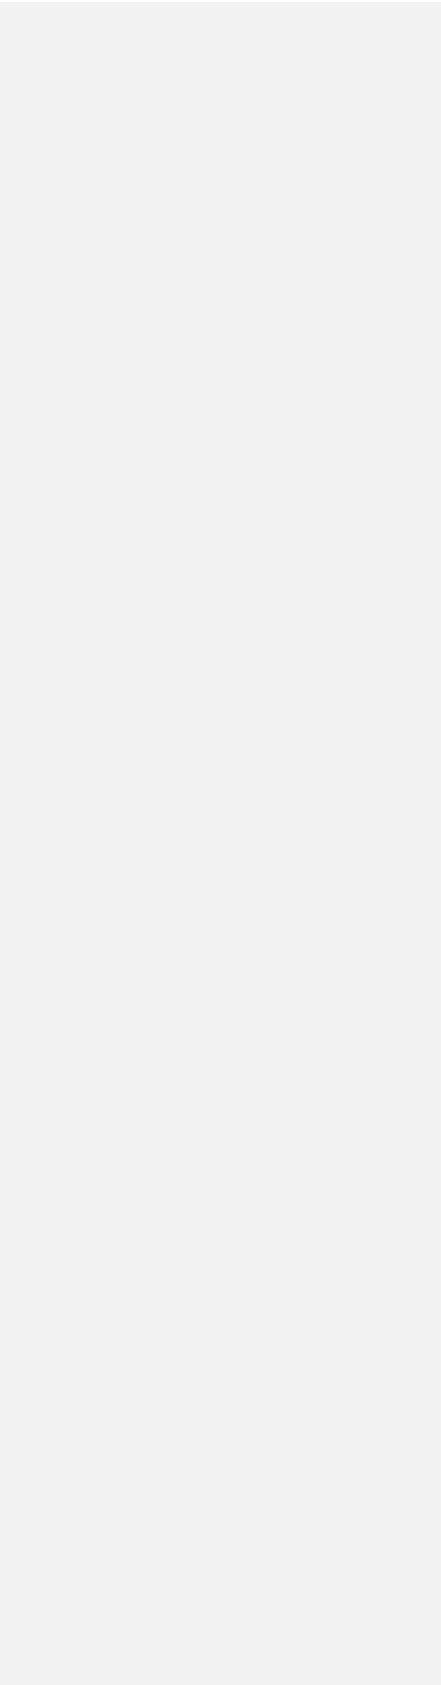

Emergency hospital admissions 10

## Statistical analyses

First, we conducted univariate analyses to summarize the clinical and procedural characteristics of all emergency admissions. Second, we ~~selected patients diagnosed with one of the top 100 major disease codes and calculated compared-summary statistics of 8 variables & variables among by the top disease code~~ ~~100-emergency causes of admissions~~. These variables were as follows: (1) percentage of patients aged 65 years or older; (2) percentage of patients comorbid with mental illness; (3) percentage of patients admitted to hospitals with deep coma (JCS scores  $\geq 100$ , corresponding to scores of  $\leq 7$  on the Glasgow Coma Scale);<sup>16</sup> (4) percentage of patients using ~~ambulatory-ambulance~~ services; (5) percentage of patients using tertiary EMS; (6) percentage of patients requiring ~~surgeriesurgical procedures~~; (7) median length of stay; and (8) percentage of in-hospital mortality. To maximize interpretability, we restricted this analysis to patients with one of the top 100 causes of admissions. We used a predictive principal component analysis (PCA) biplot to reduce the dimensionality of multivariate data (i.e., 100 causes of admissions  $\times$  8 variables) and then to visualize 2 dimensions with minimal loss of information.<sup>18,18-</sup> Before conducting the predictive PCA biplot, we standardized each variable with a mean of 0 and a standard deviation of 1 because the measurement units of 8 variables were incommensurable. In the predictive PCA biplot, the 8 variables were represented by 8 biplot axes to read off predictive values of the variables for each of the top 100 causes. All statistical analyses were performed with R version 2.4.1.<sup>19,19-</sup> The predictive PCA biplot was performed using the BiplotGUI package under R.<sup>19,19-</sup>

Field Code Changed

Field Code Changed

Field Code Changed

Field Code Changed

## RESULTS

### Characteristics of all emergency hospital admissions

During the study period, there were a total of 1-157-893 emergency hospital admissions to 855 hospitals. Characteristics of these admissions are presented in Table 1. The majority (51.7%) of admissions were for patients aged  $\geq 65$  years. Patients aged 0–14 years accounted for less than one-sixth (15.3%) of the admissions. The most prevalent diagnosis was pneumonia, accounting for 10.2% of all admissions, followed by stroke (5.5%) and heart failure (2.8%). Drug poisoning ranked ~~in the top 41~~ 1st among causes of admissions. Less than 5% of patients used tertiary EMS. Of those patients, 88.3% stayed for more than 3 days. About 7% of patients died during hospitalization.

-----  
Insert Table 1 here  
-----

### Comparison of drug poisoning and ~~major diseases~~ other causes of admissions

The top 100 causes of admissions covered 83% (965-749 admissions) of all admissions. Characteristics by cause of admission are shown in Table 2 for the top 10 causes and drug poisoning; the top 100 causes are also shown in Supplemental Table. The predictive PCA biplot with 2 dimensions accounts for 62.9% of the variance in the data from the top 100 causes. The predictive PCA biplot revealed that drug poisoning was in a unique position (Figure 1). Among the top 100 causes, patients with drug poisoning were less likely to be aged  $\geq 65$  years (13.4%; 86th) and most likely to be diagnosed with mental illness (33.7%; 1st). In addition, patients with drug poisoning were more likely to be admitted to hospitals with deep coma (26.2%; 2nd), more

## Emergency hospital admissions 12

likely to use ~~ambulance services~~~~ambulatory services~~ (74.1%; 2nd), and most likely to use tertiary EMS (37.8%; 1st). Despite the higher utilization of emergency care resources, clinical course of drug poisoning was less severe. Among the top 100 causes, patients with drug poisoning had the shortest median length of stay (2 days; 100th), were less likely to require ~~surgery-surgical procedures~~ (1.7%; 91st), and were less likely to die during hospitalization (0.3%; 74th).

In terms of the percentage of patients admitted to tertiary EMS, subarachnoid haemorrhage and ruptured cerebral aneurysm (disease code 010020) ranked second (30.3%; 2nd; see the 46th row in Supplemental Table). Patients with subarachnoid haemorrhage and ruptured cerebral aneurysm were most likely to be admitted to hospitals with deep coma (33.9%; 1st) and most likely to use ambulance services (76.0%; 1st). They had a longer median length of stay (28 days; 4th), were more likely to require surgical procedures (73.2%; 11st), and were more likely to die during hospitalization (26.9%; 9th).

-----  
Insert Table 2 and Figure 1 here  
-----

## DISCUSSION

To our knowledge, this is the first study that used ~~a nationwide administrative discharge database nationally representative sample~~ to compare detailed clinical and procedural characteristics ~~of emergency hospital admissions for drug poisoning and major diseases between drug poisoning and other causes of emergency hospital admissions~~. We found that drug poisoning was unique among the top 100 causes of emergency admissions. Patients with drug poisoning had a less severe clinical course than those with other causes, although they had higher utilization of emergency care resources. Our findings suggest that drug poisoning imposes a higher burden on emergency care resources than other causes of emergency admissions.

Our results are consistent with those of a case-control study conducted in Australia and New Zealand.<sup>10</sup> That study found that the median length of stay in patients with drug poisoning was 3 days, which was much lower than the overall median length of stay (9 days) in patients with 1 of the 8 most common diagnoses in a tertiary intensive care unit. One possible explanation for the potential over-utilization of high-level EMS resources is that staff with significant experience in psychosocial assessment might be more available in high-level EMS facilities. In Japan, 85% of tertiary EMS hospitals have psychiatric departments, while 23% of secondary EMS hospitals are so equipped.<sup>14</sup> Because most patients with drug poisoning have attempted suicide,<sup>20,20</sup> and self-harm patients should receive a specialist psychosocial assessment according to the clinical guideline,<sup>21,21</sup> patients with drug poisoning are transferred to high-level EMS in which mental health specialists are more available.

Another explanation for the potential over-utilization ~~may relate to is that difficulties that confront ambulance officers. First, staff in secondary EMS hospitals might decline to manage patients with drug poisoning. staff in secondary EMS hospitals might decline to manage patients~~

Field Code Changed

Field Code Changed

Field Code Changed

Field Code Changed

Emergency hospital admissions 14

1  
2  
3  
4  
5  
6  
7  
8  
9 ~~with drug poisoning.~~ A survey conducted in Osaka city revealed that ambulance officers  
10 contacted more hospitals to transport patients with drug poisoning than all patients (average  
11 number of contacted hospitals: 7.6 vs. 1.8, respectively).<sup>22,23-</sup> ~~Second, ambulance officers might~~  
12 ~~transport patients with drug poisoning to high-level EMS because of their deep coma. Drug~~  
13 ~~poisoning ranked within the top 2 in terms of the percentage of patients with deep coma and~~  
14 ~~percentage of patients admitted to tertiary EMS. However, patients with drug poisoning had a~~  
15 ~~less severe clinical course than those with other causes. For example, subarachnoid haemorrhage~~  
16 ~~and ruptured cerebral aneurysm had the second highest percentage of patients admitted to tertiary~~  
17 ~~EMS and had a much more severe clinical course than drug poisoning.~~ It would be of great value  
18 to investigate triage tools predicting the need for advanced treatments based on information not  
19 only from early admission factors<sup>23,23-</sup> but also from pre-hospital factors.<sup>24,24-</sup>

Field Code Changed

Field Code Changed

Field Code Changed

20  
21  
22  
23  
24  
25  
26  
27  
28  
29  
30 Our study has several limitations. First, our results cannot be generalized and are limited to  
31 inpatient admissions to acute care hospitals rather than emergency outpatient admissions or  
32 emergency admissions to psychiatric hospitals, because we used the DPC/PDPS database.  
33  
34 Second, we were unable to evaluate variables not included in the DPC/PDPS database. As a  
35 result, we could not assess other potentially important factors predicting the need for advanced  
36 treatments, such as acute physiology and chronic health evaluation (APACHE) scores at  
37 admission<sup>23,23-</sup> or clinical management and course during pre-hospital period.<sup>24,24-</sup> ~~Third, we~~  
38 ~~included all types of drug poisoning (i.e., deliberate, accidental, and undetermined intent) as in a~~  
39 ~~previous study.<sup>7</sup> because data on external causes (ICD-10 codes V01–Y98) are not recorded in~~  
40 ~~the DPC/PDPS database. As a result, we could not distinguish between deliberate and accidental~~  
41 ~~drug poisoning. Fourth-Third,~~ although the database included approximately 40% of all inpatient  
42 admissions in Japan, participation in the survey was voluntary for each hospital and the patient

Field Code Changed

Field Code Changed

Emergency hospital admissions 15

selection procedure was not based on a random sampling technique from all acute hospitals.

In conclusion, we have demonstrated that drug poisoning is unique among the top 100 causes of emergency admissions. Future research should focus on strategies to reduce the burden of drug poisoning on emergency medical systems.

For peer review only

Emergency hospital admissions 16

## Acknowledgements

The authors would like to thank Dr. Toshie Noda for her feedbacks on an earlier draft of this article.

## Funding

Funding for administrating the study was supported by Grants-in-Aid for Research on Policy Planning and Evaluation (Japanese Ministry of Health, Labour and Welfare H22-SEISAKU-SITEI-031 and H24-SEISAKU-SITEI-012). Funding for writing this article was supported by a Health Labour Sciences Research Grant (H22-IYAKU-IPPAN-013) from the Ministry of Health, Labour and Welfare of Japan.

## Competing Interest

None.

## Ethic approval

The study protocol was approved by the institutional review board of the University of Occupational and Environmental Health, Fukuoka, Japan.

## Contributors

SM, KBI, and KF conducted data collection, data synthesis, and data management. KF and HI obtained funding. YO participated in study concept and design, analysis and interpretation of data, drafting of the manuscript, and critical revision of the manuscript. SS supervised data analysis. SS, KBI, KF, and HI participated in interpretation of data and critical revision of the



Emergency hospital admissions 17

manuscript for important intellectual content. All authors contributed to and approved the final manuscript.

### **Provenance and peer review**

Not commissioned; externally peer reviewed.

### **Data sharing information**

No additional data are available.

## References

1. Platts-Mills TF, Leacock B, Cabanas JG, et al. Emergency medical services use by the elderly: analysis of a statewide database. *Prehosp Emerg Care* 2010;**14**:329-33.
2. Schwake L, Wollenschlager I, Stremmel W, et al. Adverse drug reactions and deliberate self-poisoning as cause of admission to the intensive care unit: a 1-year prospective observational cohort study. *Intensive Care Med* 2009;**35**:266-74.
3. McGrath J. A survey of deliberate self-poisoning. *Med J Aust* 1989;**150**:317-8, 320-1, 324.
4. Henderson A, Wright M, Pond SM. Experience with 732 acute overdose patients admitted to an intensive care unit over six years. *Med J Aust* 1993;**158**:28-30.
5. Hendrix L, Verelst S, Desruelles D, et al. Deliberate self-poisoning: characteristics of patients and impact on the emergency department of a large university hospital. *Emerg Med J* 2012.
6. Hollander JE, McCracken G, Johnson S, et al. Emergency department observation of poisoned patients: how long is necessary? *Acad Emerg Med* 1999;**6**:887-94.
7. Heyerdahl F, Bjornaas MA, Dahl R, et al. Repetition of acute poisoning in Oslo: 1-year prospective study. *Br J Psychiatry* 2009;**194**:73-9.
8. Xiang Y, Zhao W, Xiang H, et al. ED visits for drug-related poisoning in the United States, 2007. *Am J Emerg Med* 2011;**30**:293-301.
9. Hamad AE, Al-Ghadban A, Carvounis CP, et al. Predicting the need for medical intensive care monitoring in drug-overdosed patients. *J Intensive Care Med* 2000;**15**:321-328.
10. Flabouris A, Hart GK, George C. Outcomes of patients admitted to tertiary intensive care units after interhospital transfer: comparison with patients admitted from emergency departments. *Crit Care Resusc* 2008;**10**:97-105.

Formatted: Font: Italic, Do not check spelling or grammar

Formatted: Font: Italic, Do not check spelling or grammar

Formatted: Font: Bold, Do not check spelling or grammar

Formatted: Font: Italic, Do not check spelling or grammar

Formatted: Font: Italic, Do not check spelling or grammar

Formatted: Font: Bold, Do not check spelling or grammar

Formatted: Font: Italic, Do not check spelling or grammar

Formatted: Font: Bold, Do not check spelling or grammar

Formatted: Font: Italic, Do not check spelling or grammar

Formatted: Font: Bold, Do not check spelling or grammar

Formatted: Font: Italic, Do not check spelling or grammar

Formatted: Font: Italic, Do not check spelling or grammar

Formatted: Font: Italic, Do not check spelling or grammar

Formatted: Font: Italic, Do not check spelling or grammar

Formatted: Font: Bold, Do not check spelling or grammar

Formatted: Font: Italic, Do not check spelling or grammar

Formatted: Font: Italic, Do not check spelling or grammar

Formatted: Font: Bold, Do not check spelling or grammar

Formatted: Font: Italic, Do not check spelling or grammar

Formatted: Font: Italic, Do not check spelling or grammar

Formatted: Font: Bold, Do not check spelling or grammar

Formatted: Font: Italic, Do not check spelling or grammar

Formatted: Font: Italic, Do not check spelling or grammar

Formatted ... [1]

Formatted ... [2]

Formatted ... [3]

## Emergency hospital admissions 19

11. Spiller HA, Singleton MD. Comparison of incidence of hospital utilization for poisoning and other injury types. *Public Health Rep* 2011;**126**:94-9.
12. Wadman MC, Muelleman RL, Coto JA, *et al*. The pyramid of injury: using ecodes to accurately describe the burden of injury. *Ann Emerg Med* 2003;**42**:468-78.
13. Matsuda S, Ishikawa KB, Kuwabara K, *et al*. Development and use of the Japanese case-mix system. *Eurohealth* 2008;**14**:25-30.
14. Statistics and Information Department, Minister's Secretariat, Ministry of Health, Labour and Welfare. *2008 Summary of Static/Dynamic Surveys of Medical Institutions and Hospital Report (in Japanese)*. Tokyo: Health and Welfare Statistics Association, 2010.
15. Japan International Cooperation Agency. Emergency medical care. *Japan's experiences in public Health and medical systems: towards improving public health and medical systems in developing countries*. Tokyo: Institute for International Cooperation, Japan International Cooperation Agency, 2005:227-244.
16. Takeuchi E. Reliability of grading systems of impaired consciousness. Statistical evaluation of inter-rater reliability and validity of the Japan coma scale (JCS) (in Japanese). *J Osaka Medical College*, 1988:20-30.
17. World Health Organization. *The global burden of disease: 2004 update*: Author, 2004.
18. Gower J, Lubbe S, Roux NL. *Understanding biplots*: Wiley, 2011.
19. R Development Core Team. *R: A language and environment for statistical computing*. Vienna, Austria: R Foundation for Statistical Computing, 2011.
20. Hirata K, Matsumoto Y, Tomioka J, *et al*. Acute drug poisoning at critical care departments in Japan. *Jpn J Hosp Pharm* 1998;**24**:340-348.

Formatted: Font: Italic, Do not check spelling or grammar

Formatted: Font: Bold, Do not check spelling or grammar

Formatted: Font: Italic, Do not check spelling or grammar

Formatted: Font: Italic, Do not check spelling or grammar

Formatted: Font: Bold, Do not check spelling or grammar

Formatted: Font: Italic, Do not check spelling or grammar

Formatted: Font: Italic, Do not check spelling or grammar

Formatted: Font: Bold, Do not check spelling or grammar

Formatted: Font: Italic, Do not check spelling or grammar

Formatted: Font: Italic, Do not check spelling or grammar

Formatted: Font: Italic, Do not check spelling or grammar

Formatted: Font: Italic, Do not check spelling or grammar

Formatted: Font: Italic, Do not check spelling or grammar

Formatted: Font: Italic, Do not check spelling or grammar

Formatted: Font: Italic, Do not check spelling or grammar

Formatted: Font: Italic, Do not check spelling or grammar

Formatted: Font: Bold, Do not check spelling or grammar

## Emergency hospital admissions 20

21. National Institute for Health and Clinical Excellence. *Self-harm: the short-term physical and psychological management and secondary prevention of self-harm in primary and secondary care*. Manchester: Author, 2004.

Formatted: Font: Italic, Do not check spelling or grammar

22. Fire and Disaster Management Agency of the Ministry of Internal Affairs and Communications. *Reports on emergency medicine 2009* Tokyo, 2010.

Formatted: Font: Italic, Do not check spelling or grammar

23. Eizadi Mood N, Sabzghabae AM, Khalili-Dehkordi Z. Applicability of different scoring systems in outcome prediction of patients with mixed drug poisoning-induced coma. *Indian J Anaesth* 2011;**55**:599-604.

Formatted: Font: Italic, Do not check spelling or grammar

Formatted: Font: Bold, Do not check spelling or grammar

24. Gwini SM, Shaw D, Iqbal M, *et al*. Exploratory study of factors associated with adverse clinical features in patients presenting with non-fatal drug overdose/self-poisoning to the ambulance service. *Emerg Med J* 2011;**28**:892-4.

Formatted: Font: Italic, Do not check spelling or grammar

Formatted: Font: Italic, Do not check spelling or grammar

Formatted: Font: Italic, Do not check spelling or grammar

Formatted: Font: Bold, Do not check spelling or grammar

1. Platts-Mills TF, Leacock B, Cabanas JG, *et al*. Emergency medical services use by the elderly: analysis of a statewide database. *Prehosp Emerg Care* 2010;**14**:329-33.

2. Schwake L, Wollenschlager I, Stremmel W, *et al*. Adverse drug reactions and deliberate self poisoning as cause of admission to the intensive care unit: a 1-year prospective observational cohort study. *Intensive Care Med* 2009;**35**:266-74.

3. McGrath J. A survey of deliberate self poisoning. *Med J Aust* 1989;**150**:317-8, 320-1, 324.

4. Henderson A, Wright M, Pond SM. Experience with 732 acute overdose patients admitted to an intensive care unit over six years. *Med J Aust* 1993;**158**:28-30.

5. Hendrix L, Verelst S, Desruelles D, *et al*. Deliberate self poisoning: characteristics of patients and impact on the emergency department of a large university hospital. *Emerg Med J* 2012.

6. Hollander JE, McCracken G, Johnson S, *et al.* Emergency department observation of poisoned patients: how long is necessary? *Acad Emerg Med* 1999;**6**:887-94.
7. Heyerdahl F, Bjornaas MA, Dahl R, *et al.* Repetition of acute poisoning in Oslo: 1-year prospective study. *Br J Psychiatry* 2009;**194**:73-9.
8. Xiang Y, Zhao W, Xiang H, *et al.* ED visits for drug-related poisoning in the United States, 2007. *Am J Emerg Med* 2011;**30**:293-301.
9. Hamad AE, Al-Ghadban A, Carvounis CP, *et al.* Predicting the need for medical intensive care monitoring in drug-overdosed patients. *J Intensive Care Med* 2000;**15**:321-328.
10. Flabouris A, Hart GK, George C. Outcomes of patients admitted to tertiary intensive care units after interhospital transfer: comparison with patients admitted from emergency departments. *Crit Care Resusc* 2008;**10**:97-105.
11. Spiller HA, Singleton MD. Comparison of incidence of hospital utilization for poisoning and other injury types. *Public Health Rep* 2011;**126**:94-9.
12. Wadman MC, Muelleman RL, Coto JA, *et al.* The pyramid of injury: using ecodes to accurately describe the burden of injury. *Ann Emerg Med* 2003;**42**:468-78.
13. Matsuda S, Ishikawa KB, Kuwabara K, *et al.* Development and use of the Japanese case-mix system. *Eurohealth* 2008;**14**:25-30.
14. Statistics and Information Department, Minister's Secretariat, Ministry of Health, Labour and Welfare. *2008 Summary of Static/Dynamic Surveys of Medical Institutions and Hospital Report (in Japanese)*. Tokyo: Health and Welfare Statistics Association, 2010.
15. Japan International Cooperation Agency. Emergency medical care. *Japan's experiences in public health and medical systems: towards improving public health and medical systems in*

- developing countries*. Tokyo: Institute for International Cooperation, Japan International Cooperation Agency, 2005:227-244.
16. Takeuchi E. Reliability of grading systems of impaired consciousness. Statistical evaluation of inter-rater reliability and validity of the Japan coma scale (JCS) (in Japanese). *J Osaka Medical College*, 1988:20-30.
17. World Health Organization. *The global burden of disease: 2004 update*. Author, 2004.
18. Gower J, Lubbe S, Roux NL. *Understanding biplots*. Wiley, 2011.
19. R Development Core Team. *R: A language and environment for statistical computing*. Vienna, Austria: R Foundation for Statistical Computing, 2011.
20. Hirata K, Matsumoto Y, Tomioka J, *et al*. Acute drug poisoning at critical care departments in Japan. *Jpn J Hosp Pharm* 1998;**24**:340-348.
21. National Institute for Health and Clinical Excellence. *Self harm: the short term physical and psychological management and secondary prevention of self harm in primary and secondary care*. Manchester: Author, 2004.
22. Fire and Disaster Management Agency of the Ministry of Internal Affairs and Communications. *Reports on emergency medicine 2009* Tokyo, 2010.
23. Eizadi Mood N, Sabzghabae AM, Khalili-Dehkordi Z. Applicability of different scoring systems in outcome prediction of patients with mixed drug poisoning-induced coma. *Indian J Anaesth* 2011;**55**:599-604.
24. Gwini SM, Shaw D, Iqbal M, *et al*. Exploratory study of factors associated with adverse clinical features in patients presenting with non-fatal drug overdose/self poisoning to the ambulance service. *Emerg Med J* 2011;**28**:892-4.

## Emergency hospital admissions 23

**Table 1** Characteristics of emergency hospital admissions

| Characteristic                                                                      | N of admissions | % of admissions | 95% CI    |
|-------------------------------------------------------------------------------------|-----------------|-----------------|-----------|
| Age                                                                                 |                 |                 |           |
| 0–14                                                                                | 177 092         | 15.3            | 15.2–15.4 |
| 15–64                                                                               | 382 025         | 33.0            | 32.9–33.1 |
| ≥ 65                                                                                | 598 776         | 51.7            | 51.6–51.8 |
| Gender women                                                                        | 547 280         | 47.3            | 47.2–47.3 |
| Top 10 causes of admissions and drug poisoning (Disease code)                       |                 |                 |           |
| 1. Pneumonia, acute bronchitis, acute bronchiolitis (040080)                        | 117 649         | 10.2            | 10.1–10.2 |
| 2. Stroke (010060)                                                                  | 63 931          | 5.5             | 5.5–5.6   |
| 3. Heart failure (050130)                                                           | 32 993          | 2.8             | 2.8–2.9   |
| 4. Intestinal obstruction without hernia (060210)                                   | 28 701          | 2.5             | 2.5–2.5   |
| 5. Fracture of proximal femur (160800)                                              | 25 905          | 2.2             | 2.2–2.3   |
| 6. Viral enteritis (150010)                                                         | 24 920          | 2.2             | 2.1–2.2   |
| 7. Asthma (040100)                                                                  | 23 858          | 2.1             | 2.0–2.1   |
| 8. Angina pectoris, chronic ischemic heart disease (050050)                         | 20 775          | 1.8             | 1.8–1.8   |
| 9. Disorder associated with shortened gestation period or low birth weight (140010) | 20 540          | 1.8             | 1.8–1.8   |
| 10. Renal infection (110310)                                                        | 19 853          | 1.7             | 1.7–1.7   |
| 41. Drug poisoning (161070a)                                                        | 6 748           | 0.6             | 0.6–0.6   |
| Other causes                                                                        | 769 326         | 66.4            | 66.4–66.5 |
| Comorbid mental illness                                                             | 23 279          | 2.0             | 2.0–2.0   |
| Deep coma                                                                           | 26 792          | 2.3             | 2.3–2.3   |
| Ambulance services                                                                  | 311 333         | 26.9            | 26.8–27.0 |
| Tertiary EMS                                                                        | 54 938          | 4.7             | 4.7–4.8   |
| <b>Surgery/Surgical procedures</b>                                                  | 321_974         | 27.8            | 27.7–27.9 |
| Length of stay (days)                                                               |                 |                 |           |
| ≤ 3                                                                                 | 135 096         | 11.7            | 11.6–11.7 |
| 4–7                                                                                 | 266 651         | 23.0            | 23.0–23.1 |
| 8–14                                                                                | 296 549         | 25.6            | 25.5–25.7 |
| 15–30                                                                               | 258 717         | 22.3            | 22.3–22.4 |
| 31–60                                                                               | 136 014         | 11.7            | 11.7–11.8 |
| ≥ 60                                                                                | 64 866          | 5.6             | 5.6–5.6   |
| Death during hospitalization                                                        | 78 226          | 6.8             | 6.7–6.8   |

Comorbidity of mental illness was defined as the following ICD-10 codes as comorbidities: unipolar depressive disorders (F32–F33), bipolar affective disorder (F30–F31), schizophrenia (F20–F29), alcohol use disorders (F10), drug use disorders (F11–F16 and F18–F19), post-traumatic stress disorder (F431), obsessive-compulsive disorder (F42), panic disorder (F400 and F410), or insomnia (F51). Deep coma was defined as a score on the Japan Soma Scale of 100 or more. EMS, emergency medical services.

## Emergency hospital admissions 24

**Table 2** Characteristics of poisoning and other causes of admissions

| Rank | Top 10 causes of admissions and drug poisoning (Disease code)                    | ICD-10 codes                                                                                                                                                                                                                                                                                                                                                                                             | N       | %    | Clinical and procedural characteristics, %/median, (rank) |                 |           |           |                  |           |           |           |
|------|----------------------------------------------------------------------------------|----------------------------------------------------------------------------------------------------------------------------------------------------------------------------------------------------------------------------------------------------------------------------------------------------------------------------------------------------------------------------------------------------------|---------|------|-----------------------------------------------------------|-----------------|-----------|-----------|------------------|-----------|-----------|-----------|
|      |                                                                                  |                                                                                                                                                                                                                                                                                                                                                                                                          |         |      | Age ≥ 65                                                  | Comorbid Mental | Deep Coma | Ambulance | Tertiary Surgery | LOS       | Mortality |           |
| 1    | Pneumonia, acute bronchitis, acute bronchiolitis (040080)                        | A370, A378, A379, A481, B012, B052, B371, B59, J13, J14, J15*, J16*, J17*, J18*, J20*, J21*, J22, J69*                                                                                                                                                                                                                                                                                                   | 117 649 | 10.2 | 48.7 (57)                                                 | 1.5 (53)        | 2.2 (23)  | 19.3 (53) | 2.2 (43)         | 5.7 (82)  | 9.0 (62)  | 7.9 (29)  |
| 2    | Stroke (010060)                                                                  | G45*, G46*, I63*, I65*, I66*, I675, I679, I693, I978                                                                                                                                                                                                                                                                                                                                                     | 63 931  | 5.5  | 77.8 (11)                                                 | 1.5 (53)        | 4.0 (14)  | 44.1 (21) | 8.0 (21)         | 8.0 (77)  | 17.0 (30) | 5.2 (35)  |
| 3    | Heart failure (050130)                                                           | I50*                                                                                                                                                                                                                                                                                                                                                                                                     | 32 993  | 2.8  | 86.0 (4)                                                  | 1.3 (60)        | 1.6 (26)  | 34.3 (27) | 9.3 (19)         | 11.5 (67) | 18.0 (27) | 11.1 (24) |
| 4    | Intestinal obstruction without hernia (060210)                                   | K560, K562, K563, K564, K565, K566, K567, K913                                                                                                                                                                                                                                                                                                                                                           | 28 701  | 2.5  | 64.3 (33)                                                 | 1.9 (40)        | 0.2 (68)  | 18.1 (59) | 2.0 (48)         | 19.3 (57) | 11.0 (51) | 2.4 (48)  |
| 5    | Fracture of proximal femur (160800)                                              | M2435, M2445, S7200, S7210, S7220, S7230, S7270, S7280, S7290, S730                                                                                                                                                                                                                                                                                                                                      | 25 905  | 2.2  | 90.6 (1)                                                  | 3.7 (9)         | 0.1 (75)  | 49.5 (14) | 1.5 (58)         | 91.0 (5)  | 30.0 (2)  | 1.4 (58)  |
| 6    | Viral enteritis (150010)                                                         | A08*, A09                                                                                                                                                                                                                                                                                                                                                                                                | 24 920  | 2.2  | 23.4 (80)                                                 | 0.9 (73)        | 0.1 (75)  | 14.9 (67) | 0.3 (87)         | 0.8 (95)  | 5.0 (89)  | 0.2 (79)  |
| 7    | Asthma (040100)                                                                  | J45*, J46                                                                                                                                                                                                                                                                                                                                                                                                | 23 858  | 2.1  | 12.0 (87)                                                 | 0.8 (76)        | 0.4 (52)  | 9.5 (85)  | 1.2 (64)         | 0.5 (97)  | 6.0 (82)  | 0.3 (74)  |
| 8    | Angina pectoris, chronic ischemic heart disease (050050)                         | I20*, I25*                                                                                                                                                                                                                                                                                                                                                                                               | 20 775  | 1.8  | 68.2 (23)                                                 | 0.9 (73)        | 0.4 (52)  | 31.9 (31) | 7.7 (22)         | 43.7 (29) | 7.0 (78)  | 0.8 (64)  |
| 9    | Disorder associated with shortened gestation period or low birth weight (140010) | P00*, P01*, P02*, P03*, P04*, P05*, P07*, P08*, P10*, P11*, P12*, P13*, P15*, P20*, P21*, P22*, P23*, P24*, P25*, P26*, P27*, P28*, P29*, P35*, P36*, P37*, P38, P39*, P50*, P51*, P52*, P53, P54*, P55*, P56*, P57*, P58*, P590, P591, P592, P593, P598, P599, P60, P61*, P70*, P71*, P72*, P74*, P75, P76*, P77, P780, P781, P782, P783, P789, P80*, P81*, P83*, P90, P91*, P92*, P93, P94*, P95, P96* | 20 540  | 1.8  | 0.0 (95)                                                  | 0.0 (98)        | 0.4 (52)  | 9.4 (86)  | 0.0 (97)         | 10.5 (71) | 8.0 (70)  | 0.5 (69)  |
| 10   | Renal infection (110310)                                                         | N10, N151, N390                                                                                                                                                                                                                                                                                                                                                                                          | 19 853  | 1.7  | 63.7 (34)                                                 | 1.7 (44)        | 1.1 (32)  | 22.5 (47) | 1.3 (63)         | 6.7 (80)  | 10.0 (55) | 1.5 (56)  |
| 41   | Drug poisoning* (161070a)                                                        | T36*, T37*, T38*, T39*, T40*, T41*, T42*, T43*, T44*, T45*                                                                                                                                                                                                                                                                                                                                               | 6 748   | 0.6  | 13.4 (86)                                                 | 33.7 (1)        | 26.2 (2)  | 74.1 (2)  | 37.8 (1)         | 1.7 (91)  | 2.0 (100) | 0.3 (74)  |

Rankings were based on data from the top 100 causes of admissions. Comorbidity of mental illness was defined as the following ICD-10 codes as comorbidities: unipolar depressive disorders (F32–F33), bipolar affective disorder (F30–F31), schizophrenia (F20–F29), alcohol use disorders (F10), drug use disorders (F11–F16 and F18–F19), post-traumatic stress disorder (F431), obsessive-compulsive disorder (F42), panic disorder (F400 and F410), or insomnia (F51). Deep coma was defined as a score on the Japan Soma Scale of 100 or more. Ambulance, ambulance services; LOS, median length of stay; Mortality, in-hospital mortality; [Surgerv. surgical procedures](#); Tertiary, tertiary emergency medical services; \*, wild card.



1  
2  
3  
4  
5  
6  
7  
8  
9  
10  
11  
12  
13  
14  
15  
16  
17  
18  
19  
20  
21  
22  
23  
24  
25  
26  
27  
28  
29  
30  
31  
32  
33  
34  
35  
36  
37  
38  
39  
40  
41  
42  
43  
44  
45  
46  
47  
48  
49  
50  
51  
52  
53  
54  
55  
56  
57  
58  
59  
60

For peer review only

1  
2  
3  
4  
5  
6  
7  
8  
9  
10  
11  
12  
13  
14  
15  
16  
17  
18  
19  
20  
21  
22  
23  
24  
25  
26  
27  
28  
29  
30  
31  
32  
33  
34  
35  
36  
37  
38  
39  
40  
41  
42  
43  
44  
45  
46  
47  
48  
49  
50  
51  
52  
53  
54  
55  
56  
57  
58  
59  
60



The predictive principal component biplot on data from the characteristics of the top 100 causes. Each dot represents one of the causes. Eight axes are positioned and calibrated so that the orthogonal projection of a dot onto an axis 'predicts' as best as is graphically possible the value of the corresponding disease on the corresponding variable. Ambulance, ambulance services; LOS, median length of stay; Mortality, in-hospital mortality; Surgery, surgical procedures; Tertiary, tertiary emergency medical services.  
177x177mm (300 x 300 DPI)

## Supplemental Table

| Rank | Clinical diagnosis (Disease code)                                                                   | ICD-10 codes                                                                                                                                                                                                                                                                                                                                                                                             | N       | %    | Clinical and procedural characteristics, %/median, (rank) |                 |           |           |          |           |           |           |
|------|-----------------------------------------------------------------------------------------------------|----------------------------------------------------------------------------------------------------------------------------------------------------------------------------------------------------------------------------------------------------------------------------------------------------------------------------------------------------------------------------------------------------------|---------|------|-----------------------------------------------------------|-----------------|-----------|-----------|----------|-----------|-----------|-----------|
|      |                                                                                                     |                                                                                                                                                                                                                                                                                                                                                                                                          |         |      | Age ≥ 65                                                  | Comorbid Mental | Deep Coma | Ambulance | Tertiary | Surgery   | LOS       | Mortality |
| 1    | Pneumonia, acute bronchitis, acute bronchiolitis (040080)                                           | A370, A378, A379, A481, B012, B052, B371, B59, J13, J14, J15*, J16*, J17*, J18*, J20*, J21*, J22, J69*                                                                                                                                                                                                                                                                                                   | 117 649 | 10.2 | 48.7 (57)                                                 | 1.5 (53)        | 2.2 (23)  | 19.3 (53) | 2.2 (43) | 5.7 (82)  | 9.0 (62)  | 7.9 (29)  |
| 2    | Stroke (010060)                                                                                     | G45*, G46*, I63*, I65*, I66*, I675, I679, I693, I978                                                                                                                                                                                                                                                                                                                                                     | 63 931  | 5.5  | 77.8 (11)                                                 | 1.5 (53)        | 4.0 (14)  | 44.1 (21) | 8.0 (21) | 8.0 (77)  | 17.0 (30) | 5.2 (35)  |
| 3    | Heart failure (050130)                                                                              | I50*                                                                                                                                                                                                                                                                                                                                                                                                     | 32 993  | 2.8  | 86.0 (4)                                                  | 1.3 (60)        | 1.6 (26)  | 34.3 (27) | 9.3 (19) | 11.5 (67) | 18.0 (27) | 11.1 (24) |
| 4    | Intestinal obstruction without hernia (060210)                                                      | K560, K562, K563, K564, K565, K566, K567, K913                                                                                                                                                                                                                                                                                                                                                           | 28 701  | 2.5  | 64.3 (33)                                                 | 1.9 (40)        | 0.2 (68)  | 18.1 (59) | 2.0 (48) | 19.3 (57) | 11.0 (51) | 2.4 (48)  |
| 5    | Fracture of proximal femur (160800)                                                                 | M2435, M2445, S7200, S7210, S7220, S7230, S7270, S7280, S7290, S730                                                                                                                                                                                                                                                                                                                                      | 25 905  | 2.2  | 90.6 (1)                                                  | 3.7 (9)         | 0.1 (75)  | 49.5 (14) | 1.5 (58) | 91.0 (5)  | 30.0 (2)  | 1.4 (58)  |
| 6    | Viral enteritis (150010)                                                                            | A08*, A09                                                                                                                                                                                                                                                                                                                                                                                                | 24 920  | 2.2  | 23.4 (80)                                                 | 0.9 (73)        | 0.1 (75)  | 14.9 (67) | 0.3 (87) | 0.8 (95)  | 5.0 (89)  | 0.2 (79)  |
| 7    | Asthma (040100)                                                                                     | J45*, J46                                                                                                                                                                                                                                                                                                                                                                                                | 23 858  | 2.1  | 12.0 (87)                                                 | 0.8 (76)        | 0.4 (52)  | 9.5 (85)  | 1.2 (64) | 0.5 (97)  | 6.0 (82)  | 0.3 (74)  |
| 8    | Angina pectoris, chronic ischemic heart disease (050050)                                            | I20*, I25*                                                                                                                                                                                                                                                                                                                                                                                               | 20 775  | 1.8  | 68.2 (23)                                                 | 0.9 (73)        | 0.4 (52)  | 31.9 (31) | 7.7 (22) | 43.7 (29) | 7.0 (78)  | 0.8 (64)  |
| 9    | Disorder associated with shortened gestation period or low birth weight (140010)                    | P00*, P01*, P02*, P03*, P04*, P05*, P07*, P08*, P10*, P11*, P12*, P13*, P15*, P20*, P21*, P22*, P23*, P24*, P25*, P26*, P27*, P28*, P29*, P35*, P36*, P37*, P38, P39*, P50*, P51*, P52*, P53, P54*, P55*, P56*, P57*, P58*, P590, P591, P592, P593, P598, P599, P60, P61*, P70*, P71*, P72*, P74*, P75, P76*, P77, P780, P781, P782, P783, P789, P80*, P81*, P83*, P90, P91*, P92*, P93, P94*, P95, P96* | 20 540  | 1.8  | 0.0 (95)                                                  | 0.0 (98)        | 0.4 (52)  | 9.4 (86)  | 0.0 (97) | 10.5 (71) | 8.0 (70)  | 0.5 (69)  |
| 10   | Renal infection (110310)                                                                            | N10, N151, N390                                                                                                                                                                                                                                                                                                                                                                                          | 19 853  | 1.7  | 63.7 (34)                                                 | 1.7 (44)        | 1.1 (32)  | 22.5 (47) | 1.3 (63) | 6.7 (80)  | 10.0 (55) | 1.5 (56)  |
| 11   | Gastroduodenal ulcer, gastric diverticulum, pyloric stenosis (060140)                               | K25*, K26*, K311, K312, K314                                                                                                                                                                                                                                                                                                                                                                             | 19 387  | 1.7  | 53.5 (52)                                                 | 1.6 (47)        | 0.4 (52)  | 37.2 (25) | 6.6 (26) | 62.1 (17) | 11.0 (51) | 1.8 (55)  |
| 12   | Chronic nephritic syndrome/chronic interstitial nephritis/chronic renal failure (110280)            | I120, I129, N02*, N03*, N05*, N06*, N07*, N08*, N11*, N12, N14*, N18*, N391, N392                                                                                                                                                                                                                                                                                                                        | 19 295  | 1.7  | 67.3 (27)                                                 | 1.4 (58)        | 1.0 (33)  | 18.7 (55) | 3.0 (37) | 31.2 (43) | 16.0 (34) | 6.8 (33)  |
| 13   | Appendicitis (060150)                                                                               | K35*, K36, K37, K38*                                                                                                                                                                                                                                                                                                                                                                                     | 18 566  | 1.6  | 11.9 (88)                                                 | 0.8 (76)        | 0.0 (82)  | 9.1 (88)  | 1.5 (58) | 75.4 (10) | 6.0 (82)  | 0.0 (85)  |
| 14   | Bile duct (intra/extra hepatic) lithiasis (060340)                                                  | K803, K804, K805, K830, K831, K832, K833, K834, K838, K839, K915                                                                                                                                                                                                                                                                                                                                         | 17 869  | 1.5  | 75.6 (13)                                                 | 1.1 (68)        | 0.3 (60)  | 16.9 (64) | 2.3 (42) | 68.3 (14) | 14.0 (44) | 2.9 (43)  |
| 15   | Inflammation of oesophagus, stomach, duodenum and other intestines (other benign diseases) (060130) | B054, I880, K20, K21*, K220, K221, K222, K223, K224, K225, K226, K228, K229, K23*, K27*, K28*, K29*, K30, K310, K313, K315, K316, K318, K52*, K58*, K627, K633, K634, K638, K639, K90*, K910, K911, K912, K914, K92*, K93*                                                                                                                                                                               | 17 715  | 1.5  | 60.8 (47)                                                 | 2.3 (28)        | 0.5 (50)  | 25.9 (42) | 4.0 (33) | 31.8 (42) | 9.0 (62)  | 2.3 (49)  |
| 16   | Skull and intracranial injury (160100)                                                              | S000, S007, S008, S009, S010, S017, S018, S019, S020*, S021*, S06*, S071, S079, S080, S089, S090, S091, S097                                                                                                                                                                                                                                                                                             | 17 372  | 1.5  | 57.9 (49)                                                 | 2.6 (22)        | 8.1 (9)   | 63.9 (6)  | 18.0 (8) | 44.4 (28) | 8.0 (70)  | 5.8 (34)  |
| 17   | Nontraumatic intracranial haematoma (excluding nontraumatic subdural haematoma) (010040)            | I61*, I629, I680, Q280, Q281, Q282, Q283                                                                                                                                                                                                                                                                                                                                                                 | 16 389  | 1.4  | 62.2 (42)                                                 | 1.1 (68)        | 19.6 (3)  | 70.0 (3)  | 21.8 (3) | 22.3 (55) | 23.0 (11) | 15.6 (21) |

Supplemental Table

| Rank | Clinical diagnosis (Disease code)                                                                                        | ICD-10 codes                                                                                                                             | N      | %   | Clinical and procedural characteristics, %/median, (rank) |                 |           |           |           |           |           |           |
|------|--------------------------------------------------------------------------------------------------------------------------|------------------------------------------------------------------------------------------------------------------------------------------|--------|-----|-----------------------------------------------------------|-----------------|-----------|-----------|-----------|-----------|-----------|-----------|
|      |                                                                                                                          |                                                                                                                                          |        |     | Age ≥ 65                                                  | Comorbid Mental | Deep Coma | Ambulance | Tertiary  | Surgery   | LOS       | Mortality |
| 18   | Acute myocardial infarction, recurrent myocardial infarction (050030)                                                    | I21*, I22*, I24*                                                                                                                         | 15 812 | 1.4 | 63.6 (35)                                                 | 0.8 (76)        | 3.0 (19)  | 56.5 (8)  | 21.5 (4)  | 85.2 (6)  | 15.0 (38) | 7.9 (29)  |
| 19   | Benign disease of small and large intestine (including benign tumour) (060100)                                           | D12*, D133, D191, D197, D199, D201, D372, D373, D374, D375, K57*, K620, K621, K635                                                       | 13 657 | 1.2 | 43.6 (64)                                                 | 0.7 (82)        | 0.0 (82)  | 7.9 (90)  | 1.1 (65)  | 45.9 (27) | 7.0 (78)  | 0.3 (74)  |
| 20   | Malignant pulmonary tumour (040040)                                                                                      | C33, C34*, C780, D021, D022, D024                                                                                                        | 13 327 | 1.2 | 75.3 (14)                                                 | 2.3 (28)        | 0.8 (38)  | 19.5 (52) | 1.4 (60)  | 10.9 (69) | 21.0 (20) | 40.5 (4)  |
| 21   | Epilepsy (010230)                                                                                                        | G40*, G41*                                                                                                                               | 12 668 | 1.1 | 34.6 (70)                                                 | 3.3 (12)        | 12.7 (5)  | 68.6 (4)  | 10.4 (15) | 2.3 (88)  | 5.0 (89)  | 0.9 (62)  |
| 22   | Vestibular dysfunction (030400)                                                                                          | H810, H811, H812, H813, H818, H819                                                                                                       | 12 589 | 1.1 | 56.8 (51)                                                 | 1.2 (66)        | 0.0 (82)  | 48.3 (15) | 0.4 (86)  | 0.3 (99)  | 5.0 (89)  | 0.0 (85)  |
| 23   | Hydrops of gallbladder, cholecystitis (060335)                                                                           | D135, K800, K801, K81*, K820, K821, K822, K823, K824, K828, K829, K835, K870                                                             | 11 924 | 1.0 | 63.2 (39)                                                 | 1.5 (53)        | 0.3 (60)  | 18.2 (58) | 2.2 (43)  | 55.5 (22) | 15.0 (38) | 1.5 (56)  |
| 24   | Malignant gastric tumour (060020)                                                                                        | C16*, D002                                                                                                                               | 11 210 | 1.0 | 73.7 (16)                                                 | 1.6 (47)        | 0.4 (52)  | 15.4 (66) | 1.1 (65)  | 43.4 (30) | 23.0 (11) | 29.2 (7)  |
| 25   | Blood poisoning (180010)                                                                                                 | A021, A327, A391, A392, A393, A394, A395, A398, A399, A40*, A41*, B007, B250, B252, B376, B377, B387, B393, B407, B417, B427, B447, B464 | 10 923 | 0.9 | 67.4 (26)                                                 | 2.1 (31)        | 6.2 (11)  | 40.8 (23) | 12.1 (12) | 29.7 (46) | 17.0 (30) | 25.9 (10) |
| 26   | Acute pyoderma (080011)                                                                                                  | A46, L00, L01*, L020, L021, L022, L024, L028, L029, L03*, L08*                                                                           | 10 547 | 0.9 | 49.7 (55)                                                 | 1.1 (68)        | 0.2 (68)  | 9.3 (87)  | 0.7 (75)  | 13.5 (63) | 10.0 (55) | 0.5 (69)  |
| 27   | Upper respiratory tract inflammation (030270)                                                                            | B302, J00, J02*, J06*, J31*                                                                                                              | 10 124 | 0.9 | 6.4 (90)                                                  | 0.3 (93)        | 0.2 (68)  | 7.9 (90)  | 0.1 (91)  | 0.3 (99)  | 5.0 (89)  | 0.0 (85)  |
| 28   | Impairment from fracture of thoracic or lumbar vertebra or lower (including thoracic/lumbar spinal cord injury) (160690) | S220*, S221*, S230, S231, S232, S233, S240, S241, S242, S245, S320*, S330, S331, S340, S341, S342, S343, S344, S345, T08*                | 9 547  | 0.8 | 82.9 (8)                                                  | 2.7 (19)        | 0.1 (75)  | 45.3 (19) | 2.4 (39)  | 8.2 (76)  | 26.0 (6)  | 0.3 (74)  |
| 29   | Cirrhosis (including biliary cirrhosis) (060300)                                                                         | I81, I820, I850, I859, I864, I982, K717, K721, K729, K740, K741, K742, K743, K744, K745, K746, K765, K766                                | 9 189  | 0.8 | 61.7 (44)                                                 | 2.7 (19)        | 3.3 (17)  | 33.4 (28) | 6.2 (27)  | 39.5 (33) | 17.0 (30) | 19.4 (17) |
| 30   | Malignant tumour of liver/intrahepatic bile duct (including secondary tumour) (060050)                                   | C22*, C787, D015, D376                                                                                                                   | 8 854  | 0.8 | 74.5 (15)                                                 | 1.5 (53)        | 1.0 (33)  | 18.0 (60) | 1.6 (55)  | 31.2 (43) | 17.0 (30) | 42.9 (3)  |
| 31   | Acute tonsillitis, acute laryngopharyngitis (040060)                                                                     | A691, J03*, J04*, J05*, J390, J391, J392, J393, J399                                                                                     | 8 795  | 0.8 | 6.3 (91)                                                  | 0.5 (87)        | 0.1 (75)  | 5.6 (93)  | 0.5 (80)  | 2.7 (87)  | 5.0 (89)  | 0.1 (82)  |
| 32   | Pneumothorax (040200)                                                                                                    | J93*                                                                                                                                     | 8 764  | 0.8 | 27.4 (77)                                                 | 0.6 (85)        | 0.3 (60)  | 14.6 (68) | 2.2 (43)  | 37.3 (37) | 9.0 (62)  | 1.3 (59)  |
| 33   | Malignant tumour of colon (ascending to sigmoid colon) (060035)                                                          | C18*, C260, C269, C775, C785, D010                                                                                                       | 8 409  | 0.7 | 71.6 (19)                                                 | 1.5 (53)        | 0.3 (60)  | 12.7 (77) | 1.4 (60)  | 62.2 (16) | 24.0 (9)  | 17.2 (18) |
| 34   | Dehydration (100380)                                                                                                     | E86                                                                                                                                      | 8 380  | 0.7 | 61.5 (45)                                                 | 3.2 (13)        | 1.5 (29)  | 30.2 (35) | 1.6 (55)  | 2.1 (89)  | 6.0 (82)  | 2.6 (47)  |
| 35   | Tachyarrhythmia (050070)                                                                                                 | I456, I47*, I48, I490, I491, I492, I493, I494, I498                                                                                      | 7 779  | 0.7 | 65.5 (30)                                                 | 1.4 (58)        | 2.5 (22)  | 33.3 (29) | 6.7 (25)  | 21.6 (56) | 9.0 (62)  | 2.2 (51)  |
| 36   | Bradyarrhythmia (050210)                                                                                                 | I440, I441, I442, I443, I444, I445, I446, I447, I450, I451, I452, I453, I454, I455, I458, I459, I46*, I495, T821                         | 7 331  | 0.6 | 85.8 (5)                                                  | 1.8 (43)        | 16.0 (4)  | 47.0 (17) | 16.3 (9)  | 62.3 (15) | 13.0 (50) | 17.1 (19) |
| 37   | Premature labour, threatened premature labour (120170)                                                                   | O470, O471, O479, O60                                                                                                                    | 7 161  | 0.6 | 0.0 (95)                                                  | 0.5 (87)        | 0.0 (82)  | 13.7 (71) | 0.0 (97)  | 17.9 (59) | 16.0 (34) | 0.0 (85)  |
| 38   | Other infectious disease                                                                                                 | A060, A061, A062, A063, A067, A068, A069, A07*,                                                                                          | 6 959  | 0.6 | 22.5 (82)                                                 | 0.3 (93)        | 0.8 (38)  | 11.6 (82) | 1.9 (51)  | 9.3 (73)  | 6.0 (82)  | 5.1 (36)  |

Supplemental Table

| Rank | Clinical diagnosis (Disease code)                                         | ICD-10 codes                                                                                                                                                                                                                                                                                                                                                                                                                                                                                                                                                                                                                                                                                                                                                                                                                                                                                                                                                                                                                                                                                        | N     | %   | Clinical and procedural characteristics, %/median, (rank) |                 |           |           |          |           |           |           |  |
|------|---------------------------------------------------------------------------|-----------------------------------------------------------------------------------------------------------------------------------------------------------------------------------------------------------------------------------------------------------------------------------------------------------------------------------------------------------------------------------------------------------------------------------------------------------------------------------------------------------------------------------------------------------------------------------------------------------------------------------------------------------------------------------------------------------------------------------------------------------------------------------------------------------------------------------------------------------------------------------------------------------------------------------------------------------------------------------------------------------------------------------------------------------------------------------------------------|-------|-----|-----------------------------------------------------------|-----------------|-----------|-----------|----------|-----------|-----------|-----------|--|
|      |                                                                           |                                                                                                                                                                                                                                                                                                                                                                                                                                                                                                                                                                                                                                                                                                                                                                                                                                                                                                                                                                                                                                                                                                     |       |     | Age ≥ 65                                                  | Comorbid Mental | Deep Coma | Ambulance | Tertiary | Surgery   | LOS       | Mortality |  |
|      | (excluding fungal infection) (180030)                                     | A180, A181, A184, A185, A186, A187, A188, A20*, A21*, A22*, A23*, A24*, A25*, A26*, A27*, A28*, A30*, A311, A318, A320, A328, A329, A33, A34, A35, A36*, A371, A38, A42*, A43*, A44*, A482, A484, A488, A49*, A68*, A690, A692, A698, A699, A70, A748, A749, A75*, A77*, A78, A79*, A90, A91, A92*, A93*, A94, A95*, A96*, A98*, A99, B001, B002, B008, B009, B03, B04, B07, B080, B081, B082, B084, B085, B088, B09, B258, B259, B260, B268, B269, B33*, B34*, B35*, B36*, B370, B372, B373, B374, B378, B379, B380, B381, B382, B383, B388, B389, B390, B391, B392, B394, B395, B399, B400, B401, B402, B403, B408, B409, B410, B418, B419, B420, B421, B428, B429, B430, B432, B438, B439, B442, B448, B449, B460, B461, B462, B463, B465, B468, B469, B47*, B48*, B49, B50*, B51*, B52*, B53*, B54, B55*, B56*, B57*, B580, B581, B583, B588, B589, B60*, B64, B650, B651, B652, B653, B658, B660, B661, B662, B663, B665, B668, B669, B67*, B68*, B69*, B70*, B71*, B72, B73, B74*, B75, B76*, B77*, B78*, B79, B80, B81*, B82*, B83*, B85*, B86, B87*, B88*, B90*, B91, B92, B94*, T793, U049 |       |     |                                                           |                 |           |           |          |           |           |           |  |
| 39   | Complications due to operation and procedure (180040)                     | T80*, T81*, T820, T822, T823, T824, T825, T826, T827, T828, T829, T83*, T84*, T85*, T86*, T87*, T880, T881, T882, T883, T884, T885, T886, T888, T889                                                                                                                                                                                                                                                                                                                                                                                                                                                                                                                                                                                                                                                                                                                                                                                                                                                                                                                                                | 6 943 | 0.6 | 53.2 (54)                                                 | 1.3 (60)        | 0.6 (45)  | 12.5 (80) | 2.0 (48) | 60.0 (19) | 10.0 (55) | 2.3 (49)  |  |
| 40   | Pancreas and spleen tumor (06007x)                                        | C25*, C261, D136, D137, D377                                                                                                                                                                                                                                                                                                                                                                                                                                                                                                                                                                                                                                                                                                                                                                                                                                                                                                                                                                                                                                                                        | 6 815 | 0.6 | 72.6 (17)                                                 | 1.9 (40)        | 0.6 (45)  | 12.0 (81) | 0.6 (78) | 41.2 (31) | 22.0 (18) | 34.9 (5)  |  |
| 41   | Drug poisoning (161070a)                                                  | T36*, T37*, T38*, T39*, T40*, T41*, T42*, T43*, T44*, T45*                                                                                                                                                                                                                                                                                                                                                                                                                                                                                                                                                                                                                                                                                                                                                                                                                                                                                                                                                                                                                                          | 6 748 | 0.6 | 13.4 (86)                                                 | 33.7 (1)        | 26.2 (2)  | 74.1 (2)  | 37.8 (1) | 1.7 (91)  | 2.0 (100) | 0.3 (74)  |  |
| 42   | Peritonitis, abdominal abscess (excluding female genital organs) (060370) | A183, K630, K631, K632, K65*, K67*                                                                                                                                                                                                                                                                                                                                                                                                                                                                                                                                                                                                                                                                                                                                                                                                                                                                                                                                                                                                                                                                  | 6 746 | 0.6 | 48.0 (59)                                                 | 1.6 (47)        | 1.0 (33)  | 28.5 (37) | 7.0 (24) | 56.6 (21) | 16.0 (34) | 7.7 (32)  |  |
| 43   | Acute pancreatitis (060350)                                               | B263, K85, K863, K871                                                                                                                                                                                                                                                                                                                                                                                                                                                                                                                                                                                                                                                                                                                                                                                                                                                                                                                                                                                                                                                                               | 6 494 | 0.6 | 43.6 (64)                                                 | 3.9 (7)         | 0.3 (60)  | 24.3 (44) | 4.5 (30) | 17.2 (61) | 14.0 (44) | 2.8 (45)  |  |
| 44   | Type 2 diabetes (excluding diabetic ketoacidosis) (100070)                | E112, E113, E114, E115, E116, E117, E118, E119                                                                                                                                                                                                                                                                                                                                                                                                                                                                                                                                                                                                                                                                                                                                                                                                                                                                                                                                                                                                                                                      | 6 265 | 0.5 | 58.1 (48)                                                 | 3.9 (7)         | 1.0 (33)  | 18.5 (57) | 1.0 (68) | 8.9 (74)  | 18.0 (27) | 0.9 (62)  |  |
| 45   | Inflammation with cerebrospinal infection (010080)                        | A066, A321, A390, A80*, A82*, A838, A839, A858, A88*, A89, B003, B004, B005, B010, B011, B020, B021, B050, B051, B060, B261, B262, B375, B384, B431, B582, G00*, G02*, G03*, G041, G042, G048, G049, G05*, G06*, G07, G08, G09, G958                                                                                                                                                                                                                                                                                                                                                                                                                                                                                                                                                                                                                                                                                                                                                                                                                                                                | 5 850 | 0.5 | 15.0 (85)                                                 | 1.3 (60)        | 4.0 (14)  | 20.8 (50) | 4.6 (28) | 8.0 (77)  | 9.0 (62)  | 2.2 (51)  |  |
| 46   | Subarachnoid haemorrhage, ruptured cerebral aneurysm (010020)             | I60*                                                                                                                                                                                                                                                                                                                                                                                                                                                                                                                                                                                                                                                                                                                                                                                                                                                                                                                                                                                                                                                                                                | 5 779 | 0.5 | 47.9 (60)                                                 | 0.8 (76)        | 33.9 (1)  | 76.0 (1)  | 30.3 (2) | 73.2 (11) | 28.0 (4)  | 26.9 (9)  |  |
| 47   | Bacterial enteritis (150020)                                              | A00*, A01*, A020, A022, A028, A029, A030, A031, A032, A033, A038, A039, A040, A041, A042, A043, A044, A045, A046, A047, A048, A049, A050, A052,                                                                                                                                                                                                                                                                                                                                                                                                                                                                                                                                                                                                                                                                                                                                                                                                                                                                                                                                                     | 5 632 | 0.5 | 25.1 (78)                                                 | 0.8 (76)        | 0.2 (68)  | 13.1 (74) | 0.6 (78) | 1.7 (91)  | 6.0 (82)  | 1.0 (60)  |  |

1  
2  
3  
4  
5  
6  
7  
8  
9  
10  
11  
12  
13  
14  
15  
16  
17  
18  
19  
20  
21  
22  
23  
24  
25  
26  
27  
28  
29  
30  
31  
32  
33  
34  
35  
36  
37  
38  
39  
40  
41  
42  
43  
44  
45  
46  
47  
48  
49

## Supplemental Table

| Rank | Clinical diagnosis (Disease code)                | ICD-10 codes                                                                                                                                                                                                                                                                                                                                                                                                                                                                                                                                                                                                                                                                                                                                                                                                                                                                                                                                                                                                                                                                                                                                                                                                                                                                                                                                                                                                                                                                      | N     | %   | Clinical and procedural characteristics, %/median, (rank) |                 |           |           |           |           |           |           |  |
|------|--------------------------------------------------|-----------------------------------------------------------------------------------------------------------------------------------------------------------------------------------------------------------------------------------------------------------------------------------------------------------------------------------------------------------------------------------------------------------------------------------------------------------------------------------------------------------------------------------------------------------------------------------------------------------------------------------------------------------------------------------------------------------------------------------------------------------------------------------------------------------------------------------------------------------------------------------------------------------------------------------------------------------------------------------------------------------------------------------------------------------------------------------------------------------------------------------------------------------------------------------------------------------------------------------------------------------------------------------------------------------------------------------------------------------------------------------------------------------------------------------------------------------------------------------|-------|-----|-----------------------------------------------------------|-----------------|-----------|-----------|-----------|-----------|-----------|-----------|--|
|      |                                                  |                                                                                                                                                                                                                                                                                                                                                                                                                                                                                                                                                                                                                                                                                                                                                                                                                                                                                                                                                                                                                                                                                                                                                                                                                                                                                                                                                                                                                                                                                   |       |     | Age ≥ 65                                                  | Comorbid Mental | Deep Coma | Ambulance | Tertiary  | Surgery   | LOS       | Mortality |  |
|      |                                                  | A053, A054, A058, A059                                                                                                                                                                                                                                                                                                                                                                                                                                                                                                                                                                                                                                                                                                                                                                                                                                                                                                                                                                                                                                                                                                                                                                                                                                                                                                                                                                                                                                                            |       |     |                                                           |                 |           |           |           |           |           |           |  |
| 48   | Herpes zoster (080020)                           | B022, B023, B027, B028, B029                                                                                                                                                                                                                                                                                                                                                                                                                                                                                                                                                                                                                                                                                                                                                                                                                                                                                                                                                                                                                                                                                                                                                                                                                                                                                                                                                                                                                                                      | 5 542 | 0.5 | 63.3 (38)                                                 | 2.6 (22)        | 0.0 (82)  | 2.8 (97)  | 0.1 (91)  | 0.9 (94)  | 8.0 (70)  | 0.1 (82)  |  |
| 49   | Respiratory failure (040130)                     | J96*                                                                                                                                                                                                                                                                                                                                                                                                                                                                                                                                                                                                                                                                                                                                                                                                                                                                                                                                                                                                                                                                                                                                                                                                                                                                                                                                                                                                                                                                              | 5 501 | 0.5 | 71.4 (20)                                                 | 2.7 (19)        | 9.5 (7)   | 42.3 (22) | 11.3 (13) | 10.9 (69) | 14.0 (44) | 21.8 (14) |  |
| 50   | Upper urinary tract disease (11012x)             | D301, D302, N132, N20*, N281, N288                                                                                                                                                                                                                                                                                                                                                                                                                                                                                                                                                                                                                                                                                                                                                                                                                                                                                                                                                                                                                                                                                                                                                                                                                                                                                                                                                                                                                                                | 5 291 | 0.5 | 28.8 (75)                                                 | 0.7 (82)        | 0.2 (68)  | 21.8 (48) | 0.9 (71)  | 38.9 (34) | 4.0 (95)  | 0.1 (82)  |  |
| 51   | Interstitial pneumonia (040110)                  | J60, J61, J62*, J63*, J64, J65, J66*, J67*, J68*, J70*, J82, J84*, J990, J991                                                                                                                                                                                                                                                                                                                                                                                                                                                                                                                                                                                                                                                                                                                                                                                                                                                                                                                                                                                                                                                                                                                                                                                                                                                                                                                                                                                                     | 5 266 | 0.5 | 78.8 (10)                                                 | 2.1 (31)        | 1.0 (33)  | 21.2 (49) | 4.6 (28)  | 6.3 (81)  | 21.0 (20) | 25.3 (11) |  |
| 52   | Ischemic enterocolitis (060190)                  | K55*                                                                                                                                                                                                                                                                                                                                                                                                                                                                                                                                                                                                                                                                                                                                                                                                                                                                                                                                                                                                                                                                                                                                                                                                                                                                                                                                                                                                                                                                              | 5 265 | 0.5 | 63.4 (37)                                                 | 1.1 (68)        | 0.6 (45)  | 17.3 (63) | 2.4 (39)  | 11.1 (68) | 10.0 (55) | 4.1 (38)  |  |
| 53   | Malignant tumour of gallbladder (060060)         | C23, C24*                                                                                                                                                                                                                                                                                                                                                                                                                                                                                                                                                                                                                                                                                                                                                                                                                                                                                                                                                                                                                                                                                                                                                                                                                                                                                                                                                                                                                                                                         | 5 159 | 0.4 | 84.1 (7)                                                  | 1.3 (60)        | 0.3 (60)  | 13.1 (74) | 0.8 (73)  | 58.2 (20) | 23.0 (11) | 28.8 (8)  |  |
| 54   | Brain tumour (010010)                            | C700, C709, C71*, C722, C723, C724, C793, D320, D329, D330, D331, D332, D333, D337, D339, D420, D429, D430, D431, D432, D433, D437, D439, G131, G132                                                                                                                                                                                                                                                                                                                                                                                                                                                                                                                                                                                                                                                                                                                                                                                                                                                                                                                                                                                                                                                                                                                                                                                                                                                                                                                              | 4 883 | 0.4 | 47.6 (62)                                                 | 1.7 (44)        | 3.2 (18)  | 28.2 (38) | 4.4 (31)  | 34.2 (40) | 23.0 (11) | 17.1 (19) |  |
| 55   | Spinal stenosis (including spondylosis) (07034x) | G551, G552, G553, G558, G950, G951, G952, G959, M4320, M4321, M4322, M4323, M4324, M4325, M4326, M4327, M4328, M4329, M4700, M4701, M4702, M4703, M4704, M4705, M4706, M4707, M4708, M4709, M4710, M4711, M4712, M4713, M4714, M4715, M4716, M4717, M4718, M4719, M4720, M4721, M4722, M4723, M4724, M4725, M4726, M4727, M4728, M4729, M4780, M4781, M4782, M4783, M4784, M4785, M4786, M4787, M4788, M4789, M4790, M4791, M4792, M4793, M4794, M4795, M4796, M4797, M4798, M4799, M4800, M4801, M4802, M4803, M4804, M4805, M4806, M4807, M4808, M4809, M4810, M4811, M4812, M4813, M4814, M4815, M4816, M4817, M4818, M4819, M4820, M4821, M4822, M4823, M4824, M4825, M4826, M4827, M4828, M4829, M4830, M4831, M4832, M4833, M4834, M4835, M4836, M4837, M4838, M4839, M4840, M4841, M4842, M4843, M4844, M4845, M4846, M4847, M4848, M4849, M4850, M4851, M4852, M4853, M4854, M4855, M4856, M4857, M4858, M4859, M4880, M4881, M4882, M4883, M4884, M4885, M4886, M4887, M4888, M4889, M4890, M4891, M4892, M4893, M4894, M4895, M4896, M4897, M4898, M4899, M4940, M4941, M4942, M4943, M4944, M4945, M4946, M4947, M4948, M4949, M4980, M4981, M4982, M4983, M4984, M4985, M4986, M4987, M4988, M4989, M5300, M5301, M5302, M5303, M5304, M5305, M5306, M5307, M5308, M5309, M5310, M5311, M5312, M5313, M5314, M5315, M5316, M5317, M5318, M5319, M5330, M5331, M5332, M5333, M5334, M5335, M5336, M5337, M5338, M5339, M5380, M5381, M5382, M5383, M5384, M5385, M5386 | 4 807 | 0.4 | 77.3 (12)                                                 | 2.0 (37)        | 0.0 (82)  | 23.6 (45) | 1.0 (68)  | 23.5 (52) | 20.0 (25) | 0.5 (69)  |  |

## Supplemental Table

| Rank | Clinical diagnosis (Disease code)                                                              | ICD*10 codes                                                                                                                                                                                                                                                                                                                                                                                                                                                                                                                                                                                                                                                | N     | %   | Clinical and procedural characteristics, %/median, (rank) |                 |           |           |          |           |           |           |  |
|------|------------------------------------------------------------------------------------------------|-------------------------------------------------------------------------------------------------------------------------------------------------------------------------------------------------------------------------------------------------------------------------------------------------------------------------------------------------------------------------------------------------------------------------------------------------------------------------------------------------------------------------------------------------------------------------------------------------------------------------------------------------------------|-------|-----|-----------------------------------------------------------|-----------------|-----------|-----------|----------|-----------|-----------|-----------|--|
|      |                                                                                                |                                                                                                                                                                                                                                                                                                                                                                                                                                                                                                                                                                                                                                                             |       |     | Age ≥ 65                                                  | Comorbid Mental | Deep Coma | Ambulance | Tertiary | Surgery   | LOS       | Mortality |  |
|      |                                                                                                | M5387, M5388, M5389, M5390, M5391, M5392, M5393, M5394, M5395, M5396, M5397, M5398, M5399, M9950, M9951, M9952, M9953, M9954, M9955, M9956, M9957, M9958, M9959, M9960, M9961, M9962, M9963, M9964, M9965, M9966, M9967, M9968, M9969, M9970, M9971, M9972, M9973, M9974, M9975, M9976, M9977, M9978, M9979                                                                                                                                                                                                                                                                                                                                                 |       |     |                                                           |                 |           |           |          |           |           |           |  |
| 56   | Anaemia (I30090)                                                                               | D500, D501, D508, D509, D510, D511, D512, D513, D518, D519, D520, D521, D528, D529, D530, D531, D532, D538, D539, D550, D551, D552, D559, D560, D561, D562, D563, D564, D569, D570, D571, D572, D573, D580, D581, D582, D588, D589, D590, D591, D592, D593, D594, D595, D596, D599, D62, D640, D641, D642, D643, D644, D648, D649                                                                                                                                                                                                                                                                                                                           | 4 756 | 0.4 | 63.1 (40)                                                 | 2.0 (37)        | 0.6 (45)  | 18.6 (56) | 1.9 (51) | 37.7 (36) | 11.0 (51) | 3.8 (39)  |  |
| 57   | Maternal care related to the fetus and amniotic cavity and possible delivery problems (I20180) | O30*, O31*, O32*, O33*, O34*, O35*, O36*, O40, O41*, O42*, O43*, O44*, O45*, O46*, O48                                                                                                                                                                                                                                                                                                                                                                                                                                                                                                                                                                      | 4 658 | 0.4 | 0.0 (95)                                                  | 0.4 (90)        | 0.0 (82)  | 13.3 (73) | 0.1 (91) | 70.6 (12) | 9.0 (62)  | 0.0 (85)  |  |
| 58   | Malignant tumour of rectum and anus (rectosigmoid colon to anus) (O60040)                      | C19, C20, C21*, D011, D012, D013, D014                                                                                                                                                                                                                                                                                                                                                                                                                                                                                                                                                                                                                      | 4 646 | 0.4 | 63.6 (35)                                                 | 1.9 (40)        | 0.4 (52)  | 14.6 (68) | 1.1 (65) | 49.8 (25) | 23.0 (11) | 21.0 (16) |  |
| 59   | Nontraumatic subdural haemorrhage (O10050)                                                     | I620, I621                                                                                                                                                                                                                                                                                                                                                                                                                                                                                                                                                                                                                                                  | 4 606 | 0.4 | 85.8 (5)                                                  | 2.2 (30)        | 2.7 (20)  | 27.9 (39) | 9.7 (18) | 92.6 (4)  | 10.0 (55) | 1.9 (54)  |  |
| 60   | Acute renal failure (I10290)                                                                   | K767, N17*                                                                                                                                                                                                                                                                                                                                                                                                                                                                                                                                                                                                                                                  | 4 034 | 0.3 | 70.1 (21)                                                 | 3.0 (16)        | 2.7 (20)  | 31.5 (32) | 7.3 (23) | 27.0 (49) | 15.0 (38) | 14.2 (22) |  |
| 61   | Intervertebral disk degeneration, disk herniation (O70350)                                     | M50*, M51*                                                                                                                                                                                                                                                                                                                                                                                                                                                                                                                                                                                                                                                  | 4 004 | 0.3 | 20.2 (84)                                                 | 1.6 (47)        | 0.0 (82)  | 27.4 (40) | 0.2 (89) | 28.8 (47) | 15.0 (38) | 0.0 (85)  |  |
| 62   | Autoimmune disease with systemic organ disease (O70560)                                        | D86*, I00, L88, L92*, L93*, L940, L941, L942, L943, L95*, L982, L983, M0200, M0208, M0209, M0210, M0218, M0219, M0220, M0228, M0229, M0280, M0288, M0289, M0290, M0298, M0299, M0300, M0310, M0320, M0360, M0720, M0740, M0748, M0749, M0750, M0758, M0759, M0760, M0768, M0769, M0830, M0838, M0839, M0840, M0848, M0849, M0880, M0888, M0889, M0890, M0898, M0899, M091*, M092*, M098*, M120*, M121*, M1230, M1238, M1239, M1300, M1302, M1303, M1305, M1310, M1380, M1390, M150, M153, M154, M158, M159, M1900, M300, M301, M302, M308, M31*, M32*, M330, M331, M332, M339, M34*, M350, M351, M352, M353, M354, M355, M356, M357, M358, M359, M36*, M633 | 3 864 | 0.3 | 45.3 (63)                                                 | 3.0 (16)        | 0.5 (50)  | 12.9 (76) | 1.8 (53) | 11.6 (66) | 21.0 (20) | 4.5 (37)  |  |
| 63   | Peritonsillar abscess (O30240)                                                                 | J36                                                                                                                                                                                                                                                                                                                                                                                                                                                                                                                                                                                                                                                         | 3 811 | 0.3 | 10.3 (89)                                                 | 0.3 (93)        | 0.0 (82)  | 2.3 (98)  | 0.2 (89) | 35.0 (39) | 6.0 (82)  | 0.0 (85)  |  |
| 64   | Dystocia with complication of labour or obstetric operation (I20260)                           | O61*, O62*, O63*, O64*, O65*, O66*, O67*, O68*, O69*, O70*, O71*, O720, O721, O722, O73*, O74*, O75*, O81*, O82*, O83*, O84*                                                                                                                                                                                                                                                                                                                                                                                                                                                                                                                                | 3 646 | 0.3 | 0.0 (95)                                                  | 0.4 (90)        | 0.0 (82)  | 13.6 (72) | 0.5 (80) | 84.8 (7)  | 8.0 (70)  | 0.0 (85)  |  |



Supplemental Table

| Rank | Clinical diagnosis (Disease code)                                                   | ICD-10 codes                                                                                                                                                                                                                                                                                  | N     | %   | Clinical and procedural characteristics, %/median, (rank) |                 |           |           |           |           |           |           |
|------|-------------------------------------------------------------------------------------|-----------------------------------------------------------------------------------------------------------------------------------------------------------------------------------------------------------------------------------------------------------------------------------------------|-------|-----|-----------------------------------------------------------|-----------------|-----------|-----------|-----------|-----------|-----------|-----------|
|      |                                                                                     |                                                                                                                                                                                                                                                                                               |       |     | Age ≥ 65                                                  | Comorbid Mental | Deep Coma | Ambulance | Tertiary  | Surgery   | LOS       | Mortality |
| 65   | Disseminated intravascular coagulation (I30100)                                     | D65, D683, O723                                                                                                                                                                                                                                                                               | 3 631 | 0.3 | 72.0 (18)                                                 | 2.1 (31)        | 8.3 (8)   | 45.5 (18) | 13.9 (11) | 49.6 (26) | 23.0 (11) | 46.0 (1)  |
| 66   | Other humoral/electrolyte/acid–base balance disorders (I00393)                      | E870, E871, E872, E873, E874, E875, E877, E878                                                                                                                                                                                                                                                | 3 622 | 0.3 | 61.5 (45)                                                 | 7.0 (4)         | 4.0 (14)  | 32.3 (30) | 8.3 (20)  | 4.6 (86)  | 8.0 (70)  | 2.7 (46)  |
| 67   | Kawasaki disease (I500709)                                                          | M303                                                                                                                                                                                                                                                                                          | 3 576 | 0.3 | 0.0 (95)                                                  | 0.0 (98)        | 0.0 (82)  | 2.1 (99)  | 0.0 (97)  | 0.8 (95)  | 11.0 (51) | 0.0 (85)  |
| 68   | Retinal detachment (O20160)                                                         | H330, H332, H333, H334, H335                                                                                                                                                                                                                                                                  | 3 566 | 0.3 | 23.4 (80)                                                 | 0.3 (93)        | 0.0 (82)  | 0.2 (100) | 0.0 (97)  | 99.2 (1)  | 14.0 (44) | 0.0 (85)  |
| 69   | Non–Hodgkin lymphoma (I30030)                                                       | C820, C821, C822, C827, C829, C830, C831, C832, C833, C834, C835, C836, C837, C838, C839, C840, C841, C842, C843, C844, C845, C850, C851, C857, C859                                                                                                                                          | 3 492 | 0.3 | 68.0 (24)                                                 | 1.7 (44)        | 0.7 (41)  | 13.9 (70) | 2.0 (48)  | 38.5 (35) | 29.0 (3)  | 24.3 (13) |
| 70   | Sudden idiopathic hearing loss (O30428)                                             | H912                                                                                                                                                                                                                                                                                          | 3 489 | 0.3 | 33.9 (71)                                                 | 0.6 (85)        | 0.0 (82)  | 5.3 (94)  | 0.1 (91)  | 2.1 (89)  | 10.0 (55) | 0.0 (85)  |
| 71   | Hypertension or other diseases associated with pregnancy/labour/puerperium (I20160) | O10*, O11, O12*, O13, O14*, O15*, O16, O21*, O22*, O23*, O25, O26*                                                                                                                                                                                                                            | 3 480 | 0.3 | 0.1 (93)                                                  | 0.8 (76)        | 0.1 (75)  | 10.7 (84) | 0.3 (87)  | 30.6 (45) | 9.0 (62)  | 0.0 (85)  |
| 72   | Other digestive tract disorders (O60570)                                            | K00*, K01*, K02*, K03*, K04*, K05*, K06*, K08*, K09*, K10*, K14*, K319, K590, K591, K592, K594, K598, K599, K629, K66*, K759, K764, K769, K918, K919                                                                                                                                          | 3 420 | 0.3 | 48.2 (58)                                                 | 2.6 (22)        | 0.3 (60)  | 17.7 (61) | 2.2 (43)  | 10.0 (72) | 8.0 (70)  | 2.0 (53)  |
| 73   | Arteriosclerosis obliterans (O50170)                                                | I700, I702, I708, I709, I720, I721, I724, I73*, I740, I741, I742, I743, I744, I745, I748, I749                                                                                                                                                                                                | 3 393 | 0.3 | 82.1 (9)                                                  | 1.1 (68)        | 0.6 (45)  | 22.9 (46) | 4.4 (31)  | 60.9 (18) | 18.0 (27) | 9.1 (28)  |
| 74   | Febrile convulsion (I50040)                                                         | R560                                                                                                                                                                                                                                                                                          | 3 365 | 0.3 | 0.1 (93)                                                  | 0.0 (98)        | 4.2 (13)  | 55.2 (9)  | 1.0 (68)  | 0.4 (98)  | 4.0 (95)  | 0.0 (85)  |
| 75   | Fracture/dislocation of ankle joint or foot (I60850)                                | M8437, S8250, S8260, S8280, S9200, S9210, S9220, S9230, S9240, S9250, S9270, S9290, S930, S931, S932, S933                                                                                                                                                                                    | 3 345 | 0.3 | 36.3 (69)                                                 | 2.1 (31)        | 0.0 (82)  | 28.8 (36) | 1.8 (53)  | 83.5 (8)  | 27.0 (5)  | 0.0 (85)  |
| 76   | Periarticular fracture/dislocation of knee (I60820)                                 | S7240, S8200, S8210, S8270                                                                                                                                                                                                                                                                    | 3 343 | 0.3 | 66.3 (29)                                                 | 2.4 (27)        | 0.2 (68)  | 38.6 (24) | 1.4 (60)  | 69.1 (13) | 35.0 (1)  | 0.4 (73)  |
| 77   | Influenza, viral pneumonia (O40070)                                                 | J10*, J11*, J12*                                                                                                                                                                                                                                                                              | 3 309 | 0.3 | 4.4 (92)                                                  | 0.3 (93)        | 0.3 (60)  | 6.8 (92)  | 0.1 (91)  | 1.2 (93)  | 6.0 (82)  | 0.2 (79)  |
| 78   | Multiple injuries (I60990)                                                          | S434, S435, S436, S437, S49*, S59*, S69*, S79*, S89*, S99*, T00*, T01*, T02*, T03*, T04*, T06*, T07                                                                                                                                                                                           | 3 254 | 0.3 | 57.3 (50)                                                 | 3.6 (10)        | 1.6 (26)  | 65.2 (5)  | 15.9 (10) | 40.5 (32) | 19.0 (26) | 0.8 (64)  |
| 79   | Fulminant hepatitis, acute liver failure, acute hepatitis (O60270)                  | B150, B159, B160, B161, B162, B169, B170, B171, B172, B178, B19*, B251, K710, K711, K712, K719, K720, K762, K763                                                                                                                                                                              | 3 212 | 0.3 | 28.8 (75)                                                 | 2.1 (31)        | 1.2 (31)  | 10.8 (83) | 2.8 (38)  | 6.8 (79)  | 14.0 (44) | 7.8 (31)  |
| 80   | Chronic obstructive lung disease (O40120)                                           | J43*, J44*                                                                                                                                                                                                                                                                                    | 3 165 | 0.3 | 87.7 (3)                                                  | 2.1 (31)        | 1.5 (29)  | 31.4 (33) | 3.8 (34)  | 4.7 (85)  | 15.0 (38) | 10.7 (25) |
| 81   | Unspecified injury (I61060)                                                         | T090, T091, T092, T093, T094, T095, T098, T099, T10*, T110, T119, T12*, T130, T131, T132, T133, T134, T135, T138, T139, T140, T141, T142*, T143, T144, T145, T146, T148, T149, T189, T288, T289, T66, T71, T73*, T751, T753, T758, T782, T783, T784, T788, T789, T794, T795, T797, T798, T799 | 3 127 | 0.3 | 32.7 (73)                                                 | 2.9 (18)        | 5.5 (12)  | 54.2 (10) | 20.1 (7)  | 25.7 (50) | 3.0 (98)  | 3.8 (39)  |
| 82   | Haemorrhage in early                                                                | O20*                                                                                                                                                                                                                                                                                          | 3 108 | 0.3 | 0.0 (95)                                                  | 0.4 (90)        | 0.0 (82)  | 5.2 (95)  | 0.1 (91)  | 8.3 (75)  | 9.0 (62)  | 0.0 (85)  |



Supplemental Table

| Rank | Clinical diagnosis (Disease code)                                                  | ICD-10 codes                                                                                                                                                                                                      | N     | %   | Clinical and procedural characteristics, %/median, (rank) |                 |           |           |           |           |           |           |  |
|------|------------------------------------------------------------------------------------|-------------------------------------------------------------------------------------------------------------------------------------------------------------------------------------------------------------------|-------|-----|-----------------------------------------------------------|-----------------|-----------|-----------|-----------|-----------|-----------|-----------|--|
|      |                                                                                    |                                                                                                                                                                                                                   |       |     | Age ≥ 65                                                  | Comorbid Mental | Deep Coma | Ambulance | Tertiary  | Surgery   | LOS       | Mortality |  |
|      |                                                                                    | pregnancy (120150)                                                                                                                                                                                                |       |     |                                                           |                 |           |           |           |           |           |           |  |
| 83   | Leucocytic disease (130070)                                                        | D70, D720, D721, D728, D729                                                                                                                                                                                       | 3 049 | 0.3 | 48.9 (56)                                                 | 1.2 (66)        | 0.1 (75)  | 4.8 (96)  | 0.5 (80)  | 17.7 (60) | 7.0 (78)  | 2.9 (43)  |  |
| 84   | Dissecting aneurysm (050161)                                                       | I710                                                                                                                                                                                                              | 2 974 | 0.3 | 64.4 (32)                                                 | 1.6 (47)        | 2.2 (23)  | 58.8 (7)  | 21.5 (4)  | 33.7 (41) | 23.0 (11) | 10.2 (26) |  |
| 85   | Alcoholic liver disease (060280)                                                   | K70*                                                                                                                                                                                                              | 2 964 | 0.3 | 30.7 (74)                                                 | 14.7 (2)        | 1.6 (26)  | 25.2 (43) | 2.4 (39)  | 12.7 (64) | 14.0 (44) | 9.4 (27)  |  |
| 86   | Male genital diseases (11022x)                                                     | D294, I861, N41*, N43*, N44, N45*, N46, N47, N48*, N508                                                                                                                                                           | 2 841 | 0.2 | 53.3 (53)                                                 | 0.9 (73)        | 0.0 (82)  | 8.9 (89)  | 0.7 (75)  | 15.3 (62) | 8.0 (70)  | 0.3 (74)  |  |
| 87   | Pulmonary/mediastinal infection and abscess (040150)                               | A065, B440, B441, B45*, B659, B664, E321, E328, J850, J851, J852, J853, J86*, J985                                                                                                                                | 2 834 | 0.2 | 62.2 (42)                                                 | 2.6 (22)        | 0.7 (41)  | 20.4 (51) | 3.8 (34)  | 18.9 (58) | 24.0 (9)  | 11.4 (23) |  |
| 88   | Malignant tumour of oesophagus (including cervical region) (060010)                | C150, C151, C152, C153, C154, C155, C158, C159, D001                                                                                                                                                              | 2 805 | 0.2 | 66.6 (28)                                                 | 2.0 (37)        | 0.4 (52)  | 12.7 (77) | 0.7 (75)  | 36.5 (38) | 22.0 (18) | 30.9 (6)  |  |
| 89   | Pelvic injury (160980)                                                             | S321*, S322*, S323*, S324*, S325*, S327*, S328*, S332, S333, S334, S335, S336, S337, S348, S377*, S378*, S379*, S383, S39*                                                                                        | 2 783 | 0.2 | 67.7 (25)                                                 | 3.2 (13)        | 0.7 (41)  | 53.3 (12) | 10.2 (17) | 22.6 (54) | 25.0 (7)  | 1.0 (60)  |  |
| 90   | Muscle and tendon injury of the extremities (160610)                               | M620*, M621*, M623*, M626*, M628*, M629*, M660*, M661*, M662*, M663*, M664*, M665*, S46*, S534, S56*, S633, S634, S635, S636, S637, S66*, S731, S76*, S86*, S934, S935, S936, S96*, T112, T115                    | 2 700 | 0.2 | 33.3 (72)                                                 | 4.5 (5)         | 0.8 (38)  | 30.8 (34) | 3.6 (36)  | 55.5 (22) | 10.0 (55) | 0.6 (66)  |  |
| 91   | Retroperitoneal disease (110050)                                                   | C786, D200, D483                                                                                                                                                                                                  | 2 695 | 0.2 | 65.1 (31)                                                 | 1.6 (47)        | 0.4 (52)  | 12.7 (77) | 0.9 (71)  | 28.4 (48) | 21.0 (20) | 45.7 (2)  |  |
| 92   | Chemical poisoning (161070b)                                                       | T46*, T47*, T48*, T49*, T50*, T51*, T52*, T53*, T54*, T55, T56*, T57*, T58, T59*, T60*, T61*, T62*, T63*, T64, T65*, T887                                                                                         | 2 694 | 0.2 | 40.5 (68)                                                 | 9.0 (3)         | 7.9 (10)  | 52.6 (13) | 21.3 (6)  | 12.7 (64) | 3.0 (98)  | 3.8 (39)  |  |
| 93   | Facial injury (including oral/pharyngeal injury) (160200)                          | S003, S004, S005, S012, S013, S014, S015, S022*, S023*, S024*, S025*, S026*, S027*, S028*, S029*, S041, S042, S043, S044, S045, S046, S047, S048, S049, S070, S078, S081, S088, S099, S100, S101, T180            | 2 576 | 0.2 | 24.3 (79)                                                 | 2.6 (22)        | 1.9 (25)  | 53.4 (11) | 11.3 (13) | 55.0 (24) | 5.0 (89)  | 0.6 (66)  |  |
| 94   | Malignant tumour of bone or soft tissue (excluding spine and spinal cord) (070040) | C400, C401, C402, C403, C408, C409, C413, C418, C419, C471, C472, C473, C474, C475, C476, C478, C479, C491, C492, C493, C494, C495, C496, C498, C499, C764, C765, C773, C774, C795, C96*, D092, D097              | 2 550 | 0.2 | 63.1 (40)                                                 | 3.5 (11)        | 0.2 (68)  | 17.5 (62) | 0.5 (80)  | 24.1 (51) | 25.0 (7)  | 24.4 (12) |  |
| 95   | Malignant prostatic tumour (110080)                                                | C61, C637, D075                                                                                                                                                                                                   | 2 549 | 0.2 | 90.3 (2)                                                  | 1.3 (60)        | 0.7 (41)  | 15.6 (65) | 0.5 (80)  | 23.1 (53) | 16.0 (34) | 21.8 (14) |  |
| 96   | Periarticular fracture/dislocation of elbow (160740)                               | S4240, S5200, S5210, S530, S531                                                                                                                                                                                   | 2 494 | 0.2 | 20.3 (83)                                                 | 0.7 (82)        | 0.0 (82)  | 18.8 (54) | 0.8 (73)  | 95.8 (2)  | 4.0 (95)  | 0.2 (79)  |  |
| 97   | Fracture of forearm (160760)                                                       | S5220, S5230, S5240, S5250, S5270, S5280, S5290                                                                                                                                                                   | 2 463 | 0.2 | 41.0 (67)                                                 | 0.5 (87)        | 0.1 (75)  | 27.1 (41) | 1.6 (55)  | 95.4 (3)  | 7.0 (78)  | 0.0 (85)  |  |
| 98   | Diabetic ketoacidosis, nonketotic coma (100040)                                    | E100, E101, E110, E111, E130, E131, E140, E141                                                                                                                                                                    | 2 444 | 0.2 | 41.7 (66)                                                 | 4.0 (6)         | 9.8 (6)   | 44.7 (20) | 10.4 (15) | 4.9 (84)  | 15.0 (38) | 3.4 (42)  |  |
| 99   | Other musculoskeletal/connective tissue diseases (071030)                          | M!!!!, M0000, M0008, M0009, M0010, M0018, M0019, M0020, M0028, M0029, M0080, M0088, M0089, M0090, M0098, M0099, M0100, M0108, M0109, M0110, M0118, M0119, M0120, M0128, M0129, M0130, M0138, M0139, M0140, M0148, | 2 389 | 0.2 | 47.7 (61)                                                 | 1.3 (60)        | 0.0 (82)  | 47.1 (16) | 0.5 (80)  | 5.5 (83)  | 8.0 (70)  | 0.5 (69)  |  |

1  
2  
3  
4  
5  
6  
7  
8  
9  
10  
11  
12  
13  
14  
15  
16  
17  
18  
19  
20  
21  
22  
23  
24  
25  
26  
27  
28  
29  
30  
31  
32  
33  
34  
35  
36  
37  
38  
39  
40  
41  
42  
43  
44  
45  
46  
47  
48  
49

## Supplemental Table

| Rank | Clinical diagnosis (Disease code)                    | ICD-10 codes                                                                                                                                                                                                                                                                                                                                                                                                                                                                                                                                                                                                                                                                                                                                                                                                                                                                                                                                                                                                                                                                                                                                                                                                                                                                                                                                                                                                                                                                                                                                                                                                                                | N     | %   | Clinical and procedural characteristics, %/median, (rank) |                 |           |           |          |          |           |           |  |
|------|------------------------------------------------------|---------------------------------------------------------------------------------------------------------------------------------------------------------------------------------------------------------------------------------------------------------------------------------------------------------------------------------------------------------------------------------------------------------------------------------------------------------------------------------------------------------------------------------------------------------------------------------------------------------------------------------------------------------------------------------------------------------------------------------------------------------------------------------------------------------------------------------------------------------------------------------------------------------------------------------------------------------------------------------------------------------------------------------------------------------------------------------------------------------------------------------------------------------------------------------------------------------------------------------------------------------------------------------------------------------------------------------------------------------------------------------------------------------------------------------------------------------------------------------------------------------------------------------------------------------------------------------------------------------------------------------------------|-------|-----|-----------------------------------------------------------|-----------------|-----------|-----------|----------|----------|-----------|-----------|--|
|      |                                                      |                                                                                                                                                                                                                                                                                                                                                                                                                                                                                                                                                                                                                                                                                                                                                                                                                                                                                                                                                                                                                                                                                                                                                                                                                                                                                                                                                                                                                                                                                                                                                                                                                                             |       |     | Age ≥ 65                                                  | Comorbid Mental | Deep Coma | Ambulance | Tertiary | Surgery  | LOS       | Mortality |  |
|      |                                                      | M0149, M0150, M0158, M0159, M0160, M0168, M0169, M0180, M0188, M0189, M0308, M0309, M0312, M0318, M0319, M0328, M0329, M0368, M0369, M1240, M1248, M1249, M1250, M1258, M1259, M1280, M1288, M1289, M1309, M1319, M1389, M1399, M1908, M1909, M1910, M1918, M1919, M1920, M1928, M1929, M1980, M1988, M1989, M1990, M1998, M1999, M2100, M2108, M2109, M2110, M2118, M2119, M2120, M2128, M2129, M2170, M2178, M2179, M2180, M2188, M2189, M2190, M2198, M2199, M2450, M2458, M2459, M2460, M2468, M2469, M2480, M2488, M2489, M2500, M2508, M2509, M2510, M2518, M2519, M2540, M2548, M2549, M2550, M2551, M2552, M2554, M2555, M2556, M2557, M2558, M2559, M2560, M2568, M2569, M2570, M2578, M2579, M2580, M2588, M2589, M2590, M2598, M2599, M540*, M541*, M542*, M543*, M544*, M545*, M546*, M548*, M549*, M671, M678, M679, M798*, M799*, M8300, M8301, M8302, M8303, M8304, M8305, M8307, M8308, M8309, M8310, M8311, M8312, M8313, M8314, M8315, M8317, M8318, M8319, M8320, M8321, M8322, M8323, M8324, M8325, M8327, M8328, M8329, M8330, M8331, M8332, M8333, M8334, M8335, M8337, M8338, M8339, M8340, M8341, M8342, M8343, M8344, M8345, M8347, M8348, M8349, M8350, M8351, M8352, M8353, M8354, M8355, M8357, M8358, M8359, M8380, M8381, M8382, M8383, M8384, M8385, M8387, M8388, M8389, M8390, M8391, M8392, M8393, M8394, M8395, M8397, M8398, M8399, M852*, M858*, M859*, M8600, M8800, M8801, M8802, M8803, M8804, M8805, M8806, M8807, M8809, M889*, M900*, M901*, M902*, M906*, M907*, M913*, M938, M951, M952, M953, M954, M955, M958, M959, M961, M966, M968, M969, M990*, M991*, M992*, M993*, M994*, M998*, M999* |       |     |                                                           |                 |           |           |          |          |           |           |  |
| 100  | Fracture or dislocation around the shoulder (160720) | M2431, M2441, S4220, S4230, S4270, S4280, S4290, S430, S431, S432, S433                                                                                                                                                                                                                                                                                                                                                                                                                                                                                                                                                                                                                                                                                                                                                                                                                                                                                                                                                                                                                                                                                                                                                                                                                                                                                                                                                                                                                                                                                                                                                                     | 2 370 | 0.2 | 68.9 (22)                                                 | 3.1 (15)        | 0.0 (82)  | 35.6 (26) | 2.2 (43) | 76.8 (9) | 21.0 (20) | 0.6 (66)  |  |

Rankings were based on data from the top 100 causes of admissions. Comorbidity of mental illness was defined as the following ICD-10 codes as comorbidities: unipolar depressive disorders (F32–F33), bipolar affective disorder (F30–F31), schizophrenia (F20–F29), alcohol use disorders (F10), drug use disorders (F11–F16 and F18–F19), post-traumatic stress disorder (F431), obsessive-compulsive disorder (F42), panic disorder (F40 and F410), or insomnia (F51). Deep coma was defined as a score on the Japan Soma Scale of 100 or more. Ambulance, ambulance services; LOS, median length of stay; Mortality, in-hospital mortality; Surgery, surgical procedures; Tertiary, tertiary emergency medical services; \*, wild card; M!!!, ICD-10 code numbers starting with ‘M’ not elsewhere classified.



**Comparison of emergency hospital admissions for drug poisoning and major diseases: a retrospective observational study using a nationwide administrative discharge database**

|                                 |                                                                                                                                                                                                                                                                                                                                                                                                                                                                                                                                                                                                                                                                                                                  |
|---------------------------------|------------------------------------------------------------------------------------------------------------------------------------------------------------------------------------------------------------------------------------------------------------------------------------------------------------------------------------------------------------------------------------------------------------------------------------------------------------------------------------------------------------------------------------------------------------------------------------------------------------------------------------------------------------------------------------------------------------------|
| Journal:                        | <i>BMJ Open</i>                                                                                                                                                                                                                                                                                                                                                                                                                                                                                                                                                                                                                                                                                                  |
| Manuscript ID:                  | bmjopen-2012-001857.R2                                                                                                                                                                                                                                                                                                                                                                                                                                                                                                                                                                                                                                                                                           |
| Article Type:                   | Research                                                                                                                                                                                                                                                                                                                                                                                                                                                                                                                                                                                                                                                                                                         |
| Date Submitted by the Author:   | 06-Nov-2012                                                                                                                                                                                                                                                                                                                                                                                                                                                                                                                                                                                                                                                                                                      |
| Complete List of Authors:       | Okumura, Yasuyuki; National Institute of Mental Health, National Center of Neurology and Psychiatry, Department of Social Psychiatry<br>Shimizu, Sayuri; Institute for Health Economics and Policy, Research Department<br>Ishikawa, Koichi; National Cancer Center, Statistics and Cancer Control Division<br>Matsuda, Shinya; University of Occupational and Environmental Health, Department of Preventive Medicine and Community Health<br>Fushimi, Kiyohide; Tokyo Medical and Dental University Graduate School of Medicine, Department of Health Policy and Informatics<br>Ito, Hiroto; National Institute of Mental Health, National Center of Neurology and Psychiatry, Department of Social Psychiatry |
| <b>Primary Subject Heading</b>: | Epidemiology                                                                                                                                                                                                                                                                                                                                                                                                                                                                                                                                                                                                                                                                                                     |
| Secondary Subject Heading:      | Mental health, Emergency medicine                                                                                                                                                                                                                                                                                                                                                                                                                                                                                                                                                                                                                                                                                |
| Keywords:                       | Suicide & self-harm < PSYCHIATRY, EPIDEMIOLOGY, HEALTH SERVICES ADMINISTRATION & MANAGEMENT                                                                                                                                                                                                                                                                                                                                                                                                                                                                                                                                                                                                                      |
|                                 |                                                                                                                                                                                                                                                                                                                                                                                                                                                                                                                                                                                                                                                                                                                  |

SCHOLARONE™  
Manuscripts

1  
2  
3  
4  
5  
6  
7  
8  
9  
10  
11  
12  
13  
14  
15  
16  
17  
18  
19  
20  
21  
22  
23  
24  
25  
26  
27  
28  
29  
30  
31  
32  
33  
34  
35  
36  
37  
38  
39  
40  
41  
42  
43  
44  
45  
46  
47  
48  
49  
50  
51  
52  
53  
54  
55  
56  
57  
58  
59  
60

# Comparison of emergency hospital admissions for drug poisoning and major diseases: a retrospective observational study using a nationwide administrative discharge database

Yasuyuki Okumura,<sup>1</sup> Sayuri Shimizu,<sup>2</sup> Koichi B. Ishikawa,<sup>3</sup> Shinya Matsuda,<sup>4</sup> Kiyohide Fushimi,<sup>5</sup> Hiroto Ito<sup>1</sup>

<sup>1</sup> Department of Social Psychiatry, National Institute of Mental Health, National Center of Neurology and Psychiatry, Tokyo 187-8553, Japan

<sup>2</sup> Research Department, Institute for Health Economics and Policy, Tokyo105-0003, Japan

<sup>3</sup> Statistics and Cancer Control Division, National Cancer Center, Tokyo 104-0045, Japan

<sup>4</sup> Department of Preventive Medicine and Community Health, University of Occupational and Environmental Health, Kitakyushu 807-8555, Japan

<sup>5</sup> Department of Health Policy and Informatics, Tokyo Medical and Dental University Graduate School of Medicine, Tokyo 113-8510, Japan

**Correspondence to** Yasuyuki Okumura, Department of Social Psychiatry, National Institute of Mental Health, National Center of Neurology and Psychiatry, 4-1-1 Ogawa-Higashi cho, Kodaira 187-8553, Tokyo, Japan; Tel.: + 81 42 346 2046; Fax: +81 42 346 2047; Email: yokumura@ncnp.go.jp

**Key words** Retrospective studies; overdose; emergency medical services; epidemiology

**Word count:** 2366 word

## ABSTRACT

**Objective:** To compare the clinical and procedural characteristics of emergency hospital admissions for drug poisoning and major diseases.

**Design:** Retrospective observational study.

**Setting:** Discharged patients from 855 acute care hospitals from 1 July to 31 December in 2008 in Japan.

**Results:** There were a total of 1 157 893 emergency hospital admissions. Among the top 100 causes, drug poisoning was ranked higher in terms of the percentage of patients using ambulance services (74.1%; 2nd) and tertiary emergency medical services (37.8%; 1st). Despite higher utilization of emergency care resources, drug poisoning ranked lower in terms of the median length of stay (2 days; 100th), percentage of requirement for surgical procedures (1.7%; 91st), and in-hospital mortality ratio (0.3%; 74th).

**Conclusion:** Drug poisoning is unique among the top 100 causes of emergency admissions. Our findings suggest that drug poisoning imposes a greater burden on emergency care resources but has a less severe clinical course than other causes of admissions. Future research should focus on strategies to reduce the burden of drug poisoning on emergency medical systems.

## Article Summary

### Article focus

■ Only a few multicenter studies have compared resource use and clinical course of emergency hospital admissions. Our aim was to compare the clinical and procedural characteristics of emergency hospital admissions for drug poisoning and major diseases by using a nationwide administrative discharge database.

### Key messages

■ Drug poisoning is in an anomalous position among the top 100 causes of emergency admissions.

■ Patients with drug poisoning had a less severe clinical course than those with other causes, although they had higher utilization of emergency care resources.

### Strengths and limitations of this study

■ A large data from a nationwide discharge database was studied.

■ Our results are limited to inpatient admissions to acute care hospitals.

## INTRODUCTION

A better understanding of epidemiology in emergency medical services (EMS) is important for planning EMS resource use and EMS personnel training needs.<sup>1</sup> Drug poisoning is a major cause of admissions to acute care hospitals and places a considerable burden on EMS resources. Drug poisoning accounts for over 15% of all admissions to intensive care units.<sup>2,3</sup> However, most cases of drug poisoning do not result in clinical toxicity. Of patients with drug poisoning admitted to an intensive care unit, 91% do not require advanced treatments.<sup>2</sup> Over 75% of patients admitted to emergency departments can be released from medical observation after a brief period (i.e., 1–2 days).<sup>4–6</sup> Less than 1% of cases result in mortality.<sup>7,8</sup> These previous studies suggest that drug poisoning may impose a needless burden on high-level EMS despite their limited requirements for advanced treatments.<sup>2,9</sup>

Although a number of studies have examined the detailed epidemiology of drug poisoning,<sup>2–8</sup> only a few multicenter studies have compared resource use and clinical course of emergency hospital admissions.<sup>10–12</sup> It remains unknown whether drug poisoning imposes a greater burden on emergency care resources and has a less severe clinical course among major causes of admissions. We thus aimed to compare the clinical and procedural characteristics of emergency hospital admissions for drug poisoning and major diseases by using a nationwide administrative discharge database.

## METHODS

### Data source

We conducted an observational study using the nationwide discharge administrative database of the Diagnosis Procedure Combination/Per-Diem Payment System (DPC/PDPS), a Japanese case-mix classification system launched in 2002 by the Ministry of Health, Labour and Welfare of Japan.<sup>13</sup> Every year, the DPC Research Group conducts a survey of DPC/PDPS hospitals. In 2008, 855 of 1 558 DPC/PDPS hospitals voluntarily participated in the survey. The DPC/PDPS database includes clinical and procedural information on *all* inpatients discharged from the participating hospitals between 1 July and 31 December. All the data for each patient were recorded at discharge. The database includes 2.86 million admissions, representing approximately 40% of all inpatient admissions to acute care hospitals in Japan (excluding psychiatric and tuberculosis hospitals).<sup>14</sup> In the present study, we included all emergency hospital admissions and excluded planned admissions to the DPC/PDPS hospitals.

### Setting

In Japan, the EMS system is divided into 3 categories:<sup>15</sup> (1) primary EMS that provides care to patients who can be discharged without hospitalization; (2) secondary EMS that provides care to patients who require admission to a regular inpatient bed; and (3) tertiary EMS that provides care to severely ill and trauma patients who require intensive care. In 2008, there were 18 892 clinics and 963 hospitals for primary EMS, 3 053 hospitals for secondary EMS, and 214 hospitals for tertiary EMS.<sup>14</sup> In the present study, we focused on secondary and tertiary EMS rather than primary EMS, because the DPC/PDPS database is an inpatient database. Among the 855 participating hospitals in the DPC/PDPS database, 725 provide only secondary EMS and the



1  
2  
3 other 130 provide tertiary EMS. Although some of the participating hospitals also provide  
4  
5 primary EMS, data on emergency outpatient admissions are not included in the database.  
6  
7

## 8 9 **Clinical and procedural characteristics**

10  
11  
12 To describe clinical and procedural characteristics of emergency hospital admissions, we  
13 used the following study variables: (1) age; (2) gender; (3) major disease categories; (4)  
14 comorbidities at admissions; (5) level of consciousness assessed by the Japan Coma Scale  
15 (JCS);<sup>16</sup> (6) use of ambulance service; (7) use of tertiary EMS; (8) requirement for surgical  
16 procedures that include both major surgery and suturing in an emergency department; (9) length  
17 of stay (days); and (10) in-hospital mortality.  
18  
19  
20  
21  
22  
23  
24  
25

26  
27 Physicians recorded information on diagnoses using the International Classification of  
28 Diseases 10th revision (ICD-10) codes. According to the ICD-10 codes, 506 major disease  
29 categories were defined in 2008 (see Supplemental Table). In the database, patients with drug,  
30 chemical, and unspecified poisoning (ICD-10 codes T360–T509, T510–T659, and T887,  
31 respectively) have the same major disease code (disease code 161070). In the present study, we  
32 modified the disease code to separate drug poisoning (modified disease code 161070a) from  
33 chemical and unspecified poisoning (modified disease code 161070b) according to their ICD-10  
34 codes.  
35  
36  
37  
38  
39  
40  
41  
42  
43  
44

45  
46 In the database, up to 4 diagnosed comorbidities per patient were recorded. Using the criteria  
47 developed by the Global Burden of Disease study with some modifications,<sup>17</sup> we defined  
48 comorbid status of mental illness as being diagnosed with any of the following ICD-10 codes:  
49 unipolar depressive disorders (F32–F33); bipolar affective disorder (F30–F31); schizophrenia  
50 (F20–F29); alcohol use disorders (F10); drug use disorders (F11–F16 and F18–F19);  
51 post-traumatic stress disorder (F431); obsessive-compulsive disorder (F42); panic disorder (F400)  
52  
53  
54  
55  
56  
57  
58  
59  
60

1  
2  
3 and F410); or insomnia (F51).  
4  
5

## 6 7 **Statistical analyses**

8  
9  
10 First, we conducted univariate analyses to summarize the clinical and procedural  
11 characteristics of all emergency admissions. Second, we selected patients diagnosed with one of  
12 the top 100 major disease codes and calculated summary statistics of 8 variables by disease code.  
13 These variables were as follows: (1) percentage of patients aged 65 years or older; (2) percentage  
14 of patients comorbid with mental illness; (3) percentage of patients admitted to hospitals with  
15 deep coma (JCS scores  $\geq 100$ , corresponding to scores of  $\leq 7$  on the Glasgow Coma  
16 Scale);<sup>16</sup> (4) percentage of patients using ambulance services; (5) percentage of patients using  
17 tertiary EMS; (6) percentage of patients requiring surgical procedures; (7) median length of stay;  
18 and (8) percentage of in-hospital mortality. To maximize interpretability, we restricted this  
19 analysis to patients with one of the top 100 causes of admissions. We used a predictive principal  
20 component analysis (PCA) biplot to reduce the dimensionality of multivariate data (i.e., 100  
21 causes of admissions  $\times$  8 variables) and then to visualize 2 dimensions with minimal loss of  
22 information.<sup>18</sup> Before conducting the predictive PCA biplot, we standardized each variable with  
23 a mean of 0 and a standard deviation of 1 because the measurement units of 8 variables were  
24 incommensurable. In the predictive PCA biplot, the 8 variables were represented by 8 biplot axes  
25 to read off predictive values of the variables for each of the top 100 causes. All statistical  
26 analyses were performed with R version 2.4.1.<sup>19</sup> The predictive PCA biplot was performed  
27 using the BiplotGUI package under R.<sup>19</sup>  
28  
29  
30  
31  
32  
33  
34  
35  
36  
37  
38  
39  
40  
41  
42  
43  
44  
45  
46  
47  
48  
49  
50  
51  
52  
53  
54  
55  
56  
57  
58  
59  
60

## RESULTS

### Characteristics of all emergency hospital admissions

During the study period, there were a total of 1 157 893 emergency hospital admissions to 855 hospitals. Characteristics of these admissions are presented in Table 1. The majority (51.7%) of admissions were for patients aged  $\geq 65$  years. Patients aged 0–14 years accounted for less than one-sixth (15.3%) of the admissions. The most prevalent diagnosis was pneumonia, accounting for 10.2% of all admissions, followed by stroke (5.5%) and heart failure (2.8%). Drug poisoning ranked 41st among causes of admissions. Less than 5% of patients used tertiary EMS. Of those patients, 88.3% stayed for more than 3 days. About 7% of patients died during hospitalization.

-----  
Insert Table 1 here  
-----

### Comparison of drug poisoning and major diseases

The top 100 causes of admissions covered 83% (965 749 admissions) of all admissions. Characteristics by cause of admission are shown in Table 2 for the top 10 causes and drug poisoning; the top 100 causes are also shown in Supplemental Table. The predictive PCA biplot with 2 dimensions accounts for 62.9% of the variance in the data from the top 100 causes. The predictive PCA biplot revealed that drug poisoning was in a unique position (Figure 1). Among the top 100 causes, patients with drug poisoning were less likely to be aged  $\geq 65$  years (13.4%; 86th) and most likely to be diagnosed with mental illness (33.7%; 1st). In addition, patients with drug poisoning were more likely to be admitted to hospitals with deep coma (26.2%; 2nd), more likely to use ambulance services (74.1%; 2nd), and most likely to use tertiary EMS (37.8%; 1st).

1  
2  
3 Despite the higher utilization of emergency care resources, clinical course of drug poisoning was  
4  
5 less severe. Among the top 100 causes, patients with drug poisoning had the shortest median  
6  
7 length of stay (2 days; 100th), were less likely to require surgical procedures (1.7%; 91st), and  
8  
9 were less likely to die during hospitalization (0.3%; 74th).  
10  
11

12  
13 In terms of the percentage of patients admitted to tertiary EMS, subarachnoid haemorrhage  
14  
15 and ruptured cerebral aneurysm (disease code 010020) ranked second (30.3%; 2nd; see the 46th  
16  
17 row in Supplemental Table). Patients with subarachnoid haemorrhage and ruptured cerebral  
18  
19 aneurysm were most likely to be admitted to hospitals with deep coma (33.9%; 1st) and most  
20  
21 likely to use ambulance services (76.0%; 1st). They had a longer median length of stay (28 days;  
22  
23 4th), were more likely to require surgical procedures (73.2%; 11st), and were more likely to die  
24  
25 during hospitalization (26.9%; 9th).  
26  
27  
28  
29  
30  
31

32 -----  
33  
34 Insert Table 2 and Figure 1 here  
35  
36 -----  
37  
38  
39  
40  
41  
42  
43  
44  
45  
46  
47  
48  
49  
50  
51  
52  
53  
54  
55  
56  
57  
58  
59  
60

## DISCUSSION

To our knowledge, this is the first study that used a nationwide administrative discharge database to compare detailed clinical and procedural characteristics of emergency hospital admissions for drug poisoning and major diseases. We found that drug poisoning was unique among the top 100 causes of emergency admissions. Patients with drug poisoning had a less severe clinical course than those with other causes, although they had higher utilization of emergency care resources. Our findings suggest that drug poisoning imposes a higher burden on emergency care resources than other causes of emergency admissions.

Our results are consistent with those of a case-control study conducted in Australia and New Zealand.<sup>10</sup> That study found that the median length of stay in patients with drug poisoning was 3 days, which was much lower than the overall median length of stay (9 days) in patients with 1 of the 8 most common diagnoses in a tertiary intensive care unit. One possible explanation for the potential over-utilization of high-level EMS resources is that staff with significant experience in psychosocial assessment might be more available in high-level EMS facilities. In Japan, 85% of tertiary EMS hospitals have psychiatric departments, while 23% of secondary EMS hospitals are so equipped.<sup>14</sup> Because most patients with drug poisoning have attempted suicide,<sup>20</sup> and self-harm patients should receive a specialist psychosocial assessment according to the clinical guideline,<sup>21</sup> patients with drug poisoning are transferred to high-level EMS in which mental health specialists are more available.

Another explanation for the potential over-utilization may relate to difficulties that confront ambulance officers. First, staff in secondary EMS hospitals might decline to manage patients with drug poisoning. A survey conducted in Osaka city revealed that ambulance officers contacted more hospitals to transport patients with drug poisoning than all patients (average

1  
2  
3 number of contacted hospitals: 7.6 vs. 1.8, respectively).<sup>22</sup> Second, ambulance officers might  
4 transport patients with drug poisoning to high-level EMS because of their deep coma. Drug  
5 poisoning ranked within the top 2 in terms of the percentage of patients with deep coma and  
6 percentage of patients admitted to tertiary EMS. However, patients with drug poisoning had a  
7 less severe clinical course than those with other causes. For example, in terms of the percentage  
8 of patients admitted to tertiary EMS, drug poisoning ranked first, followed by subarachnoid  
9 haemorrhage and ruptured cerebral aneurysm, which had a much more severe clinical course  
10 than drug poisoning. It would be of great value to investigate triage tools predicting the need for  
11 advanced treatments based on information not only from early admission factors,<sup>23</sup> but also  
12 from pre-hospital factors.<sup>24</sup>

13  
14  
15  
16  
17  
18  
19  
20  
21  
22  
23  
24  
25  
26  
27 Our study has several limitations. First, our results cannot be generalized and are limited to  
28 inpatient admissions to acute care hospitals rather than emergency outpatient admissions or  
29 emergency admissions to psychiatric hospitals, because we used the DPC/PDPS database.  
30  
31  
32  
33  
34  
35  
36  
37  
38  
39  
40  
41  
42  
43  
44  
45  
46  
47  
48  
49  
50  
51  
52  
53  
54  
55  
56  
57  
58  
59  
60

Second, we were unable to evaluate variables not included in the DPC/PDPS database. As a result, we could not assess other potentially important factors predicting the need for advanced treatments, such as acute physiology and chronic health evaluation (APACHE) scores at admission<sup>23</sup> or clinical management and course during pre-hospital period.<sup>24</sup> Third, we included all types of drug poisoning (i.e., deliberate, accidental, and undetermined intent) as in a previous study,<sup>7</sup> because data on external causes (ICD-10 codes V01–Y98) are not recorded in the DPC/PDPS database. As a result, we could not distinguish between deliberate and accidental drug poisoning. Fourth, although the database included approximately 40% of all inpatient admissions in Japan, participation in the survey was voluntary for each hospital and the patient selection procedure was not based on a random sampling technique from all acute hospitals.

1  
2  
3 In conclusion, we have demonstrated that drug poisoning is unique among the top 100 causes  
4 of emergency admissions. Future research should focus on strategies to reduce the burden of  
5  
6 drug poisoning on emergency medical systems.  
7  
8  
9  
10  
11  
12  
13  
14  
15  
16  
17  
18  
19  
20  
21  
22  
23  
24  
25  
26  
27  
28  
29  
30  
31  
32  
33  
34  
35  
36  
37  
38  
39  
40  
41  
42  
43  
44  
45  
46  
47  
48  
49  
50  
51  
52  
53  
54  
55  
56  
57  
58  
59  
60

For peer review only

## Acknowledgements

The authors would like to thank Dr. Toshie Noda for her feedbacks on an earlier draft of this article.

## Funding

Funding for administrating the study was supported by Grants-in-Aid for Research on Policy Planning and Evaluation (Japanese Ministry of Health, Labour and Welfare H22-SEISAKU-SITEI-031 and H24-SEISAKU-SITEI-012). Funding for writing this article was supported by a Health Labour Sciences Research Grant (H22-IYAKU-IPPAN-013) from the Ministry of Health, Labour and Welfare of Japan.

## Competing Interest

None.

## Ethic approval

The study protocol was approved by the institutional review board of the University of Occupational and Environmental Health, Fukuoka, Japan.

## Contributors

SM, KBI, and KF conducted data collection, data synthesis, and data management. KF and HI obtained funding. YO participated in study concept and design, analysis and interpretation of data, drafting of the manuscript, and critical revision of the manuscript. SS supervised data analysis. SS, KBI, KF, and HI participated in interpretation of data and critical revision of the



1  
2  
3 manuscript for important intellectual content. All authors contributed to and approved the final  
4  
5 manuscript.  
6  
7

### 8 9 **Provenance and peer review**

10  
11 Not commissioned; externally peer reviewed.  
12  
13

### 14 15 **Data sharing information**

16  
17 No additional data are available.  
18  
19  
20  
21  
22  
23  
24  
25  
26  
27  
28  
29  
30  
31  
32  
33  
34  
35  
36  
37  
38  
39  
40  
41  
42  
43  
44  
45  
46  
47  
48  
49  
50  
51  
52  
53  
54  
55  
56  
57  
58  
59  
60

## References

1. Platts-Mills TF, Leacock B, Cabanas JG, *et al.* Emergency medical services use by the elderly: analysis of a statewide database. *Prehosp Emerg Care* 2010;**14**:329-33.
2. Schwake L, Wollenschlager I, Stremmel W, *et al.* Adverse drug reactions and deliberate self-poisoning as cause of admission to the intensive care unit: a 1-year prospective observational cohort study. *Intensive Care Med* 2009;**35**:266-74.
3. McGrath J. A survey of deliberate self-poisoning. *Med J Aust* 1989;**150**:317-8, 320-1, 324.
4. Henderson A, Wright M, Pond SM. Experience with 732 acute overdose patients admitted to an intensive care unit over six years. *Med J Aust* 1993;**158**:28-30.
5. Hendrix L, Verelst S, Desruelles D, *et al.* Deliberate self-poisoning: characteristics of patients and impact on the emergency department of a large university hospital. *Emerg Med J* 2012.
6. Hollander JE, McCracken G, Johnson S, *et al.* Emergency department observation of poisoned patients: how long is necessary? *Acad Emerg Med* 1999;**6**:887-94.
7. Heyerdahl F, Bjornaas MA, Dahl R, *et al.* Repetition of acute poisoning in Oslo: 1-year prospective study. *Br J Psychiatry* 2009;**194**:73-9.
8. Xiang Y, Zhao W, Xiang H, *et al.* ED visits for drug-related poisoning in the United States, 2007. *Am J Emerg Med* 2011;**30**:293-301.
9. Hamad AE, Al-Ghadban A, Carvounis CP, *et al.* Predicting the need for medical intensive care monitoring in drug-overdosed patients. *J Intensive Care Med* 2000;**15**:321-328.
10. Flabouris A, Hart GK, George C. Outcomes of patients admitted to tertiary intensive care units after interhospital transfer: comparison with patients admitted from emergency departments. *Crit Care Resusc* 2008;**10**:97-105.

- 1  
2  
3 11. Spiller HA, Singleton MD. Comparison of incidence of hospital utilization for poisoning and  
4  
5 other injury types. *Public Health Rep* 2011;**126**:94-9.  
6  
7
- 8 12. Wadman MC, Muelleman RL, Coto JA, *et al*. The pyramid of injury: using ecodes to  
9  
10 accurately describe the burden of injury. *Ann Emerg Med* 2003;**42**:468-78.  
11  
12
- 13 13. Matsuda S, Ishikawa KB, Kuwabara K, *et al*. Development and use of the Japanese case-mix  
14  
15 system. *Eurohealth* 2008;**14**:25-30.  
16  
17
- 18 14. Statistics and Information Department, Minister's Secretariat, Ministry of Health, Labour and  
19  
20 Welfare. *2008 Summary of Static/Dynamic Surveys of Medical Institutions and Hospital*  
21  
22 *Report (in Japanese)*. Tokyo: Health and Welfare Statistics Association, 2010.  
23  
24
- 25 15. Japan International Cooperation Agency. Emergency medical care. *Japan's experiences in*  
26  
27 *public Health and medical systems: towards improving public health and medical systems in*  
28  
29 *developing countries*. Tokyo: Institute for International Cooperation, Japan International  
30  
31 Cooperation Agency, 2005:227-244.  
32  
33
- 34 16. Takeuchi E. Reliability of grading systems of impaired consciousness. Statistical evaluation  
35  
36 of inter-rater reliability and validity of the Japan coma scale (JCS) (in Japanese). *J Osaka*  
37  
38 *Medical College*, 1988:20-30.  
39  
40
- 41 17. World Health Organization. *The global burden of disease: 2004 update*: Author, 2004.  
42  
43
- 44 18. Gower J, Lubbe S, Roux NL. *Understanding biplots*: Wiley, 2011.  
45  
46
- 47 19. R Development Core Team. *R: A language and environment for statistical computing*. Vienna,  
48  
49 Austria: R Foundation for Statistical Computing, 2011.  
50  
51
- 52 20. Hirata K, Matsumoto Y, Tomioka J, *et al*. Acute drug poisoning at critical care departments in  
53  
54 Japan. *Jpn J Hosp Pharm* 1998;**24**:340-348.  
55  
56  
57  
58  
59  
60

- 1  
2  
3  
4  
5  
6  
7  
8  
9  
10  
11  
12  
13  
14  
15  
16  
17  
18  
19  
20  
21  
22  
23  
24  
25  
26  
27  
28  
29  
30  
31  
32  
33  
34  
35  
36  
37  
38  
39  
40  
41  
42  
43  
44  
45  
46  
47  
48  
49  
50  
51  
52  
53  
54  
55  
56  
57  
58  
59  
60
21. National Institute for Health and Clinical Excellence. *Self-harm: the short-term physical and psychological management and secondary prevention of self-harm in primary and secondary care*. Manchester: Author, 2004.
  22. Fire and Disaster Management Agency of the Ministry of Internal Affairs and Communications. *Reports on emergency medicine 2009* Tokyo, 2010.
  23. Eizadi Mood N, Sabzghabae AM, Khalili-Dehkordi Z. Applicability of different scoring systems in outcome prediction of patients with mixed drug poisoning-induced coma. *Indian J Anaesth* 2011;**55**:599-604.
  24. Gwini SM, Shaw D, Iqbal M, *et al*. Exploratory study of factors associated with adverse clinical features in patients presenting with non-fatal drug overdose/self-poisoning to the ambulance service. *Emerg Med J* 2011;**28**:892-4.

**Table 1** Characteristics of emergency hospital admissions

| Characteristic                                                                      | N of admissions | % of admissions | 95% CI    |
|-------------------------------------------------------------------------------------|-----------------|-----------------|-----------|
| Age                                                                                 |                 |                 |           |
| 0–14                                                                                | 177 092         | 15.3            | 15.2–15.4 |
| 15–64                                                                               | 382 025         | 33.0            | 32.9–33.1 |
| ≥ 65                                                                                | 598 776         | 51.7            | 51.6–51.8 |
| Gender women                                                                        | 547 280         | 47.3            | 47.2–47.3 |
| Top 10 causes of admissions and drug poisoning (Disease code)                       |                 |                 |           |
| 1. Pneumonia, acute bronchitis, acute bronchiolitis (040080)                        | 117 649         | 10.2            | 10.1–10.2 |
| 2. Stroke (010060)                                                                  | 63 931          | 5.5             | 5.5–5.6   |
| 3. Heart failure (050130)                                                           | 32 993          | 2.8             | 2.8–2.9   |
| 4. Intestinal obstruction without hernia (060210)                                   | 28 701          | 2.5             | 2.5–2.5   |
| 5. Fracture of proximal femur (160800)                                              | 25 905          | 2.2             | 2.2–2.3   |
| 6. Viral enteritis (150010)                                                         | 24 920          | 2.2             | 2.1–2.2   |
| 7. Asthma (040100)                                                                  | 23 858          | 2.1             | 2.0–2.1   |
| 8. Angina pectoris, chronic ischemic heart disease (050050)                         | 20 775          | 1.8             | 1.8–1.8   |
| 9. Disorder associated with shortened gestation period or low birth weight (140010) | 20 540          | 1.8             | 1.8–1.8   |
| 10. Renal infection (110310)                                                        | 19 853          | 1.7             | 1.7–1.7   |
| 41. Drug poisoning (161070a)                                                        | 6 748           | 0.6             | 0.6–0.6   |
| Other causes                                                                        | 769 326         | 66.4            | 66.4–66.5 |
| Comorbid mental illness                                                             | 23 279          | 2.0             | 2.0–2.0   |
| Deep coma                                                                           | 26 792          | 2.3             | 2.3–2.3   |
| Ambulance services                                                                  | 311 333         | 26.9            | 26.8–27.0 |
| Tertiary EMS                                                                        | 54 938          | 4.7             | 4.7–4.8   |
| Surgical procedures                                                                 | 321 974         | 27.8            | 27.7–27.9 |
| Length of stay (days)                                                               |                 |                 |           |
| ≤ 3                                                                                 | 135 096         | 11.7            | 11.6–11.7 |
| 4–7                                                                                 | 266 651         | 23.0            | 23.0–23.1 |
| 8–14                                                                                | 296 549         | 25.6            | 25.5–25.7 |
| 15–30                                                                               | 258 717         | 22.3            | 22.3–22.4 |
| 31–60                                                                               | 136 014         | 11.7            | 11.7–11.8 |
| ≥ 60                                                                                | 64 866          | 5.6             | 5.6–5.6   |
| Death during hospitalization                                                        | 78 226          | 6.8             | 6.7–6.8   |

Comorbidity of mental illness was defined as the following ICD-10 codes as comorbidities: unipolar depressive disorders (F32–F33), bipolar affective disorder (F30–F31), schizophrenia (F20–F29), alcohol use disorders (F10), drug use disorders (F11–F16 and F18–F19), post-traumatic stress disorder (F431), obsessive-compulsive disorder (F42), panic disorder (F400 and F410), or insomnia (F51). Deep coma was defined as a score on the Japan Soma Scale of 100 or more.

EMS, emergency medical services.

**Table 2** Characteristics of poisoning and other causes of admissions

| Rank | Top 10 causes of admissions and drug poisoning (Disease code)                    | ICD-10 codes                                                                                                                                                                                                                                                                                                                                                                                             | N       | %    | Clinical and procedural characteristics, %/median, (rank) |                 |           |           |          |           |           | Mortality |
|------|----------------------------------------------------------------------------------|----------------------------------------------------------------------------------------------------------------------------------------------------------------------------------------------------------------------------------------------------------------------------------------------------------------------------------------------------------------------------------------------------------|---------|------|-----------------------------------------------------------|-----------------|-----------|-----------|----------|-----------|-----------|-----------|
|      |                                                                                  |                                                                                                                                                                                                                                                                                                                                                                                                          |         |      | Age ≥ 65                                                  | Comorbid Mental | Deep Coma | Ambulance | Tertiary | Surgery   | LOS       |           |
| 1    | Pneumonia, acute bronchitis, acute bronchiolitis (040080)                        | A370, A378, A379, A481, B012, B052, B371, B59, J13, J14, J15*, J16*, J17*, J18*, J20*, J21*, J22, J69*                                                                                                                                                                                                                                                                                                   | 117 649 | 10.2 | 48.7 (57)                                                 | 1.5 (53)        | 2.2 (23)  | 19.3 (53) | 2.2 (43) | 5.7 (82)  | 9.0 (62)  | 7.9 (29)  |
| 2    | Stroke (010060)                                                                  | G45*, G46*, I63*, I65*, I66*, I675, I679, I693, I978                                                                                                                                                                                                                                                                                                                                                     | 63 931  | 5.5  | 77.8 (11)                                                 | 1.5 (53)        | 4.0 (14)  | 44.1 (21) | 8.0 (21) | 8.0 (77)  | 17.0 (30) | 5.2 (35)  |
| 3    | Heart failure (050130)                                                           | I50*                                                                                                                                                                                                                                                                                                                                                                                                     | 32 993  | 2.8  | 86.0 (4)                                                  | 1.3 (60)        | 1.6 (26)  | 34.3 (27) | 9.3 (19) | 11.5 (67) | 18.0 (27) | 11.1 (24) |
| 4    | Intestinal obstruction without hernia (060210)                                   | K560, K562, K563, K564, K565, K566, K567, K913                                                                                                                                                                                                                                                                                                                                                           | 28 701  | 2.5  | 64.3 (33)                                                 | 1.9 (40)        | 0.2 (68)  | 18.1 (59) | 2.0 (48) | 19.3 (57) | 11.0 (51) | 2.4 (48)  |
| 5    | Fracture of proximal femur (160800)                                              | M2435, M2445, S7200, S7210, S7220, S7230, S7270, S7280, S7290, S730                                                                                                                                                                                                                                                                                                                                      | 25 905  | 2.2  | 90.6 (1)                                                  | 3.7 (9)         | 0.1 (75)  | 49.5 (14) | 1.5 (58) | 91.0 (5)  | 30.0 (2)  | 1.4 (58)  |
| 6    | Viral enteritis (150010)                                                         | A08*, A09                                                                                                                                                                                                                                                                                                                                                                                                | 24 920  | 2.2  | 23.4 (80)                                                 | 0.9 (73)        | 0.1 (75)  | 14.9 (67) | 0.3 (87) | 0.8 (95)  | 5.0 (89)  | 0.2 (79)  |
| 7    | Asthma (040100)                                                                  | J45*, J46                                                                                                                                                                                                                                                                                                                                                                                                | 23 858  | 2.1  | 12.0 (87)                                                 | 0.8 (76)        | 0.4 (52)  | 9.5 (85)  | 1.2 (64) | 0.5 (97)  | 6.0 (82)  | 0.3 (74)  |
| 8    | Angina pectoris, chronic ischemic heart disease (050050)                         | I20*, I25*                                                                                                                                                                                                                                                                                                                                                                                               | 20 775  | 1.8  | 68.2 (23)                                                 | 0.9 (73)        | 0.4 (52)  | 31.9 (31) | 7.7 (22) | 43.7 (29) | 7.0 (78)  | 0.8 (64)  |
| 9    | Disorder associated with shortened gestation period or low birth weight (140010) | P00*, P01*, P02*, P03*, P04*, P05*, P07*, P08*, P10*, P11*, P12*, P13*, P15*, P20*, P21*, P22*, P23*, P24*, P25*, P26*, P27*, P28*, P29*, P35*, P36*, P37*, P38, P39*, P50*, P51*, P52*, P53, P54*, P55*, P56*, P57*, P58*, P590, P591, P592, P593, P598, P599, P60, P61*, P70*, P71*, P72*, P74*, P75, P76*, P77, P780, P781, P782, P783, P789, P80*, P81*, P83*, P90, P91*, P92*, P93, P94*, P95, P96* | 20 540  | 1.8  | 0.0 (95)                                                  | 0.0 (98)        | 0.4 (52)  | 9.4 (86)  | 0.0 (97) | 10.5 (71) | 8.0 (70)  | 0.5 (69)  |
| 10   | Renal infection (110310)                                                         | N10, N151, N390                                                                                                                                                                                                                                                                                                                                                                                          | 19 853  | 1.7  | 63.7 (34)                                                 | 1.7 (44)        | 1.1 (32)  | 22.5 (47) | 1.3 (63) | 6.7 (80)  | 10.0 (55) | 1.5 (56)  |
| 41   | Drug poisoning (161070a)                                                         | T36*, T37*, T38*, T39*, T40*, T41*, T42*, T43*, T44*, T45*                                                                                                                                                                                                                                                                                                                                               | 6 748   | 0.6  | 13.4 (86)                                                 | 33.7 (1)        | 26.2 (2)  | 74.1 (2)  | 37.8 (1) | 1.7 (91)  | 2.0 (100) | 0.3 (74)  |

Rankings were based on data from the top 100 causes of admissions. Comorbidity of mental illness was defined as the following ICD-10 codes as comorbidities: unipolar depressive disorders (F32–F33), bipolar affective disorder (F30–F31), schizophrenia (F20–F29), alcohol use disorders (F10), drug use disorders (F11–F16 and F18–F19), post-traumatic stress disorder (F431), obsessive-compulsive disorder (F42), panic disorder (F400 and F410), or insomnia (F51). Deep coma was defined as a score on the Japan Soma Scale of 100 or more. Ambulance, ambulance services; LOS, median length of stay; Mortality, in-hospital mortality; Surgery, surgical procedures; Tertiary, tertiary emergency medical services; \*, wild card.

1  
2  
3  
4  
5  
6  
7  
8  
9  
10  
11  
12  
13  
14  
15  
16  
17  
18  
19  
20  
21  
22  
23  
24  
25  
26  
27  
28  
29  
30  
31  
32  
33  
34  
35  
36  
37  
38  
39  
40  
41  
42  
43  
44  
45  
46  
47  
48  
49  
50  
51  
52  
53  
54  
55  
56  
57  
58  
59  
60

## Comparison of emergency hospital admissions for drug poisoning and major diseases: a retrospective observational study using a nationwide administrative discharge database

Yasuyuki Okumura,<sup>1</sup> Sayuri Shimizu,<sup>2</sup> Koichi B. Ishikawa,<sup>3</sup> Shinya Matsuda,<sup>4</sup> Kiyohide Fushimi,<sup>5</sup> Hiroto Ito<sup>1</sup>

<sup>1</sup> Department of Social Psychiatry, National Institute of Mental Health, National Center of Neurology and Psychiatry, Tokyo 187-8553, Japan

<sup>2</sup> Research Department, Institute for Health Economics and Policy, Tokyo105-0003, Japan

<sup>3</sup> Statistics and Cancer Control Division, National Cancer Center, Tokyo 104-0045, Japan

<sup>4</sup> Department of Preventive Medicine and Community Health, University of Occupational and Environmental Health, Kitakyushu 807-8555, Japan

<sup>5</sup> Department of Health Policy and Informatics, Tokyo Medical and Dental University Graduate School of Medicine, Tokyo 113-8510, Japan

**Correspondence to** Yasuyuki Okumura, Department of Social Psychiatry, National Institute of Mental Health, National Center of Neurology and Psychiatry, 4-1-1 Ogawa-Higashi cho, Kodaira 187-8553, Tokyo, Japan; Tel.: + 81 42 346 2046; Fax: +81 42 346 2047; Email: yokumura@ncnp.go.jp

**Key words** Retrospective studies; overdose; emergency medical services; epidemiology

**Word count:** 2366 word

## ABSTRACT

**Objective:** To compare the clinical and procedural characteristics of emergency hospital admissions for drug poisoning and major diseases.

**Design:** Retrospective observational study.

**Setting:** Discharged patients from 855 acute care hospitals from 1 July to 31 December in 2008 in Japan.

**Results:** There were a total of 1 157 893 emergency hospital admissions. Among the top 100 causes, drug poisoning was ranked higher in terms of the percentage of patients using ambulance services (74.1%; 2nd) and tertiary emergency medical services (37.8%; 1st). Despite higher utilization of emergency care resources, drug poisoning ranked lower in terms of the median length of stay (2 days; 100th), percentage of requirement for surgical procedures (1.7%; 91st), and in-hospital mortality ratio (0.3%; 74th).

**Conclusion:** Drug poisoning is unique among the top 100 causes of emergency admissions. Our findings suggest that drug poisoning imposes a greater burden on emergency care resources but has a less severe clinical course than other causes of admissions. Future research should focus on strategies to reduce the burden of drug poisoning on emergency medical systems.



## Article Summary

### Article focus

■ Only a few multicenter studies have compared resource use and clinical course of emergency hospital admissions. Our aim was to compare the clinical and procedural characteristics of emergency hospital admissions for drug poisoning and major diseases by using a nationwide administrative discharge database.

### Key messages

■ Drug poisoning is in an anomalous position among the top 100 causes of emergency admissions.

■ Patients with drug poisoning had a less severe clinical course than those with other causes, although they had higher utilization of emergency care resources.

### Strengths and limitations of this study

■ A large data from a nationwide discharge database was studied.

■ Our results are limited to inpatient admissions to acute care hospitals.

## INTRODUCTION

A better understanding of epidemiology in emergency medical services (EMS) is important for planning EMS resource use and EMS personnel training needs.<sup>1</sup> Drug poisoning is a major cause of admissions to acute care hospitals and places a considerable burden on EMS resources. Drug poisoning accounts for over 15% of all admissions to intensive care units.<sup>2,3</sup> However, most cases of drug poisoning do not result in clinical toxicity. Of patients with drug poisoning admitted to an intensive care unit, 91% do not require advanced treatments.<sup>2</sup> Over 75% of patients admitted to emergency departments can be released from medical observation after a brief period (i.e., 1–2 days).<sup>4-6</sup> Less than 1% of cases result in mortality.<sup>7,8</sup> These previous studies suggest that drug poisoning may impose a needless burden on high-level EMS despite their limited requirements for advanced treatments.<sup>2,9</sup>

Although a number of studies have examined the detailed epidemiology of drug poisoning,<sup>2-8</sup> only a few multicenter studies have compared resource use and clinical course of emergency hospital admissions.<sup>10-12</sup> It remains unknown whether drug poisoning imposes a greater burden on emergency care resources and has a less severe clinical course among major causes of admissions. We thus aimed to compare the clinical and procedural characteristics of emergency hospital admissions for drug poisoning and major diseases by using a nationwide administrative discharge database.

## METHODS

### Data source

We conducted an observational study using the nationwide discharge administrative database of the Diagnosis Procedure Combination/Per-Diem Payment System (DPC/PDPS), a Japanese case-mix classification system launched in 2002 by the Ministry of Health, Labour and Welfare of Japan.<sup>13</sup> Every year, the DPC Research Group conducts a survey of DPC/PDPS hospitals. In 2008, 855 of 1 558 DPC/PDPS hospitals voluntarily participated in the survey. The DPC/PDPS database includes clinical and procedural information on *all* inpatients discharged from the participating hospitals between 1 July and 31 December. All the data for each patient were recorded at discharge. The database includes 2.86 million admissions, representing approximately 40% of all inpatient admissions to acute care hospitals in Japan (excluding psychiatric and tuberculosis hospitals).<sup>14</sup> In the present study, we included all emergency hospital admissions and excluded planned admissions to the DPC/PDPS hospitals.

### Setting

In Japan, the EMS system is divided into 3 categories:<sup>15</sup> (1) primary EMS that provides care to patients who can be discharged without hospitalization; (2) secondary EMS that provides care to patients who require admission to a regular inpatient bed; and (3) tertiary EMS that provides care to severely ill and trauma patients who require intensive care. In 2008, there were 18 892 clinics and 963 hospitals for primary EMS, 3 053 hospitals for secondary EMS, and 214 hospitals for tertiary EMS.<sup>14</sup> In the present study, we focused on secondary and tertiary EMS rather than primary EMS, because the DPC/PDPS database is an inpatient database. Among the 855 participating hospitals in the DPC/PDPS database, 725 provide only secondary EMS and the

1  
2  
3 other 130 provide tertiary EMS. Although some of the participating hospitals also provide  
4  
5 primary EMS, data on emergency outpatient admissions are not included in the database.  
6  
7

## 8 9 **Clinical and procedural characteristics**

10  
11  
12 To describe clinical and procedural characteristics of emergency hospital admissions, we  
13 used the following study variables: (1) age; (2) gender; (3) major disease categories; (4)  
14 comorbidities at admissions; (5) level of consciousness assessed by the Japan Coma Scale  
15 (JCS);<sup>16</sup> (6) use of ambulance service; (7) use of tertiary EMS; (8) requirement for surgical  
16 procedures that include both major surgery and suturing in an emergency department; (9) length  
17 of stay (days); and (10) in-hospital mortality.  
18  
19  
20  
21  
22  
23  
24  
25

26  
27 Physicians recorded information on diagnoses using the International Classification of  
28 Diseases 10th revision (ICD-10) codes. According to the ICD-10 codes, 506 major disease  
29 categories were defined in 2008 (see Supplemental Table). In the database, patients with drug,  
30 chemical, and unspecified poisoning (ICD-10 codes T360–T509, T510–T659, and T887,  
31 respectively) have the same major disease code (disease code 161070). In the present study, we  
32 modified the disease code to separate drug poisoning (modified disease code 161070a) from  
33 chemical and unspecified poisoning (modified disease code 161070b) according to their ICD-10  
34 codes.  
35  
36  
37  
38  
39  
40  
41  
42  
43  
44

45  
46 In the database, up to 4 diagnosed comorbidities per patient were recorded. Using the criteria  
47 developed by the Global Burden of Disease study with some modifications,<sup>17</sup> we defined  
48 comorbid status of mental illness as being diagnosed with any of the following ICD-10 codes:  
49 unipolar depressive disorders (F32–F33); bipolar affective disorder (F30–F31); schizophrenia  
50 (F20–F29); alcohol use disorders (F10); drug use disorders (F11–F16 and F18–F19);  
51 post-traumatic stress disorder (F431); obsessive-compulsive disorder (F42); panic disorder (F400)  
52  
53  
54  
55  
56  
57  
58  
59  
60

1  
2  
3 and F410); or insomnia (F51).  
4  
5

## 6 7 **Statistical analyses** 8

9  
10 First, we conducted univariate analyses to summarize the clinical and procedural  
11 characteristics of all emergency admissions. Second, we selected patients diagnosed with one of  
12 the top 100 major disease codes and calculated summary statistics of 8 variables by disease code.  
13 These variables were as follows: (1) percentage of patients aged 65 years or older; (2) percentage  
14 of patients comorbid with mental illness; (3) percentage of patients admitted to hospitals with  
15 deep coma (JCS scores  $\geq 100$ , corresponding to scores of  $\leq 7$  on the Glasgow Coma  
16 Scale);<sup>16</sup> (4) percentage of patients using ambulance services; (5) percentage of patients using  
17 tertiary EMS; (6) percentage of patients requiring surgical procedures; (7) median length of stay;  
18 and (8) percentage of in-hospital mortality. To maximize interpretability, we restricted this  
19 analysis to patients with one of the top 100 causes of admissions. We used a predictive principal  
20 component analysis (PCA) biplot to reduce the dimensionality of multivariate data (i.e., 100  
21 causes of admissions  $\times$  8 variables) and then to visualize 2 dimensions with minimal loss of  
22 information.<sup>18</sup> Before conducting the predictive PCA biplot, we standardized each variable with  
23 a mean of 0 and a standard deviation of 1 because the measurement units of 8 variables were  
24 incommensurable. In the predictive PCA biplot, the 8 variables were represented by 8 biplot axes  
25 to read off predictive values of the variables for each of the top 100 causes. All statistical  
26 analyses were performed with R version 2.4.1.<sup>19</sup> The predictive PCA biplot was performed  
27 using the BiplotGUI package under R.<sup>19</sup>  
28  
29  
30  
31  
32  
33  
34  
35  
36  
37  
38  
39  
40  
41  
42  
43  
44  
45  
46  
47  
48  
49  
50  
51  
52  
53  
54  
55  
56  
57  
58  
59  
60

## RESULTS

### Characteristics of all emergency hospital admissions

During the study period, there were a total of 1 157 893 emergency hospital admissions to 855 hospitals. Characteristics of these admissions are presented in Table 1. The majority (51.7%) of admissions were for patients aged  $\geq 65$  years. Patients aged 0–14 years accounted for less than one-sixth (15.3%) of the admissions. The most prevalent diagnosis was pneumonia, accounting for 10.2% of all admissions, followed by stroke (5.5%) and heart failure (2.8%). Drug poisoning ranked 41st among causes of admissions. Less than 5% of patients used tertiary EMS. Of those patients, 88.3% stayed for more than 3 days. About 7% of patients died during hospitalization.

-----  
Insert Table 1 here  
-----

### Comparison of drug poisoning and major diseases

The top 100 causes of admissions covered 83% (965 749 admissions) of all admissions. Characteristics by cause of admission are shown in Table 2 for the top 10 causes and drug poisoning; the top 100 causes are also shown in Supplemental Table. The predictive PCA biplot with 2 dimensions accounts for 62.9% of the variance in the data from the top 100 causes. The predictive PCA biplot revealed that drug poisoning was in a unique position (Figure 1). Among the top 100 causes, patients with drug poisoning were less likely to be aged  $\geq 65$  years (13.4%; 86th) and most likely to be diagnosed with mental illness (33.7%; 1st). In addition, patients with drug poisoning were more likely to be admitted to hospitals with deep coma (26.2%; 2nd), more likely to use ambulance services (74.1%; 2nd), and most likely to use tertiary EMS (37.8%; 1st).

1  
2  
3 Despite the higher utilization of emergency care resources, clinical course of drug poisoning was  
4  
5 less severe. Among the top 100 causes, patients with drug poisoning had the shortest median  
6  
7 length of stay (2 days; 100th), were less likely to require surgical procedures (1.7%; 91st), and  
8  
9 were less likely to die during hospitalization (0.3%; 74th).  
10  
11

12  
13 In terms of the percentage of patients admitted to tertiary EMS, subarachnoid haemorrhage  
14  
15 and ruptured cerebral aneurysm (disease code 010020) ranked second (30.3%; 2nd; see the 46th  
16  
17 row in Supplemental Table). Patients with subarachnoid haemorrhage and ruptured cerebral  
18  
19 aneurysm were most likely to be admitted to hospitals with deep coma (33.9%; 1st) and most  
20  
21 likely to use ambulance services (76.0%; 1st). They had a longer median length of stay (28 days;  
22  
23 4th), were more likely to require surgical procedures (73.2%; 11st), and were more likely to die  
24  
25 during hospitalization (26.9%; 9th).  
26  
27  
28  
29  
30  
31

32 -----  
33  
34 Insert Table 2 and Figure 1 here  
35  
36 -----  
37  
38  
39  
40  
41  
42  
43  
44  
45  
46  
47  
48  
49  
50  
51  
52  
53  
54  
55  
56  
57  
58  
59  
60

## DISCUSSION

To our knowledge, this is the first study that used a nationwide administrative discharge database to compare detailed clinical and procedural characteristics of emergency hospital admissions for drug poisoning and major diseases. We found that drug poisoning was unique among the top 100 causes of emergency admissions. Patients with drug poisoning had a less severe clinical course than those with other causes, although they had higher utilization of emergency care resources. Our findings suggest that drug poisoning imposes a higher burden on emergency care resources than other causes of emergency admissions.

Our results are consistent with those of a case-control study conducted in Australia and New Zealand.<sup>10</sup> That study found that the median length of stay in patients with drug poisoning was 3 days, which was much lower than the overall median length of stay (9 days) in patients with 1 of the 8 most common diagnoses in a tertiary intensive care unit. One possible explanation for the potential over-utilization of high-level EMS resources is that staff with significant experience in psychosocial assessment might be more available in high-level EMS facilities. In Japan, 85% of tertiary EMS hospitals have psychiatric departments, while 23% of secondary EMS hospitals are so equipped.<sup>14</sup> Because most patients with drug poisoning have attempted suicide,<sup>20</sup> and self-harm patients should receive a specialist psychosocial assessment according to the clinical guideline,<sup>21</sup> patients with drug poisoning are transferred to high-level EMS in which mental health specialists are more available.

Another explanation for the potential over-utilization may relate to difficulties that confront ambulance officers. First, staff in secondary EMS hospitals might decline to manage patients with drug poisoning. A survey conducted in Osaka city revealed that ambulance officers contacted more hospitals to transport patients with drug poisoning than all patients (average



1  
2  
3 number of contacted hospitals: 7.6 vs. 1.8, respectively).<sup>22</sup> Second, ambulance officers might  
4 transport patients with drug poisoning to high-level EMS because of their deep coma. Drug  
5 poisoning ranked within the top 2 in terms of the percentage of patients with deep coma and  
6 percentage of patients admitted to tertiary EMS. However, patients with drug poisoning had a  
7 less severe clinical course than those with other causes. For example, *in terms of the percentage  
8 of patients admitted to tertiary EMS, drug poisoning ranked first, followed by subarachnoid  
9 haemorrhage and ruptured cerebral aneurysm, which had a much more severe clinical course  
10 than drug poisoning.* It would be of great value to investigate triage tools predicting the need for  
11 advanced treatments based on information not only from early admission factors,<sup>23</sup> but also  
12 from pre-hospital factors.<sup>24</sup>

13  
14  
15  
16  
17  
18  
19  
20  
21  
22  
23  
24  
25  
26  
27 Our study has several limitations. First, our results cannot be generalized and are limited to  
28 inpatient admissions to acute care hospitals rather than emergency outpatient admissions or  
29 emergency admissions to psychiatric hospitals, because we used the DPC/PDPS database.  
30  
31  
32  
33  
34  
35  
36  
37  
38  
39  
40  
41  
42  
43  
44  
45  
46  
47  
48  
49  
50  
51  
52  
53  
54  
55  
56  
57  
58  
59  
60

Our study has several limitations. First, our results cannot be generalized and are limited to inpatient admissions to acute care hospitals rather than emergency outpatient admissions or emergency admissions to psychiatric hospitals, because we used the DPC/PDPS database. Second, we were unable to evaluate variables not included in the DPC/PDPS database. As a result, we could not assess other potentially important factors predicting the need for advanced treatments, such as acute physiology and chronic health evaluation (APACHE) scores at admission<sup>23</sup> or clinical management and course during pre-hospital period.<sup>24</sup> Third, we included all types of drug poisoning (i.e., deliberate, accidental, and undetermined intent) as in a previous study,<sup>7</sup> because data on external causes (ICD-10 codes V01–Y98) are not recorded in the DPC/PDPS database. As a result, we could not distinguish between deliberate and accidental drug poisoning. Fourth, although the database included approximately 40% of all inpatient admissions in Japan, participation in the survey was voluntary for each hospital and the patient selection procedure was not based on a random sampling technique from all acute hospitals.

1  
2  
3 In conclusion, we have demonstrated that drug poisoning is unique among the top 100 causes  
4 of emergency admissions. Future research should focus on strategies to reduce the burden of  
5  
6  
7  
8 drug poisoning on emergency medical systems.  
9  
10  
11  
12  
13  
14  
15  
16  
17  
18  
19  
20  
21  
22  
23  
24  
25  
26  
27  
28  
29  
30  
31  
32  
33  
34  
35  
36  
37  
38  
39  
40  
41  
42  
43  
44  
45  
46  
47  
48  
49  
50  
51  
52  
53  
54  
55  
56  
57  
58  
59  
60

For peer review only

## Acknowledgements

The authors would like to thank Dr. Toshie Noda for her feedbacks on an earlier draft of this article.

## Funding

Funding for administrating the study was supported by Grants-in-Aid for Research on Policy Planning and Evaluation (Japanese Ministry of Health, Labour and Welfare H22-SEISAKU-SITEI-031 and H24-SEISAKU-SITEI-012). Funding for writing this article was supported by a Health Labour Sciences Research Grant (H22-IYAKU-IPPAN-013) from the Ministry of Health, Labour and Welfare of Japan.

## Competing Interest

None.

## Ethic approval

The study protocol was approved by the institutional review board of the University of Occupational and Environmental Health, Fukuoka, Japan.

## Contributors

SM, KBI, and KF conducted data collection, data synthesis, and data management. KF and HI obtained funding. YO participated in study concept and design, analysis and interpretation of data, drafting of the manuscript, and critical revision of the manuscript. SS supervised data analysis. SS, KBI, KF, and HI participated in interpretation of data and critical revision of the

1  
2  
3 manuscript for important intellectual content. All authors contributed to and approved the final  
4  
5 manuscript.  
6  
7

### 8 9 **Provenance and peer review**

10  
11  
12 Not commissioned; externally peer reviewed.  
13  
14

### 15 16 **Data sharing information**

17  
18  
19 No additional data are available.  
20  
21  
22  
23  
24  
25  
26  
27  
28  
29  
30  
31  
32  
33  
34  
35  
36  
37  
38  
39  
40  
41  
42  
43  
44  
45  
46  
47  
48  
49  
50  
51  
52  
53  
54  
55  
56  
57  
58  
59  
60

## References

1. Platts-Mills TF, Leacock B, Cabanas JG, *et al.* Emergency medical services use by the elderly: analysis of a statewide database. *Prehosp Emerg Care* 2010;**14**:329-33.
2. Schwake L, Wollenschlager I, Stremmel W, *et al.* Adverse drug reactions and deliberate self-poisoning as cause of admission to the intensive care unit: a 1-year prospective observational cohort study. *Intensive Care Med* 2009;**35**:266-74.
3. McGrath J. A survey of deliberate self-poisoning. *Med J Aust* 1989;**150**:317-8, 320-1, 324.
4. Henderson A, Wright M, Pond SM. Experience with 732 acute overdose patients admitted to an intensive care unit over six years. *Med J Aust* 1993;**158**:28-30.
5. Hendrix L, Verelst S, Desruelles D, *et al.* Deliberate self-poisoning: characteristics of patients and impact on the emergency department of a large university hospital. *Emerg Med J* 2012.
6. Hollander JE, McCracken G, Johnson S, *et al.* Emergency department observation of poisoned patients: how long is necessary? *Acad Emerg Med* 1999;**6**:887-94.
7. Heyerdahl F, Bjornaas MA, Dahl R, *et al.* Repetition of acute poisoning in Oslo: 1-year prospective study. *Br J Psychiatry* 2009;**194**:73-9.
8. Xiang Y, Zhao W, Xiang H, *et al.* ED visits for drug-related poisoning in the United States, 2007. *Am J Emerg Med* 2011;**30**:293-301.
9. Hamad AE, Al-Ghadban A, Carvounis CP, *et al.* Predicting the need for medical intensive care monitoring in drug-overdosed patients. *J Intensive Care Med* 2000;**15**:321-328.
10. Flabouris A, Hart GK, George C. Outcomes of patients admitted to tertiary intensive care units after interhospital transfer: comparison with patients admitted from emergency departments. *Crit Care Resusc* 2008;**10**:97-105.

- 1  
2  
3 11. Spiller HA, Singleton MD. Comparison of incidence of hospital utilization for poisoning and  
4  
5 other injury types. *Public Health Rep* 2011;**126**:94-9.  
6  
7
- 8 12. Wadman MC, Muelleman RL, Coto JA, *et al*. The pyramid of injury: using ecodes to  
9  
10 accurately describe the burden of injury. *Ann Emerg Med* 2003;**42**:468-78.  
11  
12
- 13 13. Matsuda S, Ishikawa KB, Kuwabara K, *et al*. Development and use of the Japanese case-mix  
14  
15 system. *Eurohealth* 2008;**14**:25-30.  
16  
17
- 18 14. Statistics and Information Department, Minister's Secretariat, Ministry of Health, Labour and  
19  
20 Welfare. *2008 Summary of Static/Dynamic Surveys of Medical Institutions and Hospital*  
21  
22 *Report (in Japanese)*. Tokyo: Health and Welfare Statistics Association, 2010.  
23  
24
- 25 15. Japan International Cooperation Agency. Emergency medical care. *Japan's experiences in*  
26  
27 *public Health and medical systems: towards improving public health and medical systems in*  
28  
29 *developing countries*. Tokyo: Institute for International Cooperation, Japan International  
30  
31 Cooperation Agency, 2005:227-244.  
32  
33
- 34 16. Takeuchi E. Reliability of grading systems of impaired consciousness. Statistical evaluation  
35  
36 of inter-rater reliability and validity of the Japan coma scale (JCS) (in Japanese). *J Osaka*  
37  
38 *Medical College*, 1988:20-30.  
39  
40
- 41 17. World Health Organization. *The global burden of disease: 2004 update*: Author, 2004.  
42  
43
- 44 18. Gower J, Lubbe S, Roux NL. *Understanding biplots*: Wiley, 2011.  
45
- 46 19. R Development Core Team. *R: A language and environment for statistical computing*. Vienna,  
47  
48 Austria: R Foundation for Statistical Computing, 2011.  
49  
50
- 51 20. Hirata K, Matsumoto Y, Tomioka J, *et al*. Acute drug poisoning at critical care departments in  
52  
53 Japan. *Jpn J Hosp Pharm* 1998;**24**:340-348.  
54  
55  
56  
57  
58  
59  
60

- 1  
2  
3  
4  
5  
6  
7  
8  
9  
10  
11  
12  
13  
14  
15  
16  
17  
18  
19  
20  
21  
22  
23  
24  
25  
26  
27  
28  
29  
30  
31  
32  
33  
34  
35  
36  
37  
38  
39  
40  
41  
42  
43  
44  
45  
46  
47  
48  
49  
50  
51  
52  
53  
54  
55  
56  
57  
58  
59  
60
21. National Institute for Health and Clinical Excellence. *Self-harm: the short-term physical and psychological management and secondary prevention of self-harm in primary and secondary care*. Manchester: Author, 2004.
  22. Fire and Disaster Management Agency of the Ministry of Internal Affairs and Communications. *Reports on emergency medicine 2009* Tokyo, 2010.
  23. Eizadi Mood N, Sabzghabae AM, Khalili-Dehkordi Z. Applicability of different scoring systems in outcome prediction of patients with mixed drug poisoning-induced coma. *Indian J Anaesth* 2011;**55**:599-604.
  24. Gwini SM, Shaw D, Iqbal M, *et al*. Exploratory study of factors associated with adverse clinical features in patients presenting with non-fatal drug overdose/self-poisoning to the ambulance service. *Emerg Med J* 2011;**28**:892-4.

**Table 1** Characteristics of emergency hospital admissions

| Characteristic                                                                      | N of admissions | % of admissions | 95% CI    |
|-------------------------------------------------------------------------------------|-----------------|-----------------|-----------|
| Age                                                                                 |                 |                 |           |
| 0–14                                                                                | 177 092         | 15.3            | 15.2–15.4 |
| 15–64                                                                               | 382 025         | 33.0            | 32.9–33.1 |
| ≥ 65                                                                                | 598 776         | 51.7            | 51.6–51.8 |
| Gender women                                                                        | 547 280         | 47.3            | 47.2–47.3 |
| Top 10 causes of admissions and drug poisoning (Disease code)                       |                 |                 |           |
| 1. Pneumonia, acute bronchitis, acute bronchiolitis (040080)                        | 117 649         | 10.2            | 10.1–10.2 |
| 2. Stroke (010060)                                                                  | 63 931          | 5.5             | 5.5–5.6   |
| 3. Heart failure (050130)                                                           | 32 993          | 2.8             | 2.8–2.9   |
| 4. Intestinal obstruction without hernia (060210)                                   | 28 701          | 2.5             | 2.5–2.5   |
| 5. Fracture of proximal femur (160800)                                              | 25 905          | 2.2             | 2.2–2.3   |
| 6. Viral enteritis (150010)                                                         | 24 920          | 2.2             | 2.1–2.2   |
| 7. Asthma (040100)                                                                  | 23 858          | 2.1             | 2.0–2.1   |
| 8. Angina pectoris, chronic ischemic heart disease (050050)                         | 20 775          | 1.8             | 1.8–1.8   |
| 9. Disorder associated with shortened gestation period or low birth weight (140010) | 20 540          | 1.8             | 1.8–1.8   |
| 10. Renal infection (110310)                                                        | 19 853          | 1.7             | 1.7–1.7   |
| 41. Drug poisoning (161070a)                                                        | 6 748           | 0.6             | 0.6–0.6   |
| Other causes                                                                        | 769 326         | 66.4            | 66.4–66.5 |
| Comorbid mental illness                                                             | 23 279          | 2.0             | 2.0–2.0   |
| Deep coma                                                                           | 26 792          | 2.3             | 2.3–2.3   |
| Ambulance services                                                                  | 311 333         | 26.9            | 26.8–27.0 |
| Tertiary EMS                                                                        | 54 938          | 4.7             | 4.7–4.8   |
| Surgical procedures                                                                 | 321 974         | 27.8            | 27.7–27.9 |
| Length of stay (days)                                                               |                 |                 |           |
| ≤ 3                                                                                 | 135 096         | 11.7            | 11.6–11.7 |
| 4–7                                                                                 | 266 651         | 23.0            | 23.0–23.1 |
| 8–14                                                                                | 296 549         | 25.6            | 25.5–25.7 |
| 15–30                                                                               | 258 717         | 22.3            | 22.3–22.4 |
| 31–60                                                                               | 136 014         | 11.7            | 11.7–11.8 |
| ≥ 60                                                                                | 64 866          | 5.6             | 5.6–5.6   |
| Death during hospitalization                                                        | 78 226          | 6.8             | 6.7–6.8   |

Comorbidity of mental illness was defined as the following ICD-10 codes as comorbidities: unipolar depressive disorders (F32–F33), bipolar affective disorder (F30–F31), schizophrenia (F20–F29), alcohol use disorders (F10), drug use disorders (F11–F16 and F18–F19), post-traumatic stress disorder (F431), obsessive-compulsive disorder (F42), panic disorder (F400 and F410), or insomnia (F51). Deep coma was defined as a score on the Japan Soma Scale of 100 or more.  
EMS, emergency medical services.



## Emergency hospital admissions 19

**Table 2** Characteristics of poisoning and other causes of admissions

| Rank | Top 10 causes of admissions and drug poisoning (Disease code)                    | ICD-10 codes                                                                                                                                                                                                                                                                                                                                                                                             | N       | %    | Clinical and procedural characteristics, %/median, (rank) |                 |           |           |          |           |           |           |
|------|----------------------------------------------------------------------------------|----------------------------------------------------------------------------------------------------------------------------------------------------------------------------------------------------------------------------------------------------------------------------------------------------------------------------------------------------------------------------------------------------------|---------|------|-----------------------------------------------------------|-----------------|-----------|-----------|----------|-----------|-----------|-----------|
|      |                                                                                  |                                                                                                                                                                                                                                                                                                                                                                                                          |         |      | Age ≥ 65                                                  | Comorbid Mental | Deep Coma | Ambulance | Tertiary | Surgery   | LOS       | Mortality |
| 1    | Pneumonia, acute bronchitis, acute bronchiolitis (040080)                        | A370, A378, A379, A481, B012, B052, B371, B59, J13, J14, J15*, J16*, J17*, J18*, J20*, J21*, J22, J69*                                                                                                                                                                                                                                                                                                   | 117 649 | 10.2 | 48.7 (57)                                                 | 1.5 (53)        | 2.2 (23)  | 19.3 (53) | 2.2 (43) | 5.7 (82)  | 9.0 (62)  | 7.9 (29)  |
| 2    | Stroke (010060)                                                                  | G45*, G46*, I63*, I65*, I66*, I675, I679, I693, I978                                                                                                                                                                                                                                                                                                                                                     | 63 931  | 5.5  | 77.8 (11)                                                 | 1.5 (53)        | 4.0 (14)  | 44.1 (21) | 8.0 (21) | 8.0 (77)  | 17.0 (30) | 5.2 (35)  |
| 3    | Heart failure (050130)                                                           | I50*                                                                                                                                                                                                                                                                                                                                                                                                     | 32 993  | 2.8  | 86.0 (4)                                                  | 1.3 (60)        | 1.6 (26)  | 34.3 (27) | 9.3 (19) | 11.5 (67) | 18.0 (27) | 11.1 (24) |
| 4    | Intestinal obstruction without hernia (060210)                                   | K560, K562, K563, K564, K565, K566, K567, K913                                                                                                                                                                                                                                                                                                                                                           | 28 701  | 2.5  | 64.3 (33)                                                 | 1.9 (40)        | 0.2 (68)  | 18.1 (59) | 2.0 (48) | 19.3 (57) | 11.0 (51) | 2.4 (48)  |
| 5    | Fracture of proximal femur (160800)                                              | M2435, M2445, S7200, S7210, S7220, S7230, S7270, S7280, S7290, S730                                                                                                                                                                                                                                                                                                                                      | 25 905  | 2.2  | 90.6 (1)                                                  | 3.7 (9)         | 0.1 (75)  | 49.5 (14) | 1.5 (58) | 91.0 (5)  | 30.0 (2)  | 1.4 (58)  |
| 6    | Viral enteritis (150010)                                                         | A08*, A09                                                                                                                                                                                                                                                                                                                                                                                                | 24 920  | 2.2  | 23.4 (80)                                                 | 0.9 (73)        | 0.1 (75)  | 14.9 (67) | 0.3 (87) | 0.8 (95)  | 5.0 (89)  | 0.2 (79)  |
| 7    | Asthma (040100)                                                                  | J45*, J46                                                                                                                                                                                                                                                                                                                                                                                                | 23 858  | 2.1  | 12.0 (87)                                                 | 0.8 (76)        | 0.4 (52)  | 9.5 (85)  | 1.2 (64) | 0.5 (97)  | 6.0 (82)  | 0.3 (74)  |
| 8    | Angina pectoris, chronic ischemic heart disease (050050)                         | I20*, I25*                                                                                                                                                                                                                                                                                                                                                                                               | 20 775  | 1.8  | 68.2 (23)                                                 | 0.9 (73)        | 0.4 (52)  | 31.9 (31) | 7.7 (22) | 43.7 (29) | 7.0 (78)  | 0.8 (64)  |
| 9    | Disorder associated with shortened gestation period or low birth weight (140010) | P00*, P01*, P02*, P03*, P04*, P05*, P07*, P08*, P10*, P11*, P12*, P13*, P15*, P20*, P21*, P22*, P23*, P24*, P25*, P26*, P27*, P28*, P29*, P35*, P36*, P37*, P38, P39*, P50*, P51*, P52*, P53, P54*, P55*, P56*, P57*, P58*, P590, P591, P592, P593, P598, P599, P60, P61*, P70*, P71*, P72*, P74*, P75, P76*, P77, P780, P781, P782, P783, P789, P80*, P81*, P83*, P90, P91*, P92*, P93, P94*, P95, P96* | 20 540  | 1.8  | 0.0 (95)                                                  | 0.0 (98)        | 0.4 (52)  | 9.4 (86)  | 0.0 (97) | 10.5 (71) | 8.0 (70)  | 0.5 (69)  |
| 10   | Renal infection (110310)                                                         | N10, N151, N390                                                                                                                                                                                                                                                                                                                                                                                          | 19 853  | 1.7  | 63.7 (34)                                                 | 1.7 (44)        | 1.1 (32)  | 22.5 (47) | 1.3 (63) | 6.7 (80)  | 10.0 (55) | 1.5 (56)  |
| 41   | Drug poisoning (161070a)                                                         | T36*, T37*, T38*, T39*, T40*, T41*, T42*, T43*, T44*, T45*                                                                                                                                                                                                                                                                                                                                               | 6 748   | 0.6  | 13.4 (86)                                                 | 33.7 (1)        | 26.2 (2)  | 74.1 (2)  | 37.8 (1) | 1.7 (91)  | 2.0 (100) | 0.3 (74)  |

Rankings were based on data from the top 100 causes of admissions. Comorbidity of mental illness was defined as the following ICD-10 codes as comorbidities: unipolar depressive disorders (F32–F33), bipolar affective disorder (F30–F31), schizophrenia (F20–F29), alcohol use disorders (F10), drug use disorders (F11–F16 and F18–F19), post-traumatic stress disorder (F431), obsessive-compulsive disorder (F42), panic disorder (F400 and F410), or insomnia (F51). Deep coma was defined as a score on the Japan Soma Scale of 100 or more. Ambulance, ambulance services; LOS, median length of stay; Mortality, in-hospital mortality; Surgery, surgical procedures; Tertiary, tertiary emergency medical services; \*, wild card.

1  
2  
3  
4  
5  
6  
7  
8  
9  
10  
11  
12  
13  
14  
15  
16  
17  
18  
19  
20  
21  
22  
23  
24  
25  
26  
27  
28  
29  
30  
31  
32  
33  
34  
35  
36  
37  
38  
39  
40  
41  
42  
43  
44  
45  
46  
47  
48  
49  
50  
51  
52  
53  
54  
55  
56  
57  
58  
59  
60

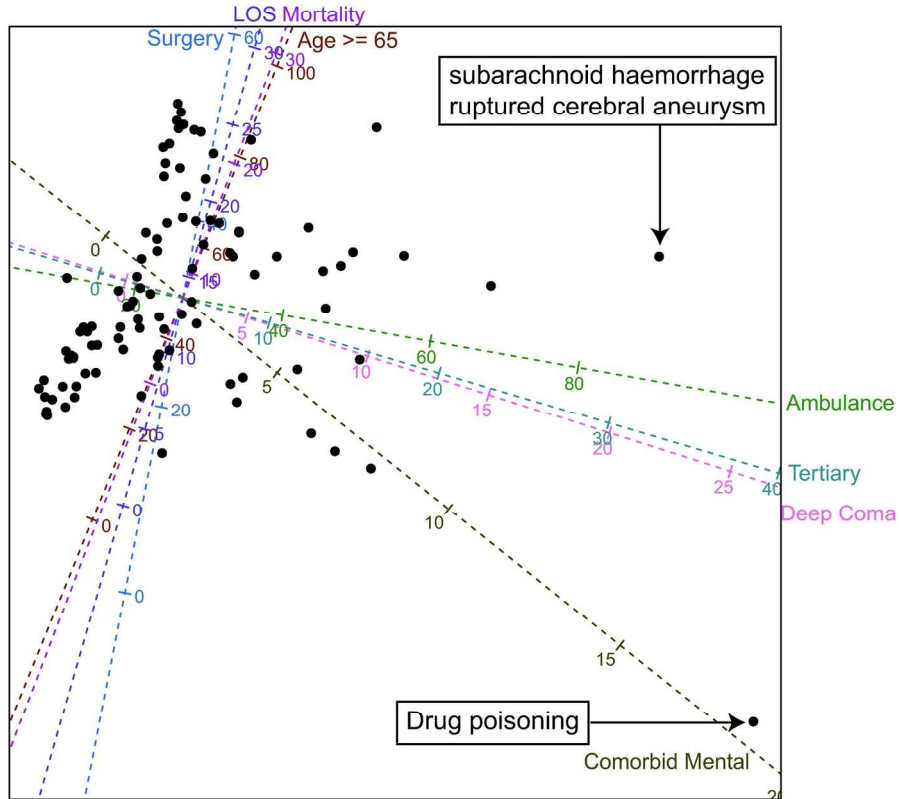

The predictive principal component biplot on data from the characteristics of the top 100 causes. Each dot represents one of the causes. Eight axes are positioned and calibrated so that the orthogonal projection of a dot onto an axis 'predicts' as best as is graphically possible the value of the corresponding disease on the corresponding variable. Ambulance, ambulance services; LOS, median length of stay; Mortality, in-hospital mortality; Surgery, surgical procedures; Tertiary, tertiary emergency medical services.  
177x177mm (300 x 300 DPI)

## Supplemental Table

| Rank | Clinical diagnosis (Disease code)                                                                   | ICD-10 codes                                                                                                                                                                                                                                                                                                                                                                                             | N       | %    | Clinical and procedural characteristics, %/median, (rank) |                 |           |           |          |           |           | LOS       | Mortality |
|------|-----------------------------------------------------------------------------------------------------|----------------------------------------------------------------------------------------------------------------------------------------------------------------------------------------------------------------------------------------------------------------------------------------------------------------------------------------------------------------------------------------------------------|---------|------|-----------------------------------------------------------|-----------------|-----------|-----------|----------|-----------|-----------|-----------|-----------|
|      |                                                                                                     |                                                                                                                                                                                                                                                                                                                                                                                                          |         |      | Age ≥ 65                                                  | Comorbid Mental | Deep Coma | Ambulance | Tertiary | Surgery   |           |           |           |
| 1    | Pneumonia, acute bronchitis, acute bronchiolitis (040080)                                           | A370, A378, A379, A481, B012, B052, B371, B59, J13, J14, J15*, J16*, J17*, J18*, J20*, J21*, J22, J69*                                                                                                                                                                                                                                                                                                   | 117 649 | 10.2 | 48.7 (57)                                                 | 1.5 (53)        | 2.2 (23)  | 19.3 (53) | 2.2 (43) | 5.7 (82)  | 9.0 (62)  | 7.9 (29)  |           |
| 2    | Stroke (010060)                                                                                     | G45*, G46*, I63*, I65*, I66*, I675, I679, I693, I978                                                                                                                                                                                                                                                                                                                                                     | 63 931  | 5.5  | 77.8 (11)                                                 | 1.5 (53)        | 4.0 (14)  | 44.1 (21) | 8.0 (21) | 8.0 (77)  | 17.0 (30) | 5.2 (35)  |           |
| 3    | Heart failure (050130)                                                                              | I50*                                                                                                                                                                                                                                                                                                                                                                                                     | 32 993  | 2.8  | 86.0 (4)                                                  | 1.3 (60)        | 1.6 (26)  | 34.3 (27) | 9.3 (19) | 11.5 (67) | 18.0 (27) | 11.1 (24) |           |
| 4    | Intestinal obstruction without hernia (060210)                                                      | K560, K562, K563, K564, K565, K566, K567, K913                                                                                                                                                                                                                                                                                                                                                           | 28 701  | 2.5  | 64.3 (33)                                                 | 1.9 (40)        | 0.2 (68)  | 18.1 (59) | 2.0 (48) | 19.3 (57) | 11.0 (51) | 2.4 (48)  |           |
| 5    | Fracture of proximal femur (160800)                                                                 | M2435, M2445, S7200, S7210, S7220, S7230, S7270, S7280, S7290, S730                                                                                                                                                                                                                                                                                                                                      | 25 905  | 2.2  | 90.6 (1)                                                  | 3.7 (9)         | 0.1 (75)  | 49.5 (14) | 1.5 (58) | 91.0 (5)  | 30.0 (2)  | 1.4 (58)  |           |
| 6    | Viral enteritis (150010)                                                                            | A08*, A09                                                                                                                                                                                                                                                                                                                                                                                                | 24 920  | 2.2  | 23.4 (80)                                                 | 0.9 (73)        | 0.1 (75)  | 14.9 (67) | 0.3 (87) | 0.8 (95)  | 5.0 (89)  | 0.2 (79)  |           |
| 7    | Asthma (040100)                                                                                     | J45*, J46                                                                                                                                                                                                                                                                                                                                                                                                | 23 858  | 2.1  | 12.0 (87)                                                 | 0.8 (76)        | 0.4 (52)  | 9.5 (85)  | 1.2 (64) | 0.5 (97)  | 6.0 (82)  | 0.3 (74)  |           |
| 8    | Angina pectoris, chronic ischemic heart disease (050050)                                            | I20*, I25*                                                                                                                                                                                                                                                                                                                                                                                               | 20 775  | 1.8  | 68.2 (23)                                                 | 0.9 (73)        | 0.4 (52)  | 31.9 (31) | 7.7 (22) | 43.7 (29) | 7.0 (78)  | 0.8 (64)  |           |
| 9    | Disorder associated with shortened gestation period or low birth weight (140010)                    | P00*, P01*, P02*, P03*, P04*, P05*, P07*, P08*, P10*, P11*, P12*, P13*, P15*, P20*, P21*, P22*, P23*, P24*, P25*, P26*, P27*, P28*, P29*, P35*, P36*, P37*, P38, P39*, P50*, P51*, P52*, P53, P54*, P55*, P56*, P57*, P58*, P590, P591, P592, P593, P598, P599, P60, P61*, P70*, P71*, P72*, P74*, P75, P76*, P77, P780, P781, P782, P783, P789, P80*, P81*, P83*, P90, P91*, P92*, P93, P94*, P95, P96* | 20 540  | 1.8  | 0.0 (95)                                                  | 0.0 (98)        | 0.4 (52)  | 9.4 (86)  | 0.0 (97) | 10.5 (71) | 8.0 (70)  | 0.5 (69)  |           |
| 10   | Renal infection (110310)                                                                            | N10, N151, N390                                                                                                                                                                                                                                                                                                                                                                                          | 19 853  | 1.7  | 63.7 (34)                                                 | 1.7 (44)        | 1.1 (32)  | 22.5 (47) | 1.3 (63) | 6.7 (80)  | 10.0 (55) | 1.5 (56)  |           |
| 11   | Gastroduodenal ulcer, gastric diverticulum, pyloric stenosis (060140)                               | K25*, K26*, K311, K312, K314                                                                                                                                                                                                                                                                                                                                                                             | 19 387  | 1.7  | 53.5 (52)                                                 | 1.6 (47)        | 0.4 (52)  | 37.2 (25) | 6.6 (26) | 62.1 (17) | 11.0 (51) | 1.8 (55)  |           |
| 12   | Chronic nephritic syndrome/chronic interstitial nephritis/chronic renal failure (110280)            | I120, I129, N02*, N03*, N05*, N06*, N07*, N08*, N11*, N12, N14*, N18*, N391, N392                                                                                                                                                                                                                                                                                                                        | 19 295  | 1.7  | 67.3 (27)                                                 | 1.4 (58)        | 1.0 (33)  | 18.7 (55) | 3.0 (37) | 31.2 (43) | 16.0 (34) | 6.8 (33)  |           |
| 13   | Appendicitis (060150)                                                                               | K35*, K36, K37, K38*                                                                                                                                                                                                                                                                                                                                                                                     | 18 566  | 1.6  | 11.9 (88)                                                 | 0.8 (76)        | 0.0 (82)  | 9.1 (88)  | 1.5 (58) | 75.4 (10) | 6.0 (82)  | 0.0 (85)  |           |
| 14   | Bile duct (intra/extra hepatic) lithiasis (060340)                                                  | K803, K804, K805, K830, K831, K832, K833, K834, K838, K839, K915                                                                                                                                                                                                                                                                                                                                         | 17 869  | 1.5  | 75.6 (13)                                                 | 1.1 (68)        | 0.3 (60)  | 16.9 (64) | 2.3 (42) | 68.3 (14) | 14.0 (44) | 2.9 (43)  |           |
| 15   | Inflammation of oesophagus, stomach, duodenum and other intestines (other benign diseases) (060130) | B054, I880, K20, K21*, K220, K221, K222, K223, K224, K225, K226, K228, K229, K23*, K27*, K28*, K29*, K30, K310, K313, K315, K316, K318, K52*, K58*, K627, K633, K634, K638, K639, K90*, K910, K911, K912, K914, K92*, K93*                                                                                                                                                                               | 17 715  | 1.5  | 60.8 (47)                                                 | 2.3 (28)        | 0.5 (50)  | 25.9 (42) | 4.0 (33) | 31.8 (42) | 9.0 (62)  | 2.3 (49)  |           |
| 16   | Skull and intracranial injury (160100)                                                              | S000, S007, S008, S009, S010, S017, S018, S019, S020*, S021*, S06*, S071, S079, S080, S089, S090, S091, S097                                                                                                                                                                                                                                                                                             | 17 372  | 1.5  | 57.9 (49)                                                 | 2.6 (22)        | 8.1 (9)   | 63.9 (6)  | 18.0 (8) | 44.4 (28) | 8.0 (70)  | 5.8 (34)  |           |
| 17   | Nontraumatic intracranial haematoma (excluding nontraumatic subdural haematoma) (010040)            | I61*, I629, I680, Q280, Q281, Q282, Q283                                                                                                                                                                                                                                                                                                                                                                 | 16 389  | 1.4  | 62.2 (42)                                                 | 1.1 (68)        | 19.6 (3)  | 70.0 (3)  | 21.8 (3) | 22.3 (55) | 23.0 (11) | 15.6 (21) |           |

Supplemental Table

| Rank | Clinical diagnosis (Disease code)                                                                                        | ICD-10 codes                                                                                                                             | N      | %   | Clinical and procedural characteristics, %/median, (rank) |                 |           |           |           |           |           |           |
|------|--------------------------------------------------------------------------------------------------------------------------|------------------------------------------------------------------------------------------------------------------------------------------|--------|-----|-----------------------------------------------------------|-----------------|-----------|-----------|-----------|-----------|-----------|-----------|
|      |                                                                                                                          |                                                                                                                                          |        |     | Age ≥ 65                                                  | Comorbid Mental | Deep Coma | Ambulance | Tertiary  | Surgery   | LOS       | Mortality |
| 18   | Acute myocardial infarction, recurrent myocardial infarction (050030)                                                    | I21*, I22*, I24*                                                                                                                         | 15 812 | 1.4 | 63.6 (35)                                                 | 0.8 (76)        | 3.0 (19)  | 56.5 (8)  | 21.5 (4)  | 85.2 (6)  | 15.0 (38) | 7.9 (29)  |
| 19   | Benign disease of small and large intestine (including benign tumour) (060100)                                           | D12*, D133, D191, D197, D199, D201, D372, D373, D374, D375, K57*, K620, K621, K635                                                       | 13 657 | 1.2 | 43.6 (64)                                                 | 0.7 (82)        | 0.0 (82)  | 7.9 (90)  | 1.1 (65)  | 45.9 (27) | 7.0 (78)  | 0.3 (74)  |
| 20   | Malignant pulmonary tumour (040040)                                                                                      | C33, C34*, C780, D021, D022, D024                                                                                                        | 13 327 | 1.2 | 75.3 (14)                                                 | 2.3 (28)        | 0.8 (38)  | 19.5 (52) | 1.4 (60)  | 10.9 (69) | 21.0 (20) | 40.5 (4)  |
| 21   | Epilepsy (010230)                                                                                                        | G40*, G41*                                                                                                                               | 12 668 | 1.1 | 34.6 (70)                                                 | 3.3 (12)        | 12.7 (5)  | 68.6 (4)  | 10.4 (15) | 2.3 (88)  | 5.0 (89)  | 0.9 (62)  |
| 22   | Vestibular dysfunction (030400)                                                                                          | H810, H811, H812, H813, H818, H819                                                                                                       | 12 589 | 1.1 | 56.8 (51)                                                 | 1.2 (66)        | 0.0 (82)  | 48.3 (15) | 0.4 (86)  | 0.3 (99)  | 5.0 (89)  | 0.0 (85)  |
| 23   | Hydrops of gallbladder, cholecystitis (060335)                                                                           | D135, K800, K801, K81*, K820, K821, K822, K823, K824, K828, K829, K835, K870                                                             | 11 924 | 1.0 | 63.2 (39)                                                 | 1.5 (53)        | 0.3 (60)  | 18.2 (58) | 2.2 (43)  | 55.5 (22) | 15.0 (38) | 1.5 (56)  |
| 24   | Malignant gastric tumour (060020)                                                                                        | C16*, D002                                                                                                                               | 11 210 | 1.0 | 73.7 (16)                                                 | 1.6 (47)        | 0.4 (52)  | 15.4 (66) | 1.1 (65)  | 43.4 (30) | 23.0 (11) | 29.2 (7)  |
| 25   | Blood poisoning (180010)                                                                                                 | A021, A327, A391, A392, A393, A394, A395, A398, A399, A40*, A41*, B007, B250, B252, B376, B377, B387, B393, B407, B417, B427, B447, B464 | 10 923 | 0.9 | 67.4 (26)                                                 | 2.1 (31)        | 6.2 (11)  | 40.8 (23) | 12.1 (12) | 29.7 (46) | 17.0 (30) | 25.9 (10) |
| 26   | Acute pyoderma (080011)                                                                                                  | A46, L00, L01*, L020, L021, L022, L024, L028, L029, L03*, L08*                                                                           | 10 547 | 0.9 | 49.7 (55)                                                 | 1.1 (68)        | 0.2 (68)  | 9.3 (87)  | 0.7 (75)  | 13.5 (63) | 10.0 (55) | 0.5 (69)  |
| 27   | Upper respiratory tract inflammation (030270)                                                                            | B302, J00, J02*, J06*, J31*                                                                                                              | 10 124 | 0.9 | 6.4 (90)                                                  | 0.3 (93)        | 0.2 (68)  | 7.9 (90)  | 0.1 (91)  | 0.3 (99)  | 5.0 (89)  | 0.0 (85)  |
| 28   | Impairment from fracture of thoracic or lumbar vertebra or lower (including thoracic/lumbar spinal cord injury) (160690) | S220*, S221*, S230, S231, S232, S233, S240, S241, S242, S245, S320*, S330, S331, S340, S341, S342, S343, S344, S345, T08*                | 9 547  | 0.8 | 82.9 (8)                                                  | 2.7 (19)        | 0.1 (75)  | 45.3 (19) | 2.4 (39)  | 8.2 (76)  | 26.0 (6)  | 0.3 (74)  |
| 29   | Cirrhosis (including biliary cirrhosis) (060300)                                                                         | I81, I820, I850, I859, I864, I982, K717, K721, K729, K740, K741, K742, K743, K744, K745, K746, K765, K766                                | 9 189  | 0.8 | 61.7 (44)                                                 | 2.7 (19)        | 3.3 (17)  | 33.4 (28) | 6.2 (27)  | 39.5 (33) | 17.0 (30) | 19.4 (17) |
| 30   | Malignant tumour of liver/intrahepatic bile duct (including secondary tumour) (060050)                                   | C22*, C787, D015, D376                                                                                                                   | 8 854  | 0.8 | 74.5 (15)                                                 | 1.5 (53)        | 1.0 (33)  | 18.0 (60) | 1.6 (55)  | 31.2 (43) | 17.0 (30) | 42.9 (3)  |
| 31   | Acute tonsillitis, acute laryngopharyngitis (040060)                                                                     | A691, J03*, J04*, J05*, J390, J391, J392, J393, J399                                                                                     | 8 795  | 0.8 | 6.3 (91)                                                  | 0.5 (87)        | 0.1 (75)  | 5.6 (93)  | 0.5 (80)  | 2.7 (87)  | 5.0 (89)  | 0.1 (82)  |
| 32   | Pneumothorax (040200)                                                                                                    | J93*                                                                                                                                     | 8 764  | 0.8 | 27.4 (77)                                                 | 0.6 (85)        | 0.3 (60)  | 14.6 (68) | 2.2 (43)  | 37.3 (37) | 9.0 (62)  | 1.3 (59)  |
| 33   | Malignant tumour of colon (ascending to sigmoid colon) (060035)                                                          | C18*, C260, C269, C775, C785, D010                                                                                                       | 8 409  | 0.7 | 71.6 (19)                                                 | 1.5 (53)        | 0.3 (60)  | 12.7 (77) | 1.4 (60)  | 62.2 (16) | 24.0 (9)  | 17.2 (18) |
| 34   | Dehydration (100380)                                                                                                     | E86                                                                                                                                      | 8 380  | 0.7 | 61.5 (45)                                                 | 3.2 (13)        | 1.5 (29)  | 30.2 (35) | 1.6 (55)  | 2.1 (89)  | 6.0 (82)  | 2.6 (47)  |
| 35   | Tachyarrhythmia (050070)                                                                                                 | I456, I47*, I48, I490, I491, I492, I493, I494, I498                                                                                      | 7 779  | 0.7 | 65.5 (30)                                                 | 1.4 (58)        | 2.5 (22)  | 33.3 (29) | 6.7 (25)  | 21.6 (56) | 9.0 (62)  | 2.2 (51)  |
| 36   | Bradyarrhythmia (050210)                                                                                                 | I440, I441, I442, I443, I444, I445, I446, I447, I450, I451, I452, I453, I454, I455, I458, I459, I46*, I495, T821                         | 7 331  | 0.6 | 85.8 (5)                                                  | 1.8 (43)        | 16.0 (4)  | 47.0 (17) | 16.3 (9)  | 62.3 (15) | 13.0 (50) | 17.1 (19) |
| 37   | Premature labour, threatened premature labour (120170)                                                                   | O470, O471, O479, O60                                                                                                                    | 7 161  | 0.6 | 0.0 (95)                                                  | 0.5 (87)        | 0.0 (82)  | 13.7 (71) | 0.0 (97)  | 17.9 (59) | 16.0 (34) | 0.0 (85)  |
| 38   | Other infectious disease                                                                                                 | A060, A061, A062, A063, A067, A068, A069, A07*,                                                                                          | 6 959  | 0.6 | 22.5 (82)                                                 | 0.3 (93)        | 0.8 (38)  | 11.6 (82) | 1.9 (51)  | 9.3 (73)  | 6.0 (82)  | 5.1 (36)  |

## Supplemental Table

| Rank | Clinical diagnosis (Disease code)                                         | ICD-10 codes                                                                                                                                                                                                                                                                                                                                                                                                                                                                                                                                                                                                                                                                                                                                                                                                                                                                                                                                                                                                                                                                                        | N     | %   | Clinical and procedural characteristics, %/median, (rank) |                 |           |           |          |           |           |           |  |
|------|---------------------------------------------------------------------------|-----------------------------------------------------------------------------------------------------------------------------------------------------------------------------------------------------------------------------------------------------------------------------------------------------------------------------------------------------------------------------------------------------------------------------------------------------------------------------------------------------------------------------------------------------------------------------------------------------------------------------------------------------------------------------------------------------------------------------------------------------------------------------------------------------------------------------------------------------------------------------------------------------------------------------------------------------------------------------------------------------------------------------------------------------------------------------------------------------|-------|-----|-----------------------------------------------------------|-----------------|-----------|-----------|----------|-----------|-----------|-----------|--|
|      |                                                                           |                                                                                                                                                                                                                                                                                                                                                                                                                                                                                                                                                                                                                                                                                                                                                                                                                                                                                                                                                                                                                                                                                                     |       |     | Age ≥ 65                                                  | Comorbid Mental | Deep Coma | Ambulance | Tertiary | Surgery   | LOS       | Mortality |  |
|      | (excluding fungal infection) (180030)                                     | A180, A181, A184, A185, A186, A187, A188, A20*, A21*, A22*, A23*, A24*, A25*, A26*, A27*, A28*, A30*, A311, A318, A320, A328, A329, A33, A34, A35, A36*, A371, A38, A42*, A43*, A44*, A482, A484, A488, A49*, A68*, A690, A692, A698, A699, A70, A748, A749, A75*, A77*, A78, A79*, A90, A91, A92*, A93*, A94, A95*, A96*, A98*, A99, B001, B002, B008, B009, B03, B04, B07, B080, B081, B082, B084, B085, B088, B09, B258, B259, B260, B268, B269, B33*, B34*, B35*, B36*, B370, B372, B373, B374, B378, B379, B380, B381, B382, B383, B388, B389, B390, B391, B392, B394, B395, B399, B400, B401, B402, B403, B408, B409, B410, B418, B419, B420, B421, B428, B429, B430, B432, B438, B439, B442, B448, B449, B460, B461, B462, B463, B465, B468, B469, B47*, B48*, B49, B50*, B51*, B52*, B53*, B54, B55*, B56*, B57*, B580, B581, B583, B588, B589, B60*, B64, B650, B651, B652, B653, B658, B660, B661, B662, B663, B665, B668, B669, B67*, B68*, B69*, B70*, B71*, B72, B73, B74*, B75, B76*, B77*, B78*, B79, B80, B81*, B82*, B83*, B85*, B86, B87*, B88*, B90*, B91, B92, B94*, T793, U049 |       |     |                                                           |                 |           |           |          |           |           |           |  |
| 39   | Complications due to operation and procedure (180040)                     | T80*, T81*, T820, T822, T823, T824, T825, T826, T827, T828, T829, T83*, T84*, T85*, T86*, T87*, T880, T881, T882, T883, T884, T885, T886, T888, T889                                                                                                                                                                                                                                                                                                                                                                                                                                                                                                                                                                                                                                                                                                                                                                                                                                                                                                                                                | 6 943 | 0.6 | 53.2 (54)                                                 | 1.3 (60)        | 0.6 (45)  | 12.5 (80) | 2.0 (48) | 60.0 (19) | 10.0 (55) | 2.3 (49)  |  |
| 40   | Pancreas and spleen tumor (06007x)                                        | C25*, C261, D136, D137, D377                                                                                                                                                                                                                                                                                                                                                                                                                                                                                                                                                                                                                                                                                                                                                                                                                                                                                                                                                                                                                                                                        | 6 815 | 0.6 | 72.6 (17)                                                 | 1.9 (40)        | 0.6 (45)  | 12.0 (81) | 0.6 (78) | 41.2 (31) | 22.0 (18) | 34.9 (5)  |  |
| 41   | Drug poisoning (161070a)                                                  | T36*, T37*, T38*, T39*, T40*, T41*, T42*, T43*, T44*, T45*                                                                                                                                                                                                                                                                                                                                                                                                                                                                                                                                                                                                                                                                                                                                                                                                                                                                                                                                                                                                                                          | 6 748 | 0.6 | 13.4 (86)                                                 | 33.7 (1)        | 26.2 (2)  | 74.1 (2)  | 37.8 (1) | 1.7 (91)  | 2.0 (100) | 0.3 (74)  |  |
| 42   | Peritonitis, abdominal abscess (excluding female genital organs) (060370) | A183, K630, K631, K632, K65*, K67*                                                                                                                                                                                                                                                                                                                                                                                                                                                                                                                                                                                                                                                                                                                                                                                                                                                                                                                                                                                                                                                                  | 6 746 | 0.6 | 48.0 (59)                                                 | 1.6 (47)        | 1.0 (33)  | 28.5 (37) | 7.0 (24) | 56.6 (21) | 16.0 (34) | 7.7 (32)  |  |
| 43   | Acute pancreatitis (060350)                                               | B263, K85, K863, K871                                                                                                                                                                                                                                                                                                                                                                                                                                                                                                                                                                                                                                                                                                                                                                                                                                                                                                                                                                                                                                                                               | 6 494 | 0.6 | 43.6 (64)                                                 | 3.9 (7)         | 0.3 (60)  | 24.3 (44) | 4.5 (30) | 17.2 (61) | 14.0 (44) | 2.8 (45)  |  |
| 44   | Type 2 diabetes (excluding diabetic ketoacidosis) (100070)                | E112, E113, E114, E115, E116, E117, E118, E119                                                                                                                                                                                                                                                                                                                                                                                                                                                                                                                                                                                                                                                                                                                                                                                                                                                                                                                                                                                                                                                      | 6 265 | 0.5 | 58.1 (48)                                                 | 3.9 (7)         | 1.0 (33)  | 18.5 (57) | 1.0 (68) | 8.9 (74)  | 18.0 (27) | 0.9 (62)  |  |
| 45   | Inflammation with cerebrospinal infection (010080)                        | A066, A321, A390, A80*, A82*, A838, A839, A858, A88*, A89, B003, B004, B005, B010, B011, B020, B021, B050, B051, B060, B261, B262, B375, B384, B431, B582, G00*, G02*, G03*, G041, G042, G048, G049, G05*, G06*, G07, G08, G09, G958                                                                                                                                                                                                                                                                                                                                                                                                                                                                                                                                                                                                                                                                                                                                                                                                                                                                | 5 850 | 0.5 | 15.0 (85)                                                 | 1.3 (60)        | 4.0 (14)  | 20.8 (50) | 4.6 (28) | 8.0 (77)  | 9.0 (62)  | 2.2 (51)  |  |
| 46   | Subarachnoid haemorrhage, ruptured cerebral aneurysm (010020)             | I60*                                                                                                                                                                                                                                                                                                                                                                                                                                                                                                                                                                                                                                                                                                                                                                                                                                                                                                                                                                                                                                                                                                | 5 779 | 0.5 | 47.9 (60)                                                 | 0.8 (76)        | 33.9 (1)  | 76.0 (1)  | 30.3 (2) | 73.2 (11) | 28.0 (4)  | 26.9 (9)  |  |
| 47   | Bacterial enteritis (150020)                                              | A00*, A01*, A020, A022, A028, A029, A030, A031, A032, A033, A038, A039, A040, A041, A042, A043, A044, A045, A046, A047, A048, A049, A050, A052,                                                                                                                                                                                                                                                                                                                                                                                                                                                                                                                                                                                                                                                                                                                                                                                                                                                                                                                                                     | 5 632 | 0.5 | 25.1 (78)                                                 | 0.8 (76)        | 0.2 (68)  | 13.1 (74) | 0.6 (78) | 1.7 (91)  | 6.0 (82)  | 1.0 (60)  |  |

1  
2  
3  
4  
5  
6  
7  
8  
9  
10  
11  
12  
13  
14  
15  
16  
17  
18  
19  
20  
21  
22  
23  
24  
25  
26  
27  
28  
29  
30  
31  
32  
33  
34  
35  
36  
37  
38  
39  
40  
41  
42  
43  
44  
45  
46  
47  
48  
49

## Supplemental Table

| Rank | Clinical diagnosis (Disease code)                | ICD-10 codes                                                                                                                                                                                                                                                                                                                                                                                                                                                                                                                                                                                                                                                                                                                                                                                                                                                                                                                                                                                                                                                                                                                                                                                                                                                                                                                                                                                                                                                                       | N     | %   | Clinical and procedural characteristics, %/median, (rank) |                 |           |           |           |           |           |           |  |
|------|--------------------------------------------------|------------------------------------------------------------------------------------------------------------------------------------------------------------------------------------------------------------------------------------------------------------------------------------------------------------------------------------------------------------------------------------------------------------------------------------------------------------------------------------------------------------------------------------------------------------------------------------------------------------------------------------------------------------------------------------------------------------------------------------------------------------------------------------------------------------------------------------------------------------------------------------------------------------------------------------------------------------------------------------------------------------------------------------------------------------------------------------------------------------------------------------------------------------------------------------------------------------------------------------------------------------------------------------------------------------------------------------------------------------------------------------------------------------------------------------------------------------------------------------|-------|-----|-----------------------------------------------------------|-----------------|-----------|-----------|-----------|-----------|-----------|-----------|--|
|      |                                                  |                                                                                                                                                                                                                                                                                                                                                                                                                                                                                                                                                                                                                                                                                                                                                                                                                                                                                                                                                                                                                                                                                                                                                                                                                                                                                                                                                                                                                                                                                    |       |     | Age ≥ 65                                                  | Comorbid Mental | Deep Coma | Ambulance | Tertiary  | Surgery   | LOS       | Mortality |  |
|      |                                                  | A053, A054, A058, A059                                                                                                                                                                                                                                                                                                                                                                                                                                                                                                                                                                                                                                                                                                                                                                                                                                                                                                                                                                                                                                                                                                                                                                                                                                                                                                                                                                                                                                                             |       |     |                                                           |                 |           |           |           |           |           |           |  |
| 48   | Herpes zoster (080020)                           | B022, B023, B027, B028, B029                                                                                                                                                                                                                                                                                                                                                                                                                                                                                                                                                                                                                                                                                                                                                                                                                                                                                                                                                                                                                                                                                                                                                                                                                                                                                                                                                                                                                                                       | 5 542 | 0.5 | 63.3 (38)                                                 | 2.6 (22)        | 0.0 (82)  | 2.8 (97)  | 0.1 (91)  | 0.9 (94)  | 8.0 (70)  | 0.1 (82)  |  |
| 49   | Respiratory failure (040130)                     | J96*                                                                                                                                                                                                                                                                                                                                                                                                                                                                                                                                                                                                                                                                                                                                                                                                                                                                                                                                                                                                                                                                                                                                                                                                                                                                                                                                                                                                                                                                               | 5 501 | 0.5 | 71.4 (20)                                                 | 2.7 (19)        | 9.5 (7)   | 42.3 (22) | 11.3 (13) | 10.9 (69) | 14.0 (44) | 21.8 (14) |  |
| 50   | Upper urinary tract disease (11012x)             | D301, D302, N132, N20*, N281, N288                                                                                                                                                                                                                                                                                                                                                                                                                                                                                                                                                                                                                                                                                                                                                                                                                                                                                                                                                                                                                                                                                                                                                                                                                                                                                                                                                                                                                                                 | 5 291 | 0.5 | 28.8 (75)                                                 | 0.7 (82)        | 0.2 (68)  | 21.8 (48) | 0.9 (71)  | 38.9 (34) | 4.0 (95)  | 0.1 (82)  |  |
| 51   | Interstitial pneumonia (040110)                  | J60, J61, J62*, J63*, J64, J65, J66*, J67*, J68*, J70*, J82, J84*, J990, J991                                                                                                                                                                                                                                                                                                                                                                                                                                                                                                                                                                                                                                                                                                                                                                                                                                                                                                                                                                                                                                                                                                                                                                                                                                                                                                                                                                                                      | 5 266 | 0.5 | 78.8 (10)                                                 | 2.1 (31)        | 1.0 (33)  | 21.2 (49) | 4.6 (28)  | 6.3 (81)  | 21.0 (20) | 25.3 (11) |  |
| 52   | Ischemic enterocolitis (060190)                  | K55*                                                                                                                                                                                                                                                                                                                                                                                                                                                                                                                                                                                                                                                                                                                                                                                                                                                                                                                                                                                                                                                                                                                                                                                                                                                                                                                                                                                                                                                                               | 5 265 | 0.5 | 63.4 (37)                                                 | 1.1 (68)        | 0.6 (45)  | 17.3 (63) | 2.4 (39)  | 11.1 (68) | 10.0 (55) | 4.1 (38)  |  |
| 53   | Malignant tumour of gallbladder (060060)         | C23, C24*                                                                                                                                                                                                                                                                                                                                                                                                                                                                                                                                                                                                                                                                                                                                                                                                                                                                                                                                                                                                                                                                                                                                                                                                                                                                                                                                                                                                                                                                          | 5 159 | 0.4 | 84.1 (7)                                                  | 1.3 (60)        | 0.3 (60)  | 13.1 (74) | 0.8 (73)  | 58.2 (20) | 23.0 (11) | 28.8 (8)  |  |
| 54   | Brain tumour (010010)                            | C700, C709, C71*, C722, C723, C724, C793, D320, D329, D330, D331, D332, D333, D337, D339, D420, D429, D430, D431, D432, D433, D437, D439, G131, G132                                                                                                                                                                                                                                                                                                                                                                                                                                                                                                                                                                                                                                                                                                                                                                                                                                                                                                                                                                                                                                                                                                                                                                                                                                                                                                                               | 4 883 | 0.4 | 47.6 (62)                                                 | 1.7 (44)        | 3.2 (18)  | 28.2 (38) | 4.4 (31)  | 34.2 (40) | 23.0 (11) | 17.1 (19) |  |
| 55   | Spinal stenosis (including spondylosis) (07034x) | G551, G552, G553, G558, G950, G951, G952, G959, M4320, M4321, M4322, M4323, M4324, M4325, M4326, M4327, M4328, M4329, M4700, M4701, M4702, M4703, M4704, M4705, M4706, M4707, M4708, M4709, M4710, M4711, M4712, M4713, M4714, M4715, M4716, M4717, M4718, M4719, M4720, M4721, M4722, M4723, M4724, M4725, M4726, M4727, M4728, M4729, M4780, M4781, M4782, M4783, M4784, M4785, M4786, M4787, M4788, M4789, M4790, M4791, M4792, M4793, M4794, M4795, M4796, M4797, M4798, M4799, M4800, M4801, M4802, M4803, M4804, M4805, M4806, M4807, M4808, M4809, M4810, M4811, M4812, M4813, M4814, M4815, M4816, M4817, M4818, M4819, M4820, M4821, M4822, M4823, M4824, M4825, M4826, M4827, M4828, M4829, M4830, M4831, M4832, M4833, M4834, M4835, M4836, M4837, M4838, M4839, M4840, M4841, M4842, M4843, M4844, M4845, M4846, M4847, M4848, M4849, M4850, M4851, M4852, M4853, M4854, M4855, M4856, M4857, M4858, M4859, M4880, M4881, M4882, M4883, M4884, M4885, M4886, M4887, M4888, M4889, M4890, M4891, M4892, M4893, M4894, M4895, M4896, M4897, M4898, M4899, M4940, M4941, M4942, M4943, M4944, M4945, M4946, M4947, M4948, M4949, M4980, M4981, M4982, M4983, M4984, M4985, M4986, M4987, M4988, M4989, M5300, M5301, M5302, M5303, M5304, M5305, M5306, M5307, M5308, M5309, M5310, M5311, M5312, M5313, M5314, M5315, M5316, M5317, M5318, M5319, M5330, M5331, M5332, M5333, M5334, M5335, M5336, M5337, M5338, M5339, M5380, M5381, M5382, M5383, M5384, M5385, M5386, | 4 807 | 0.4 | 77.3 (12)                                                 | 2.0 (37)        | 0.0 (82)  | 23.6 (45) | 1.0 (68)  | 23.5 (52) | 20.0 (25) | 0.5 (69)  |  |



## Supplemental Table

| Rank | Clinical diagnosis (Disease code)                                                              | ICD-10 codes                                                                                                                                                                                                                                                                                                                                                                                                                                                                                                                                                                                                                                                | N     | %   | Clinical and procedural characteristics, %/median, (rank) |                 |           |           |          |           |           |           |  |
|------|------------------------------------------------------------------------------------------------|-------------------------------------------------------------------------------------------------------------------------------------------------------------------------------------------------------------------------------------------------------------------------------------------------------------------------------------------------------------------------------------------------------------------------------------------------------------------------------------------------------------------------------------------------------------------------------------------------------------------------------------------------------------|-------|-----|-----------------------------------------------------------|-----------------|-----------|-----------|----------|-----------|-----------|-----------|--|
|      |                                                                                                |                                                                                                                                                                                                                                                                                                                                                                                                                                                                                                                                                                                                                                                             |       |     | Age ≥ 65                                                  | Comorbid Mental | Deep Coma | Ambulance | Tertiary | Surgery   | LOS       | Mortality |  |
|      |                                                                                                | M5387, M5388, M5389, M5390, M5391, M5392, M5393, M5394, M5395, M5396, M5397, M5398, M5399, M9950, M9951, M9952, M9953, M9954, M9955, M9956, M9957, M9958, M9959, M9960, M9961, M9962, M9963, M9964, M9965, M9966, M9967, M9968, M9969, M9970, M9971, M9972, M9973, M9974, M9975, M9976, M9977, M9978, M9979                                                                                                                                                                                                                                                                                                                                                 |       |     |                                                           |                 |           |           |          |           |           |           |  |
| 56   | Anaemia (I30090)                                                                               | D500, D501, D508, D509, D510, D511, D512, D513, D518, D519, D520, D521, D528, D529, D530, D531, D532, D538, D539, D550, D551, D552, D559, D560, D561, D562, D563, D564, D569, D570, D571, D572, D573, D580, D581, D582, D588, D589, D590, D591, D592, D593, D594, D595, D596, D599, D62, D640, D641, D642, D643, D644, D648, D649                                                                                                                                                                                                                                                                                                                           | 4 756 | 0.4 | 63.1 (40)                                                 | 2.0 (37)        | 0.6 (45)  | 18.6 (56) | 1.9 (51) | 37.7 (36) | 11.0 (51) | 3.8 (39)  |  |
| 57   | Maternal care related to the fetus and amniotic cavity and possible delivery problems (I20180) | O30*, O31*, O32*, O33*, O34*, O35*, O36*, O40, O41*, O42*, O43*, O44*, O45*, O46*, O48                                                                                                                                                                                                                                                                                                                                                                                                                                                                                                                                                                      | 4 658 | 0.4 | 0.0 (95)                                                  | 0.4 (90)        | 0.0 (82)  | 13.3 (73) | 0.1 (91) | 70.6 (12) | 9.0 (62)  | 0.0 (85)  |  |
| 58   | Malignant tumour of rectum and anus (rectosigmoid colon to anus) (O60040)                      | C19, C20, C21*, D011, D012, D013, D014                                                                                                                                                                                                                                                                                                                                                                                                                                                                                                                                                                                                                      | 4 646 | 0.4 | 63.6 (35)                                                 | 1.9 (40)        | 0.4 (52)  | 14.6 (68) | 1.1 (65) | 49.8 (25) | 23.0 (11) | 21.0 (16) |  |
| 59   | Nontraumatic subdural haemorrhage (O10050)                                                     | I620, I621                                                                                                                                                                                                                                                                                                                                                                                                                                                                                                                                                                                                                                                  | 4 606 | 0.4 | 85.8 (5)                                                  | 2.2 (30)        | 2.7 (20)  | 27.9 (39) | 9.7 (18) | 92.6 (4)  | 10.0 (55) | 1.9 (54)  |  |
| 60   | Acute renal failure (I10290)                                                                   | K767, N17*                                                                                                                                                                                                                                                                                                                                                                                                                                                                                                                                                                                                                                                  | 4 034 | 0.3 | 70.1 (21)                                                 | 3.0 (16)        | 2.7 (20)  | 31.5 (32) | 7.3 (23) | 27.0 (49) | 15.0 (38) | 14.2 (22) |  |
| 61   | Intervertebral disk degeneration, disk herniation (O70350)                                     | M50*, M51*                                                                                                                                                                                                                                                                                                                                                                                                                                                                                                                                                                                                                                                  | 4 004 | 0.3 | 20.2 (84)                                                 | 1.6 (47)        | 0.0 (82)  | 27.4 (40) | 0.2 (89) | 28.8 (47) | 15.0 (38) | 0.0 (85)  |  |
| 62   | Autoimmune disease with systemic organ disease (O70560)                                        | D86*, I00, L88, L92*, L93*, L940, L941, L942, L943, L95*, L982, L983, M0200, M0208, M0209, M0210, M0218, M0219, M0220, M0228, M0229, M0280, M0288, M0289, M0290, M0298, M0299, M0300, M0310, M0320, M0360, M0720, M0740, M0748, M0749, M0750, M0758, M0759, M0760, M0768, M0769, M0830, M0838, M0839, M0840, M0848, M0849, M0880, M0888, M0889, M0890, M0898, M0899, M091*, M092*, M098*, M120*, M121*, M1230, M1238, M1239, M1300, M1302, M1303, M1305, M1310, M1380, M1390, M150, M153, M154, M158, M159, M1900, M300, M301, M302, M308, M31*, M32*, M330, M331, M332, M339, M34*, M350, M351, M352, M353, M354, M355, M356, M357, M358, M359, M36*, M633 | 3 864 | 0.3 | 45.3 (63)                                                 | 3.0 (16)        | 0.5 (50)  | 12.9 (76) | 1.8 (53) | 11.6 (66) | 21.0 (20) | 4.5 (37)  |  |
| 63   | Peritonsillar abscess (O30240)                                                                 | J36                                                                                                                                                                                                                                                                                                                                                                                                                                                                                                                                                                                                                                                         | 3 811 | 0.3 | 10.3 (89)                                                 | 0.3 (93)        | 0.0 (82)  | 2.3 (98)  | 0.2 (89) | 35.0 (39) | 6.0 (82)  | 0.0 (85)  |  |
| 64   | Dystocia with complication of labour or obstetric operation (I20260)                           | O61*, O62*, O63*, O64*, O65*, O66*, O67*, O68*, O69*, O70*, O71*, O720, O721, O722, O73*, O74*, O75*, O81*, O82*, O83*, O84*                                                                                                                                                                                                                                                                                                                                                                                                                                                                                                                                | 3 646 | 0.3 | 0.0 (95)                                                  | 0.4 (90)        | 0.0 (82)  | 13.6 (72) | 0.5 (80) | 84.8 (7)  | 8.0 (70)  | 0.0 (85)  |  |

## Supplemental Table

| Rank | Clinical diagnosis (Disease code)                                                   | ICD-10 codes                                                                                                                                                                                                                                                                                  | N     | %   | Clinical and procedural characteristics, %/median, (rank) |                 |           |           |           |           |           |           |
|------|-------------------------------------------------------------------------------------|-----------------------------------------------------------------------------------------------------------------------------------------------------------------------------------------------------------------------------------------------------------------------------------------------|-------|-----|-----------------------------------------------------------|-----------------|-----------|-----------|-----------|-----------|-----------|-----------|
|      |                                                                                     |                                                                                                                                                                                                                                                                                               |       |     | Age ≥ 65                                                  | Comorbid Mental | Deep Coma | Ambulance | Tertiary  | Surgery   | LOS       | Mortality |
| 65   | Disseminated intravascular coagulation (I30100)                                     | D65, D683, O723                                                                                                                                                                                                                                                                               | 3 631 | 0.3 | 72.0 (18)                                                 | 2.1 (31)        | 8.3 (8)   | 45.5 (18) | 13.9 (11) | 49.6 (26) | 23.0 (11) | 46.0 (1)  |
| 66   | Other humoral/electrolyte/acid–base balance disorders (100393)                      | E870, E871, E872, E873, E874, E875, E877, E878                                                                                                                                                                                                                                                | 3 622 | 0.3 | 61.5 (45)                                                 | 7.0 (4)         | 4.0 (14)  | 32.3 (30) | 8.3 (20)  | 4.6 (86)  | 8.0 (70)  | 2.7 (46)  |
| 67   | Kawasaki disease (1500709)                                                          | M303                                                                                                                                                                                                                                                                                          | 3 576 | 0.3 | 0.0 (95)                                                  | 0.0 (98)        | 0.0 (82)  | 2.1 (99)  | 0.0 (97)  | 0.8 (95)  | 11.0 (51) | 0.0 (85)  |
| 68   | Retinal detachment (020160)                                                         | H330, H332, H333, H334, H335                                                                                                                                                                                                                                                                  | 3 566 | 0.3 | 23.4 (80)                                                 | 0.3 (93)        | 0.0 (82)  | 0.2 (100) | 0.0 (97)  | 99.2 (1)  | 14.0 (44) | 0.0 (85)  |
| 69   | Non–Hodgkin lymphoma (130030)                                                       | C820, C821, C822, C827, C829, C830, C831, C832, C833, C834, C835, C836, C837, C838, C839, C840, C841, C842, C843, C844, C845, C850, C851, C857, C859                                                                                                                                          | 3 492 | 0.3 | 68.0 (24)                                                 | 1.7 (44)        | 0.7 (41)  | 13.9 (70) | 2.0 (48)  | 38.5 (35) | 29.0 (3)  | 24.3 (13) |
| 70   | Sudden idiopathic hearing loss (030428)                                             | H912                                                                                                                                                                                                                                                                                          | 3 489 | 0.3 | 33.9 (71)                                                 | 0.6 (85)        | 0.0 (82)  | 5.3 (94)  | 0.1 (91)  | 2.1 (89)  | 10.0 (55) | 0.0 (85)  |
| 71   | Hypertension or other diseases associated with pregnancy/labour/puerperium (120160) | O10*, O11, O12*, O13, O14*, O15*, O16, O21*, O22*, O23*, O25, O26*                                                                                                                                                                                                                            | 3 480 | 0.3 | 0.1 (93)                                                  | 0.8 (76)        | 0.1 (75)  | 10.7 (84) | 0.3 (87)  | 30.6 (45) | 9.0 (62)  | 0.0 (85)  |
| 72   | Other digestive tract disorders (060570)                                            | K00*, K01*, K02*, K03*, K04*, K05*, K06*, K08*, K09*, K10*, K14*, K319, K590, K591, K592, K594, K598, K599, K629, K66*, K759, K764, K769, K918, K919                                                                                                                                          | 3 420 | 0.3 | 48.2 (58)                                                 | 2.6 (22)        | 0.3 (60)  | 17.7 (61) | 2.2 (43)  | 10.0 (72) | 8.0 (70)  | 2.0 (53)  |
| 73   | Arteriosclerosis obliterans (050170)                                                | I700, I702, I708, I709, I720, I721, I724, I73*, I740, I741, I742, I743, I744, I745, I748, I749                                                                                                                                                                                                | 3 393 | 0.3 | 82.1 (9)                                                  | 1.1 (68)        | 0.6 (45)  | 22.9 (46) | 4.4 (31)  | 60.9 (18) | 18.0 (27) | 9.1 (28)  |
| 74   | Febrile convulsion (150040)                                                         | R560                                                                                                                                                                                                                                                                                          | 3 365 | 0.3 | 0.1 (93)                                                  | 0.0 (98)        | 4.2 (13)  | 55.2 (9)  | 1.0 (68)  | 0.4 (98)  | 4.0 (95)  | 0.0 (85)  |
| 75   | Fracture/dislocation of ankle joint or foot (160850)                                | M8437, S8250, S8260, S8280, S9200, S9210, S9220, S9230, S9240, S9250, S9270, S9290, S930, S931, S932, S933                                                                                                                                                                                    | 3 345 | 0.3 | 36.3 (69)                                                 | 2.1 (31)        | 0.0 (82)  | 28.8 (36) | 1.8 (53)  | 83.5 (8)  | 27.0 (5)  | 0.0 (85)  |
| 76   | Periarticular fracture/dislocation of knee (160820)                                 | S7240, S8200, S8210, S8270                                                                                                                                                                                                                                                                    | 3 343 | 0.3 | 66.3 (29)                                                 | 2.4 (27)        | 0.2 (68)  | 38.6 (24) | 1.4 (60)  | 69.1 (13) | 35.0 (1)  | 0.4 (73)  |
| 77   | Influenza, viral pneumonia (040070)                                                 | J10*, J11*, J12*                                                                                                                                                                                                                                                                              | 3 309 | 0.3 | 4.4 (92)                                                  | 0.3 (93)        | 0.3 (60)  | 6.8 (92)  | 0.1 (91)  | 1.2 (93)  | 6.0 (82)  | 0.2 (79)  |
| 78   | Multiple injuries (160990)                                                          | S434, S435, S436, S437, S49*, S59*, S69*, S79*, S89*, S99*, T00*, T01*, T02*, T03*, T04*, T06*, T07                                                                                                                                                                                           | 3 254 | 0.3 | 57.3 (50)                                                 | 3.6 (10)        | 1.6 (26)  | 65.2 (5)  | 15.9 (10) | 40.5 (32) | 19.0 (26) | 0.8 (64)  |
| 79   | Fulminant hepatitis, acute liver failure, acute hepatitis (060270)                  | B150, B159, B160, B161, B162, B169, B170, B171, B172, B178, B19*, B251, K710, K711, K712, K719, K720, K762, K763                                                                                                                                                                              | 3 212 | 0.3 | 28.8 (75)                                                 | 2.1 (31)        | 1.2 (31)  | 10.8 (83) | 2.8 (38)  | 6.8 (79)  | 14.0 (44) | 7.8 (31)  |
| 80   | Chronic obstructive lung disease (040120)                                           | J43*, J44*                                                                                                                                                                                                                                                                                    | 3 165 | 0.3 | 87.7 (3)                                                  | 2.1 (31)        | 1.5 (29)  | 31.4 (33) | 3.8 (34)  | 4.7 (85)  | 15.0 (38) | 10.7 (25) |
| 81   | Unspecified injury (161060)                                                         | T090, T091, T092, T093, T094, T095, T098, T099, T10*, T110, T119, T12*, T130, T131, T132, T133, T134, T135, T138, T139, T140, T141, T142*, T143, T144, T145, T146, T148, T149, T189, T288, T289, T66, T71, T73*, T751, T753, T758, T782, T783, T784, T788, T789, T794, T795, T797, T798, T799 | 3 127 | 0.3 | 32.7 (73)                                                 | 2.9 (18)        | 5.5 (12)  | 54.2 (10) | 20.1 (7)  | 25.7 (50) | 3.0 (98)  | 3.8 (39)  |
| 82   | Haemorrhage in early                                                                | O20*                                                                                                                                                                                                                                                                                          | 3 108 | 0.3 | 0.0 (95)                                                  | 0.4 (90)        | 0.0 (82)  | 5.2 (95)  | 0.1 (91)  | 8.3 (75)  | 9.0 (62)  | 0.0 (85)  |



Supplemental Table

| Rank | Clinical diagnosis (Disease code)                                                  | ICD-10 codes                                                                                                                                                                                                      | N     | %   | Clinical and procedural characteristics, %/median, (rank) |                 |           |           |           |           |           |           |  |
|------|------------------------------------------------------------------------------------|-------------------------------------------------------------------------------------------------------------------------------------------------------------------------------------------------------------------|-------|-----|-----------------------------------------------------------|-----------------|-----------|-----------|-----------|-----------|-----------|-----------|--|
|      |                                                                                    |                                                                                                                                                                                                                   |       |     | Age ≥ 65                                                  | Comorbid Mental | Deep Coma | Ambulance | Tertiary  | Surgery   | LOS       | Mortality |  |
|      | pregnancy (120150)                                                                 |                                                                                                                                                                                                                   |       |     |                                                           |                 |           |           |           |           |           |           |  |
| 83   | Leucocytic disease (130070)                                                        | D70, D720, D721, D728, D729                                                                                                                                                                                       | 3 049 | 0.3 | 48.9 (56)                                                 | 1.2 (66)        | 0.1 (75)  | 4.8 (96)  | 0.5 (80)  | 17.7 (60) | 7.0 (78)  | 2.9 (43)  |  |
| 84   | Dissecting aneurysm (050161)                                                       | I710                                                                                                                                                                                                              | 2 974 | 0.3 | 64.4 (32)                                                 | 1.6 (47)        | 2.2 (23)  | 58.8 (7)  | 21.5 (4)  | 33.7 (41) | 23.0 (11) | 10.2 (26) |  |
| 85   | Alcoholic liver disease (060280)                                                   | K70*                                                                                                                                                                                                              | 2 964 | 0.3 | 30.7 (74)                                                 | 14.7 (2)        | 1.6 (26)  | 25.2 (43) | 2.4 (39)  | 12.7 (64) | 14.0 (44) | 9.4 (27)  |  |
| 86   | Male genital diseases (11022x)                                                     | D294, I861, N41*, N43*, N44, N45*, N46, N47, N48*, N508                                                                                                                                                           | 2 841 | 0.2 | 53.3 (53)                                                 | 0.9 (73)        | 0.0 (82)  | 8.9 (89)  | 0.7 (75)  | 15.3 (62) | 8.0 (70)  | 0.3 (74)  |  |
| 87   | Pulmonary/mediastinal infection and abscess (040150)                               | A065, B440, B441, B45*, B659, B664, E321, E328, J850, J851, J852, J853, J86*, J985                                                                                                                                | 2 834 | 0.2 | 62.2 (42)                                                 | 2.6 (22)        | 0.7 (41)  | 20.4 (51) | 3.8 (34)  | 18.9 (58) | 24.0 (9)  | 11.4 (23) |  |
| 88   | Malignant tumour of oesophagus (including cervical region) (060010)                | C150, C151, C152, C153, C154, C155, C158, C159, D001                                                                                                                                                              | 2 805 | 0.2 | 66.6 (28)                                                 | 2.0 (37)        | 0.4 (52)  | 12.7 (77) | 0.7 (75)  | 36.5 (38) | 22.0 (18) | 30.9 (6)  |  |
| 89   | Pelvic injury (160980)                                                             | S321*, S322*, S323*, S324*, S325*, S327*, S328*, S332, S333, S334, S335, S336, S337, S348, S377*, S378*, S379*, S383, S39*                                                                                        | 2 783 | 0.2 | 67.7 (25)                                                 | 3.2 (13)        | 0.7 (41)  | 53.3 (12) | 10.2 (17) | 22.6 (54) | 25.0 (7)  | 1.0 (60)  |  |
| 90   | Muscle and tendon injury of the extremities (160610)                               | M620*, M621*, M623*, M626*, M628*, M629*, M660*, M661*, M662*, M663*, M664*, M665*, S46*, S534, S56*, S633, S634, S635, S636, S637, S66*, S731, S76*, S86*, S934, S935, S936, S96*, T112, T115                    | 2 700 | 0.2 | 33.3 (72)                                                 | 4.5 (5)         | 0.8 (38)  | 30.8 (34) | 3.6 (36)  | 55.5 (22) | 10.0 (55) | 0.6 (66)  |  |
| 91   | Retroperitoneal disease (110050)                                                   | C786, D200, D483                                                                                                                                                                                                  | 2 695 | 0.2 | 65.1 (31)                                                 | 1.6 (47)        | 0.4 (52)  | 12.7 (77) | 0.9 (71)  | 28.4 (48) | 21.0 (20) | 45.7 (2)  |  |
| 92   | Chemical poisoning (161070b)                                                       | T46*, T47*, T48*, T49*, T50*, T51*, T52*, T53*, T54*, T55, T56*, T57*, T58, T59*, T60*, T61*, T62*, T63*, T64, T65*, T887                                                                                         | 2 694 | 0.2 | 40.5 (68)                                                 | 9.0 (3)         | 7.9 (10)  | 52.6 (13) | 21.3 (6)  | 12.7 (64) | 3.0 (98)  | 3.8 (39)  |  |
| 93   | Facial injury (including oral/pharyngeal injury) (160200)                          | S003, S004, S005, S012, S013, S014, S015, S022*, S023*, S024*, S025*, S026*, S027*, S028*, S029*, S041, S042, S043, S044, S045, S046, S047, S048, S049, S070, S078, S081, S088, S099, S100, S101, T180            | 2 576 | 0.2 | 24.3 (79)                                                 | 2.6 (22)        | 1.9 (25)  | 53.4 (11) | 11.3 (13) | 55.0 (24) | 5.0 (89)  | 0.6 (66)  |  |
| 94   | Malignant tumour of bone or soft tissue (excluding spine and spinal cord) (070040) | C400, C401, C402, C403, C408, C409, C413, C418, C419, C471, C472, C473, C474, C475, C476, C478, C479, C491, C492, C493, C494, C495, C496, C498, C499, C764, C765, C773, C774, C795, C96*, D092, D097              | 2 550 | 0.2 | 63.1 (40)                                                 | 3.5 (11)        | 0.2 (68)  | 17.5 (62) | 0.5 (80)  | 24.1 (51) | 25.0 (7)  | 24.4 (12) |  |
| 95   | Malignant prostatic tumour (110080)                                                | C61, C637, D075                                                                                                                                                                                                   | 2 549 | 0.2 | 90.3 (2)                                                  | 1.3 (60)        | 0.7 (41)  | 15.6 (65) | 0.5 (80)  | 23.1 (53) | 16.0 (34) | 21.8 (14) |  |
| 96   | Periarticular fracture/dislocation of elbow (160740)                               | S4240, S5200, S5210, S530, S531                                                                                                                                                                                   | 2 494 | 0.2 | 20.3 (83)                                                 | 0.7 (82)        | 0.0 (82)  | 18.8 (54) | 0.8 (73)  | 95.8 (2)  | 4.0 (95)  | 0.2 (79)  |  |
| 97   | Fracture of forearm (160760)                                                       | S5220, S5230, S5240, S5250, S5270, S5280, S5290                                                                                                                                                                   | 2 463 | 0.2 | 41.0 (67)                                                 | 0.5 (87)        | 0.1 (75)  | 27.1 (41) | 1.6 (55)  | 95.4 (3)  | 7.0 (78)  | 0.0 (85)  |  |
| 98   | Diabetic ketoacidosis, nonketotic coma (100040)                                    | E100, E101, E110, E111, E130, E131, E140, E141                                                                                                                                                                    | 2 444 | 0.2 | 41.7 (66)                                                 | 4.0 (6)         | 9.8 (6)   | 44.7 (20) | 10.4 (15) | 4.9 (84)  | 15.0 (38) | 3.4 (42)  |  |
| 99   | Other musculoskeletal/connective tissue diseases (071030)                          | M!!!!, M0000, M0008, M0009, M0010, M0018, M0019, M0020, M0028, M0029, M0080, M0088, M0089, M0090, M0098, M0099, M0100, M0108, M0109, M0110, M0118, M0119, M0120, M0128, M0129, M0130, M0138, M0139, M0140, M0148, | 2 389 | 0.2 | 47.7 (61)                                                 | 1.3 (60)        | 0.0 (82)  | 47.1 (16) | 0.5 (80)  | 5.5 (83)  | 8.0 (70)  | 0.5 (69)  |  |

## Supplemental Table

| Rank | Clinical diagnosis (Disease code)                    | ICD-10 codes                                                                                                                                                                                                                                                                                                                                                                                                                                                                                                                                                                                                                                                                                                                                                                                                                                                                                                                                                                                                                                                                                                                                                                                                                                                                                                                                                                                                                                                                                                                                                                                                                                | N     | %   | Clinical and procedural characteristics, %/median, (rank) |                 |           |           |          |          |           |           |  |
|------|------------------------------------------------------|---------------------------------------------------------------------------------------------------------------------------------------------------------------------------------------------------------------------------------------------------------------------------------------------------------------------------------------------------------------------------------------------------------------------------------------------------------------------------------------------------------------------------------------------------------------------------------------------------------------------------------------------------------------------------------------------------------------------------------------------------------------------------------------------------------------------------------------------------------------------------------------------------------------------------------------------------------------------------------------------------------------------------------------------------------------------------------------------------------------------------------------------------------------------------------------------------------------------------------------------------------------------------------------------------------------------------------------------------------------------------------------------------------------------------------------------------------------------------------------------------------------------------------------------------------------------------------------------------------------------------------------------|-------|-----|-----------------------------------------------------------|-----------------|-----------|-----------|----------|----------|-----------|-----------|--|
|      |                                                      |                                                                                                                                                                                                                                                                                                                                                                                                                                                                                                                                                                                                                                                                                                                                                                                                                                                                                                                                                                                                                                                                                                                                                                                                                                                                                                                                                                                                                                                                                                                                                                                                                                             |       |     | Age ≥ 65                                                  | Comorbid Mental | Deep Coma | Ambulance | Tertiary | Surgery  | LOS       | Mortality |  |
|      |                                                      | M0149, M0150, M0158, M0159, M0160, M0168, M0169, M0180, M0188, M0189, M0308, M0309, M0312, M0318, M0319, M0328, M0329, M0368, M0369, M1240, M1248, M1249, M1250, M1258, M1259, M1280, M1288, M1289, M1309, M1319, M1389, M1399, M1908, M1909, M1910, M1918, M1919, M1920, M1928, M1929, M1980, M1988, M1989, M1990, M1998, M1999, M2100, M2108, M2109, M2110, M2118, M2119, M2120, M2128, M2129, M2170, M2178, M2179, M2180, M2188, M2189, M2190, M2198, M2199, M2450, M2458, M2459, M2460, M2468, M2469, M2480, M2488, M2489, M2500, M2508, M2509, M2510, M2518, M2519, M2540, M2548, M2549, M2550, M2551, M2552, M2554, M2555, M2556, M2557, M2558, M2559, M2560, M2568, M2569, M2570, M2578, M2579, M2580, M2588, M2589, M2590, M2598, M2599, M540*, M541*, M542*, M543*, M544*, M545*, M546*, M548*, M549*, M671, M678, M679, M798*, M799*, M8300, M8301, M8302, M8303, M8304, M8305, M8307, M8308, M8309, M8310, M8311, M8312, M8313, M8314, M8315, M8317, M8318, M8319, M8320, M8321, M8322, M8323, M8324, M8325, M8327, M8328, M8329, M8330, M8331, M8332, M8333, M8334, M8335, M8337, M8338, M8339, M8340, M8341, M8342, M8343, M8344, M8345, M8347, M8348, M8349, M8350, M8351, M8352, M8353, M8354, M8355, M8357, M8358, M8359, M8380, M8381, M8382, M8383, M8384, M8385, M8387, M8388, M8389, M8390, M8391, M8392, M8393, M8394, M8395, M8397, M8398, M8399, M852*, M858*, M859*, M8600, M8800, M8801, M8802, M8803, M8804, M8805, M8806, M8807, M8809, M889*, M900*, M901*, M902*, M906*, M907*, M913*, M938, M951, M952, M953, M954, M955, M958, M959, M961, M966, M968, M969, M990*, M991*, M992*, M993*, M994*, M998*, M999* |       |     |                                                           |                 |           |           |          |          |           |           |  |
| 100  | Fracture or dislocation around the shoulder (160720) | M2431, M2441, S4220, S4230, S4270, S4280, S4290, S430, S431, S432, S433                                                                                                                                                                                                                                                                                                                                                                                                                                                                                                                                                                                                                                                                                                                                                                                                                                                                                                                                                                                                                                                                                                                                                                                                                                                                                                                                                                                                                                                                                                                                                                     | 2 370 | 0.2 | 68.9 (22)                                                 | 3.1 (15)        | 0.0 (82)  | 35.6 (26) | 2.2 (43) | 76.8 (9) | 21.0 (20) | 0.6 (66)  |  |

Rankings were based on data from the top 100 causes of admissions. Comorbidity of mental illness was defined as the following ICD-10 codes as comorbidities: unipolar depressive disorders (F32–F33), bipolar affective disorder (F30–F31), schizophrenia (F20–F29), alcohol use disorders (F10), drug use disorders (F11–F16 and F18–F19), post-traumatic stress disorder (F431), obsessive-compulsive disorder (F42), panic disorder (F40 and F410), or insomnia (F51). Deep coma was defined as a score on the Japan Soma Scale of 100 or more.

Ambulance, ambulance services; LOS, median length of stay; Mortality, in-hospital mortality; Surgery, surgical procedures; Tertiary, tertiary emergency medical services; \*, wild card; M!!!!, ICD-10 code numbers starting with ‘M’ not elsewhere classified.
